# Supplementary material for: Identification of lncRNA biomarkers for lung cancer through integrative cross-platform data analyses
Source: Aging (Albany NY). 2020 Jul 16;12(14):14506–27. doi: 10.18632/aging.103496 (PMC7425463; doi:10.18632/aging.103496)
Supplement: Supplementary Table 1 [file aging-12-103496-s001..xlsx]

## Sheet: Affymetrix Dataset T-Test
Affymetrix Dataset Two Sample T-Test Results
variable	Normal	Tumor	tissue type => Tumor vs Normal.Estimate	tissue type => Tumor vs Normal.FoldChange	tissue type => Tumor vs Normal.RawPValue	tissue type => Tumor vs Normal.FDR_BH
TTTY1-201	-0.01	0.0033	0.0133	1.0093	0.5347	0.5987
TTTY11-201	-0.0469	0.0394	0.0863	1.0617	0.0063	0.0134
D21S2088E-201	-0.0005	-0.001	-0.0005	-1.0004	0.9821	0.9851
LINC01931-201	-0.0219	0.0165	0.0384	1.027	0.0318	0.0545
LINC00208-201	-0.005	0.003	0.0079	1.0055	0.7522	0.7934
MIR31HG-201	-0.2481	0.2013	0.4494	1.3655	3.6407e-09	3.5775e-08
CSPG4P2Y-201	-0.0182	0.0107	0.0289	1.0202	0.2681	0.341
LINC00471-201	-0.0322	0.0285	0.0607	1.043	0.0001	0.0005
FO393415.1-201	0.2914	-0.23	-0.5214	-1.4353	1.3398e-19	4.1619e-18
C9orf106-201	-0.031	0.028	0.0589	1.0417	0.0216	0.0386
LINC02363-201	-0.0382	0.0289	0.0672	1.0477	0.0063	0.0133
AL049647.1-201	-0.05	0.0349	0.0849	1.0606	0.0081	0.0167
AL161668.1-201	-0.0126	0.0097	0.0222	1.0155	0.2195	0.2856
LINC01658-201	-0.0667	0.049	0.1158	1.0835	2.9428e-05	0.0001
LINC00304-201	0.0148	-0.014	-0.0288	-1.0202	0.3704	0.442
HECW1-IT1-201	-0.0153	0.0142	0.0295	1.0207	0.0392	0.0649
LINC00305-201	-0.0222	0.0167	0.0389	1.0273	0.0081	0.0167
TTTY14-201	0.379	-0.3055	-0.6845	-1.6071	1.0992e-15	2.4616e-14
LINC00314-201	-0.0252	0.019	0.0442	1.0311	0.0011	0.003
LINC00334-201	-0.0216	0.0177	0.0393	1.0276	0.0096	0.019
TTTY13-201	-0.0696	0.0561	0.1257	1.091	7.7505e-07	4.9758e-06
LINC01116-202	-0.6153	0.4931	1.1084	2.1561	1.1642e-14	2.1559e-13
GATA3-AS1-201	-0.0291	0.0244	0.0536	1.0378	0.0029	0.0068
NBPF5P-201	-0.0407	0.0362	0.0769	1.0547	0.0004	0.0011
AL162431.2-201	-0.1978	0.16	0.3578	1.2815	7.9666e-11	1.0229e-09
C20orf204-201	-0.1692	0.138	0.3071	1.2373	8.3939e-08	6.4666e-07
AFDN-DT-201	0.0194	-0.0104	-0.0298	-1.0209	0.5611	0.6245
AC004893.2-201	-0.021	0.0189	0.0399	1.0281	0.1037	0.1516
CROCCP2-201	-0.0209	0.0151	0.036	1.0253	0.3387	0.4119
AC015969.1-201	-0.0127	0.0106	0.0234	1.0163	0.1212	0.1721
AC105053.1-201	0.0329	-0.026	-0.0589	-1.0417	9.7316e-05	0.0004
LINC00311-201	-0.0127	0.0065	0.0193	1.0134	0.3192	0.3931
AL645568.1-201	-0.0029	0.0047	0.0076	1.0053	0.8445	0.8717
SPATA42-201	0.0045	-0.0032	-0.0077	-1.0054	0.6489	0.7021
LINC00619-201	0.0354	-0.0265	-0.0619	-1.0438	0.0016	0.0041
LINC01854-201	-0.0782	0.0621	0.1404	1.1022	1.9554e-07	1.4265e-06
MAMDC2-AS1-201	-0.0105	0.0064	0.0169	1.0118	0.3737	0.4438
AL391987.4-201	0.0587	-0.0415	-0.1002	-1.072	0.4236	0.4907
AC007389.1-202	-0.015	0.0131	0.0281	1.0197	0.18	0.2434
FAM239A-201	-0.2044	0.1689	0.3733	1.2953	1.104e-13	1.8985e-12
FAM99A-201	-0.0467	0.0404	0.0871	1.0623	0.0017	0.0044
C1RL-AS1-201	-0.0469	0.0353	0.0822	1.0586	0.0123	0.0236
WT1-AS-201	-0.0286	0.0225	0.0511	1.0361	0.0938	0.1398
LINC02026-201	-0.0409	0.0307	0.0715	1.0508	0.0002	0.0006
TTTY5-201	-0.0258	0.0183	0.0441	1.031	0.1076	0.1551
LINC01139-201	-0.1784	0.1435	0.322	1.25	2.5278e-06	1.4236e-05
MIR4435-2HG-203	-0.3044	0.2509	0.5554	1.4695	3.5683e-08	2.937e-07
AL031587.1-201	-0.0755	0.0599	0.1353	1.0983	0.0002	0.0006
TTLL11-IT1-201	-0.0417	0.0335	0.0752	1.0535	0.0008	0.0024
AL121899.1-202	0.0263	-0.0224	-0.0486	-1.0343	0.3478	0.4202
HSPC324-201	0.5704	-0.4572	-1.0275	-2.0386	1.1535e-44	2.2216e-42
IL10RB-AS1-201	0.1553	-0.1408	-0.2961	-1.2278	8.121e-07	5.1792e-06
LINC00354-201	-0.0145	0.0129	0.0274	1.0191	0.159	0.2172
LINC00092-201	0.0318	-0.0241	-0.0559	-1.0395	0.0393	0.0649
AC235097.1-201	0.0041	-0.0066	-0.0107	-1.0075	0.5495	0.6139
AL122058.1-201	-0.0504	0.0408	0.0913	1.0653	5.4946e-07	3.6242e-06
AL136531.1-201	0.0152	-0.0106	-0.0258	-1.018	0.3668	0.4399
LINC00606-201	-0.0173	0.0118	0.0292	1.0204	0.0944	0.1405
LINC01734-201	-0.0082	0.0055	0.0136	1.0095	0.4355	0.5029
LINC01191-201	-0.0488	0.0379	0.0867	1.062	2.2231e-06	1.2743e-05
LINC00427-201	-0.0204	0.0188	0.0392	1.0275	0.0575	0.0906
LINC00525-201	-0.1446	0.1211	0.2657	1.2023	4.5014e-09	4.3786e-08
LINC01312-201	0.0952	-0.0776	-0.1728	-1.1272	1.0258e-13	1.7961e-12
CCDC148-AS1-201	-0.0313	0.0234	0.0547	1.0386	0.0007	0.0019
LINC00894-201	0.2262	-0.1766	-0.4028	-1.322	7.5766e-13	1.1961e-11
AL139039.3-201	-0.0383	0.0275	0.0658	1.0467	0.0076	0.016
AC104823.1-201	-0.0731	0.0601	0.1332	1.0967	0.0406	0.0663
LINC01720-201	-0.0172	0.0135	0.0307	1.0215	0.0595	0.0931
AC000099.1-202	-0.0122	0.007	0.0192	1.0134	0.298	0.3732
AL031666.1-201	0.0238	-0.022	-0.0457	-1.0322	0.1031	0.1511
AC131097.3-201	-0.0335	0.0247	0.0582	1.0412	0.0025	0.0062
LINC00421-201	-0.0469	0.0347	0.0816	1.0582	0.0082	0.0168
HCP5-201	0.0856	-0.0634	-0.149	-1.1088	0.2287	0.2968
AC002480.4-201	-0.0317	0.0255	0.0572	1.0405	0.0474	0.0763
LINC00887-202	-0.0226	0.0174	0.04	1.0281	0.0231	0.0409
LINC00437-201	0.0034	-0.0016	-0.005	-1.0035	0.699	0.748
LINC00330-201	-0.0515	0.0437	0.0952	1.0682	0.0003	0.001
LINC01704-201	-0.0093	0.0072	0.0165	1.0115	0.5041	0.5684
EGOT-201	-0.0666	0.0487	0.1153	1.0832	0.001	0.0026
TPTEP1-203	0.011	-0.0023	-0.0133	-1.0092	0.7846	0.8195
VPS13A-AS1-201	-0.0915	0.0707	0.1623	1.1191	1.5481e-06	9.3764e-06
LINC01128-201	-0.003	3.5766e-05	0.003	1.0021	0.8811	0.9031
PIK3CD-AS2-201	-0.0627	0.051	0.1137	1.082	2.1947e-08	1.8539e-07
AC007349.3-201	-0.0087	0.0073	0.016	1.0111	0.2938	0.3689
ELFN1-AS1-201	-0.0854	0.0643	0.1498	1.1094	8.6372e-05	0.0003
LINC01614-201	-1.1714	0.9257	2.0971	4.2786	1.0365e-34	9.9818e-33
AC108058.1-202	-0.0304	0.0266	0.057	1.0403	0.0283	0.0493
KIAA1614-AS1-201	-0.134	0.1053	0.2393	1.1804	1.8951e-10	2.2255e-09
LINC01656-201	-0.0932	0.0718	0.165	1.1212	1.1872e-09	1.2293e-08
AP006285.2-201	-0.0568	0.0446	0.1015	1.0729	8.9503e-05	0.0003
AL139352.1-201	-0.0194	0.0164	0.0358	1.0251	0.1514	0.2092
AC092155.1-202	-0.0178	0.016	0.0338	1.0237	0.0283	0.0493
LINC01689-201	-0.0194	0.0157	0.035	1.0246	0.0406	0.0663
LINC00630-201	-0.0068	0.0045	0.0113	1.0079	0.4534	0.521
ZNF503-AS1-201	0.0879	-0.0726	-0.1605	-1.1177	0.0039	0.0088
AL691426.1-201	-0.0117	0.0092	0.0208	1.0146	0.3156	0.3897
DAB1-AS1-201	-0.0337	0.0244	0.0581	1.0411	0.0019	0.0048
CLDN10-AS1-201	-0.0224	0.0146	0.037	1.026	0.2112	0.2767
MIATNB-201	-0.0516	0.0513	0.1029	1.074	0.0206	0.0372
LINP1-201	-0.2376	0.1888	0.4264	1.3439	6.3728e-13	1.0228e-11
AC092535.1-201	-0.0234	0.0196	0.043	1.0303	0.0091	0.0183
AC011752.1-203	-0.0258	0.0214	0.0471	1.0332	0.0184	0.0337
CHL1-AS1-201	-0.02	0.0168	0.0368	1.0258	0.0344	0.0579
LINC01756-201	-0.0491	0.0393	0.0884	1.0632	0.0002	0.0006
LINC02579-201	-0.0627	0.0485	0.1113	1.0802	0.0001	0.0004
AL645608.1-202	-0.0529	0.0386	0.0916	1.0655	0.0077	0.016
AL160408.1-201	-0.009	0.0066	0.0156	1.0109	0.5	0.5658
LINC01424-201	-0.0467	0.039	0.0856	1.0611	0.0002	0.0006
LINC00705-201	-0.0704	0.0564	0.1268	1.0919	3.4556e-05	0.0002
AC080129.2-201	-0.0158	0.0149	0.0306	1.0215	0.12	0.1709
AL391704.2-201	-0.0268	0.0214	0.0482	1.034	0.0141	0.0267
AL391832.2-201	-0.0433	0.0354	0.0787	1.0561	0.0003	0.001
LINC01219-201	-0.1262	0.1043	0.2305	1.1732	0.0323	0.0551
PACRG-AS2-201	-0.0427	0.0348	0.0775	1.0552	7.7105e-06	4.0575e-05
AL450469.1-201	-0.0174	0.0125	0.0299	1.0209	0.1878	0.2519
AC093690.1-201	-0.047	0.0387	0.0857	1.0612	1.8437e-05	8.8773e-05
AC106869.1-203	-0.0372	0.0272	0.0644	1.0457	0.001	0.0027
LINC00317-201	-0.0617	0.0508	0.1126	1.0811	1.5472e-06	9.3764e-06
LINC02097-201	-0.0185	0.0128	0.0313	1.022	0.1366	0.1907
LINC00410-201	-0.0548	0.0415	0.0963	1.069	5.4866e-05	0.0002
FLJ37035-201	-0.0841	0.069	0.1531	1.112	2.2219e-05	0.0001
LINC00308-201	0.0207	-0.0182	-0.0389	-1.0273	0.1025	0.1505
LINC01788-201	-0.0208	0.0165	0.0372	1.0262	0.0382	0.0636
AC019117.2-201	0.0268	-0.019	-0.0457	-1.0322	0.4164	0.4843
LINC01687-202	-0.0241	0.0202	0.0443	1.0312	0.0336	0.0569
LINC01494-201	-0.0363	0.0292	0.0654	1.0464	0.0053	0.0116
LINC01527-201	-0.0104	0.0129	0.0233	1.0162	0.167	0.2272
AL445430.1-201	0.0115	-0.0112	-0.0228	-1.0159	0.1537	0.2117
AL109924.2-201	-0.0284	0.0234	0.0518	1.0365	0.0266	0.0469
AL162391.1-201	-0.0166	0.012	0.0287	1.0201	0.1217	0.1726
AP002884.3-203	-0.1257	0.1047	0.2305	1.1732	0.0028	0.0067
TP73-AS1-202	0.0379	-0.0324	-0.0703	-1.0499	0.0097	0.0193
AL021937.1-201	-0.0907	0.0749	0.1656	1.1216	5.5157e-09	5.259e-08
AP001605.1-201	-0.0147	0.0117	0.0264	1.0185	0.0537	0.0854
SH3BP5-AS1-202	0.2935	-0.2406	-0.5342	-1.4481	6.6715e-22	2.471e-20
AL360093.1-201	-0.0332	0.0282	0.0613	1.0434	0.001	0.0027
AC092809.4-201	-0.0291	0.023	0.0521	1.0368	0.0899	0.1345
AL139125.1-201	-0.0817	0.0662	0.1479	1.108	1.1366e-06	7.0614e-06
NUTM2A-AS1-205	0.1246	-0.0991	-0.2236	-1.1677	0.0004	0.0012
LINC00574-201	-0.0329	0.0238	0.0567	1.0401	0.0437	0.0706
AC104653.1-201	-0.0536	0.0461	0.0996	1.0715	0.0055	0.012
AC007389.3-201	-0.15	0.1135	0.2635	1.2004	1.6746e-11	2.2398e-10
AC074035.1-201	0.0024	-0.0011	-0.0035	-1.0024	0.8339	0.8616
ENTPD3-AS1-201	0.0391	-0.0298	-0.0689	-1.0489	8.9935e-05	0.0003
LINC01305-201	-0.1582	0.1298	0.2879	1.2209	7.1214e-07	4.6026e-06
MRGPRG-AS1-201	-0.0416	0.0336	0.0752	1.0535	0.0153	0.0288
LINC01426-202	-0.0395	0.031	0.0705	1.0501	0.0001	0.0005
AC004947.1-201	0.1044	-0.0814	-0.1858	-1.1375	3.0123e-05	0.0001
AP000289.1-201	-0.0487	0.0369	0.0856	1.0612	5.5643e-05	0.0002
AL357055.3-201	-0.0089	0.008	0.0168	1.0117	0.2809	0.355
NEXN-AS1-201	0.0259	-0.0212	-0.0471	-1.0332	0.0012	0.0031
LINC00271-201	0.0844	-0.0701	-0.1544	-1.113	8.5889e-10	8.9904e-09
SOX1-OT-201	-0.0216	0.0178	0.0394	1.0277	0.307	0.3819
BSN-AS2-201	-0.0316	0.0256	0.0572	1.0405	0.0099	0.0196
LINC00174-204	-0.0224	0.0235	0.0459	1.0323	0.2178	0.2838
AC007557.4-201	-0.0356	0.028	0.0636	1.045	0.0048	0.0107
LINC01936-201	0.7976	-0.645	-1.4426	-2.7182	1.6173e-45	3.8937e-43
AL023755.1-203	-0.0231	0.0189	0.042	1.0296	0.0643	0.1005
AC010145.1-201	-0.0388	0.0307	0.0696	1.0494	0.011	0.0214
AC005064.1-201	-0.1579	0.1314	0.2894	1.2221	2.2554e-05	0.0001
AL391095.1-201	-0.0487	0.0376	0.0862	1.0616	0.0011	0.0029
LINC01074-201	-0.0302	0.0248	0.055	1.0389	0.0013	0.0033
AC016747.1-203	-0.1301	0.101	0.2311	1.1737	0.0219	0.039
LINC00857-201	-0.1443	0.1161	0.2604	1.1978	3.9165e-08	3.1962e-07
MAP3K20-AS1-203	-0.0271	0.022	0.0491	1.0346	0.0248	0.0438
AC004906.1-201	-0.0653	0.0488	0.1141	1.0823	2.0297e-07	1.4696e-06
LINC00284-201	0.0442	-0.0367	-0.0809	-1.0577	0.0002	0.0006
AL162425.1-201	-0.04	0.0321	0.0721	1.0512	0.0003	0.0009
AL355674.1-201	-0.0122	0.0087	0.0209	1.0146	0.154	0.2117
AC062015.1-201	-0.0204	0.018	0.0384	1.027	0.0759	0.1163
AC156455.1-203	-0.0231	0.0213	0.0445	1.0313	0.504	0.5684
AL139246.3-201	-0.0148	0.0069	0.0217	1.0152	0.5616	0.6245
AL603840.1-203	-0.0105	0.0085	0.019	1.0132	0.3356	0.4098
SLIT1-AS1-201	-0.0472	0.0337	0.0809	1.0577	0.0019	0.0046
IL6R-AS1-201	0.0226	-0.0192	-0.0419	-1.0294	0.0411	0.0668
AC007128.1-201	-0.144	0.1208	0.2649	1.2015	0.001	0.0026
AC024560.1-201	-0.1317	0.1057	0.2374	1.1788	0.0004	0.0012
AC016909.2-201	-0.0394	0.0348	0.0742	1.0527	0.001	0.0026
AL353148.1-202	-0.0116	0.0072	0.0188	1.0131	0.3466	0.4193
LINC01315-202	0.0313	-0.0222	-0.0535	-1.0378	0.3717	0.4425
AP001626.1-201	-0.0508	0.0439	0.0947	1.0678	6.6287e-05	0.0003
LINC01137-201	-0.0038	-0.0021	0.0017	1.0012	0.977	0.9821
PITPNA-AS1-201	-0.3863	0.3167	0.703	1.6279	1.9284e-21	6.6322e-20
AL445433.2-201	0.0089	-0.006	-0.015	-1.0104	0.1828	0.2466
AC099684.1-202	-0.0295	0.0236	0.0531	1.0375	0.0155	0.0291
LINC00462-201	-0.0957	0.0775	0.1732	1.1275	1.9096e-05	9.1491e-05
LINC01523-201	-0.0387	0.0314	0.0701	1.0498	0.0031	0.0074
AL360295.1-201	-0.0392	0.032	0.0712	1.0506	0.0004	0.0012
LINC00454-201	-0.0417	0.0371	0.0788	1.0562	0.0018	0.0045
BX088651.2-201	0.0011	-0.0019	-0.0031	-1.0021	0.8854	0.9042
AC103702.2-203	-0.1224	0.0984	0.2209	1.1654	4.9159e-10	5.26e-09
AL450384.2-201	0.1275	-0.0959	-0.2234	-1.1675	0.0003	0.001
AC008268.1-201	1.3665	-1.1071	-2.4736	-5.5543	1.8211e-40	2.5053e-38
AC022034.2-201	-0.1125	0.0906	0.2031	1.1511	1.2188e-05	6.1719e-05
AL021392.1-201	-0.1373	0.1135	0.2508	1.1899	3.6149e-15	7.736e-14
RNF144A-AS1-203	-0.0912	0.0725	0.1637	1.1202	9.321e-09	8.468e-08
MIR4290HG-201	-0.0151	0.0132	0.0283	1.0198	0.0811	0.1234
PRKG1-AS1-202	-0.0316	0.0244	0.056	1.0396	0.0034	0.008
LINC01049-201	-0.0076	0.0035	0.0111	1.0077	0.6714	0.7216
AL136309.2-201	-0.0251	0.0197	0.0447	1.0315	0.0563	0.089
AL161636.1-201	-0.0371	0.0312	0.0683	1.0485	0.0035	0.0081
LINC01741-201	0.0266	-0.0243	-0.0509	-1.0359	0.0922	0.1376
AL606534.4-201	0.0284	-0.0245	-0.0529	-1.0374	0.0052	0.0115
LINC00313-205	-0.0109	0.0099	0.0208	1.0145	0.4046	0.4737
LINC01874-201	-0.0274	0.0253	0.0527	1.0372	0.0144	0.0273
LINC01222-201	-0.0196	0.0149	0.0346	1.0243	0.1051	0.1528
TAF1A-AS1-202	-0.1829	0.1488	0.3317	1.2585	8.2808e-12	1.1902e-10
MED15P9-202	-0.0827	0.0675	0.1502	1.1097	0.005	0.0111
LIMD1-AS1-201	0.0169	-0.0123	-0.0292	-1.0204	0.2274	0.2955
AC099786.2-201	-0.0603	0.0481	0.1084	1.078	0.0005	0.0015
AP001630.1-201	-0.0184	0.0151	0.0335	1.0235	0.2388	0.3087
FRY-AS1-201	-0.0132	0.0096	0.0228	1.016	0.0862	0.1299
DNAJC27-AS1-204	-0.0112	0.0086	0.0199	1.0139	0.3461	0.4192
HMGA1P4-201	-0.1406	0.1087	0.2494	1.1887	8.8237e-09	8.0926e-08
DEPDC1-AS1-201	-0.03	0.0258	0.0558	1.0394	0.0002	0.0006
LINC00348-201	-0.0844	0.0695	0.1539	1.1126	0.0393	0.0649
AL596442.1-201	-0.0703	0.0542	0.1245	1.0901	8.8576e-05	0.0003
MEG9-201	-0.0436	0.0366	0.0802	1.0572	0.04	0.0658
AL078601.2-201	-0.048	0.0405	0.0885	1.0633	5.2167e-05	0.0002
LINC01238-203	-0.0397	0.03	0.0697	1.0495	0.001	0.0027
AL138775.1-201	-0.0042	0.0046	0.0088	1.0061	0.5854	0.6458
LINC01153-201	-0.0378	0.0293	0.0671	1.0476	0.0001	0.0004
LINC00690-201	-0.0216	0.0177	0.0393	1.0276	0.0109	0.0213
LINC01425-202	-0.0144	0.0142	0.0285	1.02	0.3044	0.3797
LINC01770-202	-0.0283	0.0227	0.051	1.036	0.3295	0.4037
LINC01149-202	-0.0142	0.0106	0.0248	1.0173	0.1666	0.227
FAM212B-AS1-201	-0.0043	0.004	0.0084	1.0058	0.7603	0.7985
AC096677.2-201	0.3654	-0.3001	-0.6656	-1.5862	1.7359e-13	2.8333e-12
LBX1-AS1-201	-0.0387	0.0324	0.071	1.0505	0.0004	0.0013
DLG1-AS1-202	-0.0812	0.0674	0.1486	1.1085	3.6138e-07	2.5037e-06
LINC00309-201	-0.007	0.0064	0.0133	1.0093	0.3703	0.442
AL445235.1-201	-0.0639	0.051	0.1148	1.0829	6.5623e-05	0.0003
LINC01352-201	-0.0068	0.007	0.0138	1.0096	0.4053	0.4737
AL137220.1-201	0.0067	-0.0041	-0.0108	-1.0075	0.6236	0.6785
LINC01010-201	-0.0561	0.035	0.0911	1.0652	0.1089	0.1567
LINC00210-201	0.0077	-0.0073	-0.015	-1.0105	0.4489	0.5171
LINC01282-201	-0.0404	0.0322	0.0726	1.0516	0.0009	0.0025
AL513323.1-201	-0.0266	0.0239	0.0504	1.0356	0.0152	0.0286
AL357558.2-201	-0.0167	0.0145	0.0312	1.0219	0.1337	0.1873
HDHD5-AS1-202	-0.0459	0.0369	0.0828	1.059	0.0004	0.0012
AL138733.2-201	-0.0254	0.0231	0.0485	1.0342	0.0223	0.0396
LINC01087-201	-0.0016	0.0026	0.0043	1.003	0.7642	0.8017
AL133410.1-202	0.0092	-0.003	-0.0122	-1.0085	0.7901	0.8229
LINC01598-201	-0.0591	0.0513	0.1104	1.0795	0.0001	0.0005
DSCR10-201	-0.0787	0.0628	0.1416	1.1031	1.1527e-08	1.0184e-07
LINC01981-201	-0.0559	0.0456	0.1015	1.0729	1.4813e-08	1.2968e-07
AL109741.1-201	0.5234	-0.4169	-0.9404	-1.919	8.9589e-41	1.4379e-38
LINC01723-201	-0.0372	0.0277	0.0649	1.046	0.0211	0.038
AL022332.1-202	-0.0065	0.0049	0.0114	1.0079	0.4109	0.4791
LINC00691-201	-0.004	0.002	0.006	1.0042	0.7012	0.7495
TNFRSF14-AS1-202	0.1185	-0.0953	-0.2138	-1.1597	3.9145e-10	4.4402e-09
DPP10-AS1-201	-0.2994	0.2448	0.5442	1.4582	5.8221e-08	4.6337e-07
LINC01844-201	0.0254	-0.0199	-0.0453	-1.0319	0.0333	0.0565
LINC00608-202	-0.0281	0.0208	0.0489	1.0345	0.0506	0.0806
PLCE1-AS2-202	-0.0159	0.0115	0.0275	1.0192	0.214	0.2796
SMG7-AS1-202	-0.0151	0.0083	0.0234	1.0163	0.1974	0.2611
FAM41C-202	0.0215	-0.0181	-0.0396	-1.0279	0.5188	0.5823
AC005281.1-201	-0.0153	0.011	0.0263	1.0184	0.104	0.1517
LINC01797-202	-0.0264	0.0202	0.0466	1.0328	0.0276	0.0484
LINC00441-201	0.02	-0.0152	-0.0353	-1.0248	0.1228	0.1736
AC069277.1-201	-0.1002	0.078	0.1782	1.1315	2.8909e-06	1.6092e-05
AC006372.2-201	-0.0648	0.0517	0.1166	1.0841	0.0003	0.0011
LINC00954-201	-0.0843	0.0698	0.1541	1.1127	6.7437e-05	0.0003
MYCNUT-201	-0.0466	0.0392	0.0858	1.0613	0.0004	0.0013
AC020571.1-202	0.0409	-0.0313	-0.0722	-1.0513	0.1204	0.1713
LINC01700-201	-0.0234	0.0183	0.0417	1.0293	0.1062	0.1534
LINC02580-201	-0.0253	0.0155	0.0408	1.0287	0.145	0.2009
LINC00163-201	0.013	-0.0121	-0.0252	-1.0176	0.2696	0.3425
LINC01852-201	0.1746	-0.1404	-0.3149	-1.244	6.3596e-29	3.8277e-27
STK4-AS1-201	-0.1	0.0822	0.1822	1.1346	3.8789e-11	5.0478e-10
LINC01007-201	0.0653	-0.0584	-0.1237	-1.0895	9.878e-05	0.0004
STK24-AS1-201	-0.0384	0.0326	0.0709	1.0504	0.0018	0.0044
AL162231.2-201	0.0789	-0.0655	-0.1444	-1.1053	1.9994e-05	9.4469e-05
Z82186.1-201	-0.0243	0.0193	0.0435	1.0306	0.0813	0.1234
DNAJC27-AS1-205	-0.0112	0.0086	0.0199	1.0139	0.3461	0.4192
LINC01208-202	-0.1073	0.0807	0.1879	1.1391	4.1635e-10	4.6526e-09
LINC00595-204	-0.0358	0.0272	0.063	1.0446	0.0101	0.02
LINC00460-201	-0.0255	0.0197	0.0452	1.0318	0.0497	0.0794
AC106875.1-202	-0.0877	0.0689	0.1566	1.1147	3.1372e-06	1.7263e-05
MORF4L2-AS1-201	-0.06	0.0511	0.1111	1.08	1.1001e-05	5.6351e-05
RAPGEF4-AS1-202	-0.0353	0.0272	0.0625	1.0443	0.0005	0.0014
LINC00028-201	-0.0696	0.0559	0.1255	1.0909	0.0002	0.0007
AC076966.1-201	0.0016	-0.0006	-0.0022	-1.0015	0.8834	0.9031
LINC01354-202	0.1176	-0.0957	-0.2133	-1.1593	2.6394e-12	4.0344e-11
MIR99AHG-205	0.182	-0.1435	-0.3255	-1.2531	1.3396e-05	6.6839e-05
AL359182.1-201	-0.068	0.0545	0.1225	1.0886	4.9962e-06	2.6879e-05
AL357507.1-201	-0.0326	0.0258	0.0584	1.0413	0.0106	0.0207
C20orf166-AS1-202	-0.0454	0.0343	0.0797	1.0568	0.0029	0.0069
LINC01366-201	-0.0572	0.0441	0.1013	1.0727	3.1403e-05	0.0001
LINC02573-201	-0.0444	0.028	0.0724	1.0514	0.0036	0.0082
AC073133.2-201	0.0058	-0.005	-0.0108	-1.0075	0.5152	0.5796
AC092809.2-202	0.0455	-0.0362	-0.0817	-1.0583	0.0027	0.0064
AC011893.1-201	-0.0278	0.0265	0.0543	1.0384	0.0053	0.0116
AL591368.1-201	-0.0275	0.0216	0.0492	1.0347	0.0072	0.0151
AL157373.2-201	-0.1074	0.0855	0.1929	1.1431	8.7244e-08	6.668e-07
AC011995.1-201	-0.0289	0.0204	0.0493	1.0348	0.0385	0.0639
LINC00242-201	-0.0646	0.0527	0.1173	1.0847	8.436e-05	0.0003
C10orf71-AS1-201	-0.0377	0.0285	0.0662	1.047	0.0089	0.0181
SNHG3-202	-0.1567	0.1297	0.2864	1.2196	1.3043e-07	9.6618e-07
LINC01120-201	-0.0295	0.0206	0.0501	1.0353	0.048	0.077
CASC6-201	-0.0317	0.0251	0.0569	1.0402	0.0031	0.0073
AL162384.1-201	-0.0563	0.0438	0.1	1.0718	0.0695	0.1081
DCTN1-AS1-206	-0.0087	0.0057	0.0144	1.01	0.3715	0.4425
FGF13-AS1-201	0.012	-0.0077	-0.0197	-1.0137	0.3808	0.451
LINC01297-201	-0.2066	0.1654	0.3721	1.2942	2.2048e-07	1.5845e-06
AL445072.1-201	-0.0366	0.0311	0.0677	1.0481	9.7098e-05	0.0004
AC011228.1-201	-0.0365	0.0261	0.0627	1.0444	0.0009	0.0024
AC019117.1-202	1.0847	-0.8787	-1.9634	-3.8997	2.2309e-22	8.9516e-21
LINC01806-202	-0.0795	0.0726	0.1521	1.1112	0.0715	0.1106
AL590683.1-201	0.0027	-0.0025	-0.0051	-1.0036	0.7781	0.8135
RNF217-AS1-201	-0.0123	0.0106	0.0228	1.016	0.1808	0.2441
LINC00415-201	-0.026	0.0195	0.0455	1.032	0.0409	0.0665
AP006216.1-201	0.039	-0.032	-0.0709	-1.0504	0.012	0.0231
AC074183.1-201	0.1266	-0.0967	-0.2234	-1.1674	0.0018	0.0046
AC012494.1-201	-0.0131	0.0099	0.0231	1.0161	0.2595	0.3314
AL118511.1-201	-0.0654	0.0509	0.1163	1.084	3.4958e-05	0.0002
C21orf91-OT1-203	-0.0772	0.0607	0.1379	1.1003	3.4124e-05	0.0002
C9orf135-AS1-201	-0.0524	0.0427	0.0952	1.0682	2.1784e-06	1.2562e-05
AL121672.1-201	-0.0468	0.0343	0.0811	1.0578	0.01	0.0198
MACROD2-AS1-201	-0.0201	0.0174	0.0375	1.0263	0.0305	0.0525
LINC01134-202	-0.117	0.0935	0.2105	1.1571	4.3954e-15	9.2016e-14
AL035448.1-201	-0.0548	0.0482	0.1029	1.074	0.0038	0.0086
U73166.1-201	0.0561	-0.045	-0.1011	-1.0726	0.0059	0.0126
SPATA13-213	-0.0214	0.0164	0.0378	1.0266	0.1737	0.2356
AC105339.1-203	-0.0509	0.0396	0.0904	1.0647	0.0091	0.0183
LINC02574-201	-0.0206	0.0151	0.0357	1.0251	0.1536	0.2117
AP001432.1-201	-0.1102	0.0884	0.1986	1.1476	4.5919e-09	4.422e-08
AL162419.1-201	-0.0268	0.0209	0.0477	1.0336	0.0035	0.0081
KCNQ1-AS1-201	-0.0294	0.0212	0.0507	1.0358	0.0289	0.0504
LINC01692-201	-0.0129	0.0112	0.0241	1.0168	0.0581	0.0911
AL391987.3-201	-0.1311	0.1047	0.2357	1.1775	8.64e-12	1.2236e-10
OSTM1-AS1-202	-0.0249	0.0197	0.0445	1.0314	0.0332	0.0563
LINC01271-201	-0.0272	0.0205	0.0477	1.0336	0.0897	0.1344
SATB2-AS1-202	-0.0373	0.0299	0.0672	1.0477	0.0003	0.0008
ZEB1-AS1-203	-0.2726	0.228	0.5006	1.4148	4.7837e-10	5.1761e-09
LINC01920-201	-0.0341	0.0266	0.0607	1.043	0.0055	0.012
KCNQ1DN-201	-0.0666	0.0492	0.1158	1.0836	0.0024	0.0059
AC097468.1-201	-0.0764	0.0636	0.14	1.1019	6.7322e-07	4.3805e-06
AL353052.2-201	-0.0487	0.04	0.0887	1.0634	3.6883e-06	2.0067e-05
ACVR2B-AS1-201	-0.0085	0.0065	0.0149	1.0104	0.602	0.658
LINC01718-201	-0.0475	0.0345	0.082	1.0585	0.004	0.0091
LINC02243-201	0.0327	-0.0242	-0.0569	-1.0402	0.0032	0.0074
AL023755.1-201	-0.0588	0.0479	0.1067	1.0767	0.0002	0.0007
RPS10P7-201	-0.1362	0.1118	0.248	1.1876	5.8126e-15	1.1424e-13
LINC00315-201	-0.0281	0.0224	0.0505	1.0356	0.0408	0.0665
AC004975.2-201	-0.06	0.0442	0.1042	1.0749	0.0029	0.0069
LINC02264-201	-0.0133	0.0117	0.025	1.0175	0.1895	0.2531
LINC01525-201	-0.022	0.0159	0.0378	1.0266	0.1248	0.1759
MEG8-205	-0.0176	-0.0011	0.0165	1.0115	0.904	0.9203
AC002480.1-201	0.0126	-0.0108	-0.0234	-1.0163	0.3076	0.3819
RFTN1P1-201	0.011	-0.0094	-0.0205	-1.0143	0.3618	0.4344
ENO1-AS1-201	-0.0445	0.0349	0.0794	1.0566	0.0089	0.0181
LINC01134-203	-0.0654	0.0493	0.1147	1.0828	0.001	0.0027
AL157414.2-201	-0.0431	0.0372	0.0803	1.0572	0.0001	0.0005
LINC01679-201	-0.0512	0.0421	0.0933	1.0668	0.0011	0.003
AC073911.1-202	-0.0508	0.0397	0.0905	1.0647	0.0004	0.0012
LINC00656-201	0.0312	-0.0293	-0.0605	-1.0428	0.0141	0.0267
AL442224.1-201	-0.1272	0.1059	0.2331	1.1754	0.0007	0.002
LINC00327-201	0.0145	-0.0126	-0.0271	-1.019	0.244	0.3137
AC010096.1-201	-0.0161	0.0124	0.0285	1.02	0.0705	0.1094
AL391056.1-201	-0.0837	0.063	0.1468	1.1071	0.0007	0.002
AC006372.3-201	-0.0195	0.0142	0.0336	1.0236	0.1387	0.1927
LINC00302-201	-0.0564	0.0455	0.1019	1.0732	4.1761e-05	0.0002
AL109924.1-201	-0.0372	0.0293	0.0666	1.0472	0.0078	0.0162
AC096541.1-201	-0.0438	0.0345	0.0783	1.0557	0.0032	0.0074
Z94160.1-201	-0.038	0.0293	0.0673	1.0477	0.0211	0.0379
LINC01165-201	-0.0394	0.0333	0.0727	1.0517	0.0053	0.0116
AL583839.1-201	-0.0289	0.022	0.0508	1.0358	0.0148	0.028
LINC01015-204	-0.0367	0.0268	0.0635	1.045	0.0029	0.0069
LINC02549-201	-0.064	0.0498	0.1138	1.0821	3.8427e-07	2.606e-06
FOXD2-AS1-201	-0.1101	0.0902	0.2003	1.1489	1.9431e-08	1.6559e-07
SLC25A5-AS1-202	-0.0746	0.0599	0.1345	1.0977	0.0005	0.0014
AC002064.1-201	-0.0138	0.0088	0.0225	1.0157	0.2076	0.2732
LINC01800-201	-0.0341	0.0285	0.0626	1.0443	0.0002	0.0008
FLJ31356-202	-0.0535	0.0442	0.0977	1.0701	6.7679e-06	3.5811e-05
AL139237.1-201	-0.0644	0.052	0.1164	1.084	5.6622e-06	3.0293e-05
PARD3-AS1-201	-0.1277	0.1057	0.2334	1.1756	9.7371e-08	7.3833e-07
AF274858.2-201	-0.0213	0.0144	0.0358	1.0251	0.122	0.1727
SDCBP2-AS1-201	-0.0961	0.0715	0.1676	1.1232	4.2752e-07	2.859e-06
ATP11A-AS1-201	-0.006	0.0065	0.0125	1.0087	0.424	0.4907
AC005772.1-201	-0.0014	-0.0007	0.0006	1.0004	0.9694	0.9755
AC011900.1-201	0.0131	-0.0096	-0.0227	-1.0158	0.0807	0.1229
LINC01186-201	0.0018	-0.0006	-0.0024	-1.0016	0.9362	0.9461
LINC00323-203	-0.0005	-0.0006	-0.0001	-1.0001	0.9945	0.9955
LINC01107-201	-0.0615	0.0512	0.1127	1.0813	7.2933e-05	0.0003
APTR-205	-0.1022	0.0888	0.1909	1.1415	0.0188	0.0341
SNHG7-204	-0.0213	0.0225	0.0438	1.0308	0.3314	0.4055
AC012361.1-201	0.0088	-0.005	-0.0139	-1.0097	0.3418	0.415
AL139275.1-201	-0.02	0.0167	0.0367	1.0258	0.1785	0.2417
LINC00513-201	-0.049	0.0371	0.0862	1.0616	0.0021	0.0052
AP001189.1-201	-0.0731	0.054	0.1271	1.0921	7.8043e-09	7.2474e-08
AC078842.2-201	0.0031	-0.0057	-0.0088	-1.0061	0.625	0.6793
AL121970.1-201	-0.048	0.0402	0.0883	1.0631	0.0009	0.0026
LINC00408-201	-0.0185	0.0095	0.0279	1.0196	0.5175	0.5815
KRBOX1-AS1-201	-0.0319	0.0239	0.0558	1.0395	0.0341	0.0576
AL133319.1-201	-0.008	0.0067	0.0148	1.0103	0.4138	0.4819
AL161646.1-201	-0.0151	0.0113	0.0264	1.0185	0.1642	0.224
LINC00582-201	-0.1488	0.1222	0.271	1.2066	1.0477e-08	9.4289e-08
AL645608.3-201	-0.0943	0.0755	0.1699	1.125	3.2546e-07	2.3045e-06
LINC01809-201	-0.0261	0.0199	0.0461	1.0325	0.0301	0.052
LINC01281-202	-0.0648	0.0529	0.1177	1.085	6.0296e-07	3.95e-06
AL050331.3-201	-0.0072	0.0073	0.0145	1.0101	0.3586	0.4311
AL139350.1-201	-0.0052	0.0052	0.0104	1.0073	0.6004	0.6571
AL050403.1-201	-0.0213	0.0146	0.0359	1.0252	0.0304	0.0525
AP001062.1-201	-0.0161	0.0138	0.0299	1.021	0.5567	0.6205
MIR600HG-201	-0.0258	0.0195	0.0453	1.0319	0.0978	0.1447
LINC02245-201	-0.019	0.0148	0.0338	1.0237	0.1305	0.1834
AP000253.1-201	-0.0398	0.033	0.0728	1.0518	1.9644e-05	9.3647e-05
LINC02575-201	-0.1432	0.1159	0.2591	1.1967	0.0006	0.0017
LINC01831-201	-0.0248	0.0209	0.0457	1.0322	0.0094	0.0188
SORCS3-AS1-201	-0.0338	0.0266	0.0604	1.0428	0.0155	0.0291
AC013733.1-201	0.0013	8.6132e-05	-0.0012	-1.0009	0.9363	0.9461
AL451069.3-201	-0.1239	0.0994	0.2233	1.1674	1.1543e-10	1.4252e-09
LINC00572-201	-0.0003	0.0002	0.0005	1.0004	0.9806	0.9846
TMEM72-AS1-201	-0.086	0.0686	0.1547	1.1132	3.0798e-06	1.7045e-05
AL359924.1-201	-0.0027	0.002	0.0047	1.0032	0.8077	0.8382
AC092634.3-201	-0.0078	0.0057	0.0135	1.0094	0.5889	0.6477
HIPK1-AS1-204	-0.0031	0.0028	0.0058	1.004	0.7133	0.7598
SATB2-AS1-205	-0.0122	0.0085	0.0207	1.0145	0.3219	0.3959
LINC01105-205	-0.006	0.0049	0.0109	1.0076	0.3898	0.4595
AC120114.1-201	-0.0347	0.0308	0.0656	1.0465	1.1081e-05	5.6462e-05
AL161630.1-201	-0.0096	0.0077	0.0173	1.0121	0.3169	0.3907
LINC01813-201	-0.0028	0.0018	0.0046	1.0032	0.7276	0.7708
AL158066.1-201	0.6172	-0.492	-1.1092	-2.1573	7.7389e-25	3.5488e-23
Z97205.1-201	-0.0497	0.0437	0.0934	1.0669	0.0007	0.0019
GLIS3-AS1-201	-0.0533	0.0417	0.095	1.068	0.001	0.0026
AC012368.1-206	-0.0796	0.062	0.1416	1.1031	0.0006	0.0017
LINC00307-201	-0.0144	0.0106	0.025	1.0175	0.1133	0.1629
TLR8-AS1-201	-0.0108	0.0112	0.022	1.0154	0.5868	0.6465
AC007557.1-201	-0.0131	0.01	0.0231	1.0161	0.2407	0.3103
AL157834.2-201	0.0189	-0.0141	-0.033	-1.0231	0.0408	0.0665
LINC00841-201	-0.056	0.0435	0.0995	1.0714	4.3618e-05	0.0002
AC007038.1-201	0.0091	-0.0061	-0.0152	-1.0106	0.3753	0.4451
AC092164.1-201	-0.0116	0.0083	0.0199	1.0139	0.5105	0.575
AL353653.1-201	-0.0627	0.0487	0.1114	1.0803	0.0001	0.0004
LINC01431-203	-0.0169	0.0165	0.0334	1.0234	0.159	0.2172
HNF4A-AS1-201	-0.0056	0.0047	0.0104	1.0072	0.4958	0.5624
LINC01231-201	-0.0324	0.0282	0.0606	1.0429	0.0354	0.0593
LINC01792-201	-0.0387	0.0325	0.0712	1.0506	5.0081e-05	0.0002
AL137802.1-201	0.1257	-0.1051	-0.2308	-1.1735	0.0105	0.0205
AL137005.1-201	-0.0545	0.0383	0.0927	1.0664	0.0002	0.0006
BARX1-AS1-201	-0.0269	0.0201	0.0469	1.0331	0.0429	0.0695
LINC01647-201	-0.0698	0.057	0.1268	1.0918	1.7888e-06	1.0634e-05
ELFN1-AS1-202	-0.0854	0.0643	0.1498	1.1094	8.6372e-05	0.0003
LINC01293-201	-0.0375	0.0293	0.0668	1.0474	0.0158	0.0296
AC019117.1-203	1.0847	-0.8787	-1.9634	-3.8997	2.2309e-22	8.9516e-21
AL135908.1-202	-0.0136	0.0085	0.0221	1.0155	0.298	0.3732
LINC00703-202	-0.004	0.0023	0.0063	1.0044	0.7227	0.7672
LINC01875-201	-0.0685	0.0527	0.1212	1.0876	0.0002	0.0006
DDC-AS1-201	0.0141	-0.0113	-0.0255	-1.0178	0.2313	0.2994
AL691447.2-201	-0.0617	0.0519	0.1135	1.0819	6.3506e-05	0.0003
OLMALINC-201	-0.3877	0.3313	0.7189	1.6459	6.1237e-17	1.4743e-15
AL109615.2-201	-0.0752	0.0565	0.1317	1.0956	8.8434e-06	4.5786e-05
LINC02535-201	-0.0747	0.0589	0.1337	1.0971	1.2158e-06	7.5054e-06
TTTY10-202	0.0113	-0.0128	-0.0241	-1.0169	0.258	0.3299
AL844175.1-201	-0.0268	0.0196	0.0464	1.0327	0.0074	0.0155
LINC01706-201	-0.034	0.0238	0.0578	1.0408	0.0026	0.0064
AC017002.3-201	-0.1961	0.1596	0.3557	1.2796	1.0855e-06	6.788e-06
RPS6KA2-AS1-201	-0.0234	0.0163	0.0397	1.0279	0.1587	0.2172
AL451069.1-201	0.0313	-0.0231	-0.0543	-1.0384	0.1056	0.1534
LINC01056-201	-0.0479	0.0352	0.0831	1.0593	0.0006	0.0017
LINC00894-208	-0.048	0.0412	0.0892	1.0638	0.013	0.0248
LINC01448-201	-0.0108	0.0104	0.0212	1.0148	0.184	0.2475
AL161785.1-201	0.0084	-0.0056	-0.0141	-1.0098	0.5474	0.6123
LINC01653-201	-0.0276	0.0202	0.0478	1.0337	0.0548	0.0868
AC098934.2-201	-0.0095	0.0083	0.0178	1.0124	0.3003	0.3756
TTTY4C-201	-0.0365	0.0299	0.0664	1.0471	0.0014	0.0037
LINC01563-201	-0.0601	0.0475	0.1076	1.0774	0.0003	0.001
LINC01722-201	-0.0215	0.0153	0.0368	1.0258	0.0295	0.0513
TRAF3IP2-AS1-207	0.0258	-0.021	-0.0468	-1.033	0.1372	0.1909
AC234772.2-201	-0.0534	0.0438	0.0972	1.0697	4.4456e-05	0.0002
ELOVL2-AS1-202	-0.053	0.043	0.096	1.0688	0.0003	0.001
LINC00355-201	-0.0546	0.0465	0.1012	1.0726	3.5501e-05	0.0002
ST7-AS1-201	0.2707	-0.2186	-0.4894	-1.4038	8.2961e-18	2.1024e-16
LINC00445-202	-0.0179	0.0158	0.0336	1.0236	0.1333	0.1872
TRPM2-AS-202	-0.0438	0.0307	0.0745	1.053	0.0138	0.0264
MIR155HG-201	0.4619	-0.3721	-0.834	-1.7826	4.2516e-10	4.6526e-09
LINC01657-201	-0.0042	0.0044	0.0086	1.006	0.6308	0.6849
AC079922.2-201	-0.0897	0.0753	0.165	1.1212	0.0001	0.0005
LINC01883-201	-0.0229	0.0192	0.0421	1.0296	0.0307	0.0528
LINC01812-201	-0.0549	0.0439	0.0988	1.0709	3.9224e-05	0.0002
FP325330.1-201	-0.068	0.0531	0.1211	1.0876	2.1412e-06	1.2421e-05
AP000696.1-201	0.021	-0.015	-0.0359	-1.0252	0.2085	0.2739
AL021396.1-202	0.003	-0.002	-0.0051	-1.0035	0.8141	0.8439
AP006216.2-201	-0.0077	0.0043	0.0119	1.0083	0.6613	0.7129
LINC02530-201	-0.0255	0.0225	0.048	1.0338	0.0048	0.0107
AL358473.1-202	-0.0514	0.0413	0.0927	1.0663	5.8646e-05	0.0002
LINC01013-205	0.0101	-0.0091	-0.0193	-1.0134	0.3367	0.4099
AL122019.1-202	-0.0481	0.0409	0.089	1.0636	3.3657e-07	2.3487e-06
AL606760.1-201	-0.1269	0.1054	0.2322	1.1746	1.0998e-10	1.3754e-09
TNK2-AS1-201	-0.0209	0.0159	0.0368	1.0259	0.0756	0.1163
GJA10-202	-0.0545	0.0392	0.0936	1.0671	0.0028	0.0067
AC226101.2-201	0.2003	-0.1666	-0.3669	-1.2896	2.0578e-19	6.1926e-18
Z99756.1-201	-0.0167	0.0117	0.0284	1.0199	0.148	0.2048
AC005224.1-201	-0.0248	0.022	0.0468	1.0329	0.079	0.121
Z82195.2-202	-0.0331	0.0274	0.0605	1.0428	0.0024	0.0058
AC007009.1-201	-0.144	0.1208	0.2649	1.2015	0.001	0.0026
LINC02070-201	0.0017	-0.0015	-0.0032	-1.0022	0.8196	0.8477
ADAMTS9-AS2-201	0.0187	-0.0136	-0.0323	-1.0227	0.1541	0.2117
LINC02085-201	-0.0238	0.0217	0.0455	1.032	0.0041	0.0093
NDUFB2-AS1-201	0.032	-0.0206	-0.0526	-1.0371	0.1925	0.256
FOXP1-AS1-201	-0.0212	0.0138	0.035	1.0246	0.1184	0.1691
AC147067.1-201	0.0223	-0.0275	-0.0499	-1.0352	0.2293	0.2971
C3orf85-201	-0.0161	0.0133	0.0294	1.0206	0.1007	0.148
LINC00698-203	-0.0553	0.0473	0.1026	1.0737	2.0012e-05	9.4469e-05
AC092910.3-202	-0.127	0.105	0.232	1.1744	1.8497e-08	1.5904e-07
LINC02029-201	0.006	-0.0055	-0.0115	-1.008	0.5699	0.6315
AC008040.1-204	-0.0639	0.0521	0.116	1.0837	4.1914e-07	2.8226e-06
LINC00173-201	-0.0553	0.0462	0.1015	1.0729	0.0002	0.0006
MYLK-AS1-202	-0.0962	0.0797	0.176	1.1297	1.0563e-05	5.4397e-05
LINC00880-201	-0.0762	0.06	0.1361	1.099	8.1005e-08	6.3421e-07
PSMD6-AS2-201	0.2009	-0.1594	-0.3603	-1.2837	5.8925e-12	8.73e-11
LINC02023-201	-0.0111	0.009	0.0202	1.0141	0.21	0.2755
AC004690.2-201	-0.0183	0.014	0.0323	1.0227	0.0757	0.1163
DUBR-203	0.276	-0.2124	-0.4884	-1.4029	3.3267e-07	2.3384e-06
LINC00973-201	-0.0659	0.0553	0.1212	1.0876	0.0095	0.0189
LINC00115-201	-0.131	0.1163	0.2473	1.187	2.4753e-07	1.7657e-06
AC082651.3-201	-0.0322	0.0257	0.0578	1.0409	0.0007	0.002
LINC00852-201	0.1048	-0.0864	-0.1913	-1.1418	1.2688e-15	2.777e-14
AC021074.3-201	-0.0081	0.0078	0.016	1.0111	0.3969	0.4662
AC074386.1-201	0.3788	-0.3062	-0.685	-1.6077	3.6408e-21	1.209e-19
IGSF11-AS1-201	-0.0006	0.0013	0.0019	1.0013	0.8832	0.9031
LINC00996-201	0.1172	-0.0929	-0.2101	-1.1568	3.3768e-09	3.3525e-08
AC082651.1-201	-0.0459	0.0311	0.077	1.0548	0.011	0.0214
AC093627.4-202	0.0593	-0.0558	-0.1151	-1.083	0.106	0.1534
LINC00518-202	-0.0367	0.0297	0.0664	1.0471	0.0129	0.0246
MNX1-AS1-201	-0.2018	0.1646	0.3664	1.2891	2.7578e-12	4.1496e-11
ADAMTS9-AS2-203	0.271	-0.2171	-0.4881	-1.4026	1.547e-34	1.3544e-32
LINC02042-201	-0.0591	0.0455	0.1046	1.0752	6.1211e-08	4.8317e-07
AC093010.2-201	0	0.0019	0.002	1.0014	0.9269	0.9406
LINC00477-201	-0.0065	0.0049	0.0114	1.0079	0.4748	0.5424
AC006252.1-201	-0.0869	0.0674	0.1543	1.1129	3.8903e-05	0.0002
AC092910.3-201	0.0058	-0.0046	-0.0104	-1.0072	0.4851	0.5508
AC093627.4-201	0.0593	-0.0558	-0.1151	-1.083	0.106	0.1534
AC109466.1-209	-0.0293	0.0246	0.0539	1.0381	0.0271	0.0477
AC117394.2-201	-0.0121	0.012	0.0241	1.0168	0.1232	0.1739
LINC02016-201	0.0784	-0.0663	-0.1447	-1.1055	1.6186e-08	1.4042e-07
AC002310.2-202	-0.1146	0.0911	0.2057	1.1532	1.3323e-11	1.8328e-10
AC093010.2-202	0	0.0019	0.002	1.0014	0.9269	0.9406
LINC00488-201	-0.0059	0.005	0.0109	1.0076	0.4315	0.4988
LINC02047-201	-0.0498	0.0411	0.0909	1.065	4.9591e-07	3.2935e-06
TCL6-210	-0.0249	0.022	0.0468	1.033	0.018	0.033
SUCLG2-AS1-203	-0.0228	0.0158	0.0386	1.0271	0.1885	0.2521
LINC01213-202	-0.0589	0.0489	0.1078	1.0776	0.0004	0.0012
FOXP1-IT1-201	0.0738	-0.0512	-0.125	-1.0905	0.0163	0.0303
SBF2-AS1-201	-0.5393	0.4419	0.9812	1.9741	8.2968e-26	3.9949e-24
LINC00682-201	-0.0296	0.0208	0.0504	1.0355	0.0077	0.016
AL049840.1-201	-0.0521	0.0377	0.0898	1.0643	0.002	0.0049
LINC00682-202	-0.0296	0.0208	0.0504	1.0355	0.0077	0.016
AC099508.1-201	0.0056	-0.0057	-0.0113	-1.0079	0.6695	0.7204
AC022113.1-201	-0.0197	0.0133	0.033	1.0231	0.0799	0.1221
SEC24B-AS1-201	-0.0048	0.0083	0.0132	1.0092	0.6618	0.7129
AP001922.1-201	0.0314	-0.0267	-0.0582	-1.0411	0.0013	0.0033
LINC02273-201	-0.028	0.0154	0.0435	1.0306	0.1546	0.212
AC008966.1-203	-0.0237	0.0217	0.0454	1.032	0.1687	0.2291
PLA2G4E-AS1-201	0.0005	0.0014	0.001	1.0007	0.9506	0.9596
AC083805.1-201	-0.054	0.0421	0.0961	1.0689	0.0006	0.0017
DNAJC3-AS1-201	-0.1131	0.1008	0.2139	1.1598	7.2361e-05	0.0003
LINC002481-201	0.0898	-0.0716	-0.1615	-1.1184	0.0003	0.0009
Z84485.1-202	0.0017	-0.0016	-0.0033	-1.0023	0.7887	0.8229
RRS1-AS1-201	-0.0064	0.0055	0.0119	1.0083	0.3693	0.4418
UBR5-AS1-201	0.3511	-0.2769	-0.628	-1.5454	5.3914e-15	1.0816e-13
MGC16275-201	-0.0114	0.0212	0.0326	1.0229	0.7192	0.7653
AC012377.1-201	-0.0147	0.0112	0.026	1.0181	0.1147	0.1646
LINC00900-201	-0.1165	0.0866	0.203	1.1511	1.6197e-05	7.9579e-05
LINC02325-201	-0.0209	0.018	0.0389	1.0273	0.0577	0.0907
GPRC5D-AS1-202	-0.4449	0.3631	0.808	1.7508	6.4245e-18	1.6721e-16
LINC00920-201	0.0928	-0.0894	-0.1822	-1.1346	4.4941e-05	0.0002
AC107067.1-201	-0.0228	0.0167	0.0395	1.0278	0.1174	0.1679
CSTF3-AS1-201	0.0075	-0.0058	-0.0133	-1.0092	0.3101	0.3844
AC010198.1-201	-0.0011	0.002	0.0031	1.0021	0.804	0.8362
FLJ31104-201	0.0164	-0.0144	-0.0307	-1.0215	0.1192	0.1701
AC092378.1-202	0.0054	-0.0036	-0.009	-1.0063	0.6405	0.6946
AC087667.1-201	-0.003	0.0016	0.0046	1.0032	0.8192	0.8477
AC113382.1-201	-0.027	0.0203	0.0473	1.0333	0.0238	0.0421
SNHG10-201	-0.0349	0.0313	0.0661	1.0469	0.0087	0.0177
LINC02458-201	-0.0188	0.0142	0.033	1.0232	0.1063	0.1534
MIR210HG-201	-0.3255	0.2672	0.5928	1.5081	1.4657e-18	4.1332e-17
LINC01585-201	-0.015	0.0099	0.0249	1.0174	0.2865	0.3614
DDX11-AS1-201	-0.0419	0.0337	0.0757	1.0539	1.8642e-06	1.1014e-05
AP000802.1-201	-0.0319	0.0279	0.0598	1.0423	0.03	0.052
AP000873.2-208	-0.0961	0.0798	0.1759	1.1296	9.9967e-05	0.0004
AC022075.1-201	-0.7087	0.5722	1.2809	2.4299	8.8894e-17	2.0382e-15
DACT3-AS1-201	-0.0156	0.0107	0.0263	1.0184	0.2879	0.3624
AC090061.1-201	-0.0499	0.0426	0.0926	1.0663	0.0002	0.0008
AC026250.1-201	-0.1368	0.1129	0.2497	1.189	1.331e-12	2.0674e-11
NRAV-201	0.0831	-0.0649	-0.1479	-1.108	0.0078	0.0162
GS1-24F4.2-201	-0.0166	0.0159	0.0325	1.0228	0.087	0.1306
AC100861.1-202	-0.1118	0.0906	0.2024	1.1506	1.3548e-11	1.8375e-10
AC090515.2-201	0.0582	-0.0458	-0.104	-1.0748	0.0004	0.0013
AC092718.1-201	-0.0108	0.0126	0.0234	1.0163	0.0987	0.1456
NEAT1-202	-0.1338	0.1091	0.2428	1.1833	0.0959	0.1423
AC018797.2-201	-0.0732	0.0585	0.1317	1.0956	0.0003	0.0009
AC044802.1-201	-0.0157	0.0126	0.0282	1.0198	0.0837	0.1265
LINC00535-201	-0.0695	0.0558	0.1253	1.0907	1.6698e-06	1.005e-05
AC087521.1-201	-0.0885	0.0743	0.1628	1.1195	1.5614e-07	1.1478e-06
AC091948.1-201	0.004	-0.0043	-0.0083	-1.0058	0.7234	0.7672
AC005920.1-201	-0.0059	0.0012	0.0071	1.0049	0.6967	0.7462
AC107959.2-201	-0.011	0.012	0.023	1.0161	0.3031	0.3786
CKMT2-AS1-202	-0.0448	0.0436	0.0884	1.0632	0.0982	0.145
AC046130.1-201	-0.0671	0.0558	0.1229	1.0889	5.8154e-05	0.0002
AC096746.1-201	-0.0285	0.025	0.0535	1.0378	0.0033	0.0078
AC107959.1-202	0.1736	-0.1477	-0.3213	-1.2494	1.5022e-18	4.1332e-17
AC009060.1-202	-0.0252	0.0204	0.0456	1.0321	0.0077	0.016
AC009292.1-201	-0.0775	0.0587	0.1362	1.099	4.3854e-05	0.0002
AC008781.2-201	-0.0225	0.0182	0.0407	1.0286	0.0227	0.0402
AC055717.1-201	-0.1085	0.0878	0.1963	1.1458	4.2422e-10	4.6526e-09
LINC01267-201	0.0027	-0.0017	-0.0044	-1.0031	0.847	0.8723
AL139353.2-202	-0.0103	0.0082	0.0186	1.013	0.1942	0.2577
AC004590.1-201	-0.0699	0.0533	0.1232	1.0892	1.2271e-05	6.1719e-05
FGF10-AS1-201	0.0034	-0.0018	-0.0052	-1.0036	0.8077	0.8382
LINC01085-201	-0.0074	0.0068	0.0141	1.0099	0.3357	0.4098
AC036214.1-201	-0.0334	0.0289	0.0623	1.0441	0.0083	0.017
HHIP-AS1-201	0.7152	-0.5722	-1.2873	-2.4408	6.3645e-39	6.81e-37
AC112204.2-201	-0.0959	0.0737	0.1696	1.1248	1.0675e-08	9.5184e-08
AC109349.1-201	-0.0071	0.0064	0.0134	1.0093	0.4788	0.5447
AC008443.4-201	-0.4184	0.3446	0.763	1.697	1.8137e-10	2.1563e-09
NOP14-AS1-201	0.0564	-0.0456	-0.102	-1.0732	2.4385e-06	1.3814e-05
LINC02114-201	-0.0261	0.0217	0.0478	1.0337	0.0058	0.0123
LINC02148-201	0.0249	-0.018	-0.0429	-1.0302	0.0326	0.0556
LINC02431-201	-0.0507	0.0415	0.0922	1.066	6.6056e-05	0.0003
AC023794.1-201	-0.0183	0.0151	0.0334	1.0234	0.2776	0.3513
LINC00958-201	-0.2075	0.1687	0.3761	1.2979	9.3292e-15	1.7616e-13
PCAT4-201	-0.0413	0.0324	0.0737	1.0524	0.0005	0.0015
LINC02239-201	-0.0209	0.0117	0.0326	1.0228	0.4502	0.518
NPHP3-AS1-202	-0.0056	0.0044	0.01	1.0069	0.6764	0.7261
AP002884.3-201	-0.0666	0.0512	0.1178	1.0851	0.0001	0.0004
AP000866.2-201	0.7021	-0.5611	-1.2632	-2.4003	2.9186e-46	9.3685e-44
AC016687.3-202	-0.025	0.0221	0.0471	1.0332	0.0057	0.0122
LINC01019-201	-0.0134	0.0129	0.0264	1.0185	0.186	0.2498
AC025171.2-202	0.1779	-0.1452	-0.3232	-1.2511	7.7987e-06	4.0816e-05
AC012339.1-201	0.0047	-0.0041	-0.0088	-1.0061	0.5194	0.5823
AC092546.1-202	-0.0433	0.0358	0.0791	1.0564	0.0016	0.0041
AL121796.1-201	-0.0415	0.0367	0.0782	1.0557	0.0022	0.0053
TMEM108-AS1-202	-0.0073	0.0039	0.0112	1.0078	0.6164	0.6714
CACNA1G-AS1-202	-0.0415	0.0346	0.0761	1.0542	0.006	0.0129
AC018682.1-201	-0.0534	0.0431	0.0966	1.0692	0.0003	0.0011
AC007663.2-201	0.0385	-0.0335	-0.072	-1.0512	0.0321	0.0549
LINC01957-201	-0.0088	0.0077	0.0165	1.0115	0.386	0.4561
LINC02059-202	-0.0057	0.0045	0.0102	1.0071	0.4236	0.4907
AC109830.1-203	0.0006	-0.0007	-0.0013	-1.0009	0.9349	0.9461
PART1-202	-0.3707	0.2981	0.6688	1.5897	7.6349e-15	1.4705e-13
AC078881.1-201	0.0194	-0.0141	-0.0335	-1.0235	0.05	0.0798
LINC02172-201	-0.0263	0.0234	0.0497	1.0351	0.012	0.0231
AC113410.2-201	-0.0374	0.03	0.0674	1.0478	0.0034	0.0078
TRIM52-AS1-202	0.0519	-0.0394	-0.0913	-1.0653	0.02	0.0361
LINC02145-202	0.0095	-0.0105	-0.0201	-1.014	0.349	0.4212
AC110760.2-201	-0.0489	0.0373	0.0862	1.0615	0.0006	0.0018
LINC02221-201	-0.024	0.0184	0.0424	1.0299	0.006	0.0129
AC117500.2-201	-0.0067	0.0079	0.0146	1.0102	0.4754	0.5424
AL133372.2-203	0.0114	-0.0096	-0.0211	-1.0147	0.3151	0.3895
LINC02381-201	-0.1291	0.1013	0.2304	1.1731	0.0461	0.0742
LINC02171-201	-0.0751	0.056	0.1311	1.0951	1.4407e-05	7.1147e-05
AC008525.1-201	-0.0487	0.0402	0.089	1.0636	2.437e-05	0.0001
LINC02119-201	-0.0168	0.0152	0.032	1.0224	0.0739	0.1139
SMAD1-AS2-201	-0.0252	0.0209	0.0461	1.0325	0.0043	0.0096
AC092335.1-201	0.0095	-0.0119	-0.0214	-1.0149	0.4177	0.4852
AC104958.1-201	-0.029	0.0232	0.0522	1.0368	0.011	0.0214
LINC02116-201	-0.0167	0.0145	0.0311	1.0218	0.0691	0.1077
LINC02510-201	0.0107	-0.0077	-0.0184	-1.0128	0.2661	0.3389
LINC02493-201	-0.0453	0.0392	0.0846	1.0604	0.0005	0.0014
LINC02199-202	-0.015	0.0135	0.0285	1.0199	0.2116	0.2768
AC139493.2-202	-0.0883	0.0743	0.1626	1.1193	6.3368e-05	0.0003
LINC02225-201	-0.0118	0.0082	0.02	1.014	0.0961	0.1423
LINC01234-201	-0.0254	0.0213	0.0467	1.0329	0.0186	0.0339
AC096736.3-201	0.0031	-0.0012	-0.0043	-1.003	0.7046	0.7523
LINC02380-201	-0.0104	0.0041	0.0145	1.0101	0.5669	0.6289
AP003555.1-202	-0.1039	0.083	0.1868	1.1383	1.2893e-09	1.3069e-08
AC096734.1-201	-0.0434	0.0353	0.0787	1.056	4.9762e-05	0.0002
LINC02149-201	-0.0269	0.0213	0.0482	1.034	0.0066	0.014
AP003716.1-202	0.2665	-0.2163	-0.4827	-1.3974	1.0388e-07	7.7551e-07
AC104827.1-202	-0.0303	0.0224	0.0527	1.0372	0.0347	0.0583
AC141928.1-201	-0.0305	0.0218	0.0524	1.037	0.0571	0.0901
LINC01365-202	-0.038	0.0248	0.0628	1.0445	0.0092	0.0184
HHIP-AS1-203	0.7152	-0.5722	-1.2873	-2.4408	6.3645e-39	6.81e-37
LINC00290-201	-0.0104	0.0098	0.0202	1.0141	0.2713	0.3443
LINC02475-202	-0.0682	0.0539	0.1221	1.0883	0.0012	0.0032
AC023136.1-201	-0.0226	0.0198	0.0424	1.0298	0.0028	0.0067
LINC02150-201	-0.0364	0.0286	0.065	1.0461	0.0005	0.0015
PURPL-205	-0.0057	0.0048	0.0104	1.0073	0.7201	0.7654
AC092611.1-201	-0.0785	0.0623	0.1409	1.1026	0.0006	0.0018
AC093909.4-201	0.0073	-0.0039	-0.0112	-1.0078	0.4539	0.521
CTD-2194D22.4-201	-0.0241	0.0184	0.0425	1.0299	0.0176	0.0325
FOXD1-AS1-201	-0.0387	0.0344	0.0731	1.052	0.0093	0.0186
LINC02071-201	-0.0182	0.0129	0.0311	1.0218	0.2503	0.3205
AC097537.1-201	-0.0187	0.0138	0.0325	1.0228	0.0726	0.1121
LINC02123-201	-0.0207	0.0188	0.0395	1.0277	0.0216	0.0386
LINC00605-201	-0.0456	0.0381	0.0837	1.0598	0.001	0.0027
LINC01618-201	-0.0225	0.0191	0.0415	1.0292	0.031	0.0532
LINC02353-201	-0.0048	0.0043	0.0091	1.0064	0.572	0.6332
AC097375.3-201	-0.0016	0.0017	0.0033	1.0023	0.8534	0.8781
AC109830.1-202	0.0006	-0.0007	-0.0013	-1.0009	0.9349	0.9461
FLJ12825-201	-0.0355	0.025	0.0605	1.0428	0.004	0.009
LINC01091-204	0.0408	-0.0318	-0.0726	-1.0516	0.0065	0.0138
LINC02382-201	-0.0551	0.0443	0.0994	1.0713	9.3689e-05	0.0004
SLIT2-IT1-201	0.0007	-0.0018	-0.0025	-1.0017	0.8827	0.9031
AC008663.2-201	-0.032	0.0255	0.0575	1.0406	0.0104	0.0205
LINC02099-201	-0.0321	0.0219	0.054	1.0381	0.0337	0.057
LINC00051-201	-0.0205	0.0175	0.038	1.0267	0.0329	0.0561
MIR3142HG-201	0.1237	-0.1068	-0.2305	-1.1733	0.0008	0.0022
CARMN-205	0.3723	-0.2985	-0.6708	-1.592	8.4754e-11	1.0739e-09
ZFHX4-AS1-201	-0.0502	0.0341	0.0843	1.0602	0.1157	0.1658
LINC01845-201	-0.0391	0.0314	0.0705	1.0501	0.0002	0.0008
FER1L6-AS1-201	-0.0102	0.006	0.0162	1.0113	0.3944	0.4638
LINC01111-201	-0.0134	0.0099	0.0233	1.0163	0.3524	0.4242
AC104051.2-201	-0.0303	0.0234	0.0536	1.0379	0.0216	0.0386
LINC01289-201	-0.0116	0.0087	0.0203	1.0142	0.2768	0.3507
AC025524.2-211	-0.0291	0.0225	0.0517	1.0365	0.0019	0.0047
AC021355.1-202	-0.0367	0.0258	0.0625	1.0443	0.0165	0.0305
EXTL3-AS1-203	0.0087	-0.0057	-0.0144	-1.01	0.497	0.5631
AC022784.6-204	-0.0306	0.025	0.0557	1.0394	0.0009	0.0024
HPYR1-201	-0.0302	0.0254	0.0557	1.0393	0.0417	0.0677
LINC00588-201	-0.0017	0.0043	0.006	1.0042	0.7335	0.7754
PVT1-212	-0.033	0.0279	0.0609	1.0431	0.0053	0.0116
AC091946.1-201	-0.0275	0.0242	0.0517	1.0365	0.0016	0.004
LINC01419-201	-0.2697	0.2249	0.4946	1.4089	0.0004	0.0011
LINC02153-202	-0.0393	0.0307	0.0701	1.0498	0.0089	0.018
AC016065.1-203	-0.2189	0.1801	0.399	1.3186	6.3347e-17	1.4879e-15
AC004080.2-201	-0.0703	0.0554	0.1258	1.0911	3.3273e-05	0.0001
AC019270.1-201	-0.0129	0.0133	0.0262	1.0183	0.1916	0.2556
AC138356.3-201	-0.0142	0.0147	0.0289	1.0202	0.0806	0.1229
AC090921.1-201	-0.0339	0.026	0.0599	1.0424	0.0017	0.0043
AC037486.1-201	-0.0381	0.0283	0.0664	1.0471	0.02	0.0361
OTUD6B-AS1-202	0.0885	-0.0677	-0.1562	-1.1144	0.017	0.0314
AC100800.1-201	-0.0102	0.0061	0.0163	1.0113	0.4029	0.4726
HOXA-AS3-205	-0.0757	0.0567	0.1324	1.0961	0.0008	0.0022
AC068858.1-201	-0.0724	0.0561	0.1285	1.0932	5.853e-05	0.0002
AP002957.1-203	-0.0455	0.0377	0.0832	1.0594	0.0004	0.0011
RAB30-AS1-202	-0.1656	0.1411	0.3067	1.2369	7.7608e-05	0.0003
AP003110.1-201	0.009	-0.0075	-0.0166	-1.0115	0.394	0.4638
ZNF252P-AS1-201	-0.0388	0.0298	0.0685	1.0487	8.08e-05	0.0003
AC010624.1-201	0.0401	-0.0319	-0.072	-1.0511	0.0016	0.004
AC005833.1-201	-0.0536	0.0407	0.0944	1.0676	0.0006	0.0017
AP000873.2-209	-0.0961	0.0798	0.1759	1.1296	9.9967e-05	0.0004
TBX5-AS1-201	0.8999	-0.7256	-1.6255	-3.0855	3.145e-54	3.0287e-51
AP002008.3-201	-0.0043	0.0041	0.0083	1.0058	0.6926	0.7427
AP000873.2-207	-0.0961	0.0798	0.1759	1.1296	9.9967e-05	0.0004
AP002008.1-201	-0.0394	0.0291	0.0685	1.0486	0.0056	0.012
AC103796.1-201	-0.0074	0.0044	0.0118	1.0082	0.5556	0.6199
TOLLIP-AS1-201	-0.0325	0.0254	0.0579	1.041	0.2423	0.312
AC105219.1-201	-0.0192	0.0127	0.0319	1.0224	0.2636	0.3363
TRAF3IP2-AS1-209	-0.0008	0.0014	0.0022	1.0015	0.8647	0.8887
AP000911.1-202	-0.0321	0.0235	0.0556	1.0393	0.0165	0.0305
NAV2-AS4-201	-0.0717	0.0515	0.1233	1.0892	0.0001	0.0005
KIRREL3-AS2-201	0.0217	-0.0193	-0.0409	-1.0288	0.0454	0.0733
RAB30-AS1-207	-0.0682	0.0635	0.1318	1.0956	0.0162	0.0302
CASC23-201	-0.029	0.0218	0.0507	1.0358	0.0388	0.0644
LINC02282-201	-0.0285	0.0238	0.0523	1.0369	0.0164	0.0305
PXN-AS1-201	-0.2691	0.2237	0.4928	1.4072	2.4074e-14	4.3741e-13
LINC02419-201	-0.0022	0.0026	0.0048	1.0033	0.7682	0.8049
LINC00943-203	-0.0137	0.0101	0.0238	1.0166	0.4554	0.5215
CLIP1-AS1-201	-0.0478	0.034	0.0818	1.0583	0.0003	0.001
AC007368.1-201	-0.0112	0.004	0.0152	1.0106	0.3843	0.4546
LINC00944-201	-0.0378	0.0294	0.0672	1.0477	0.001	0.0027
LINC02443-201	-0.0297	0.022	0.0517	1.0365	0.0356	0.0595
AC005885.1-205	-0.0493	0.0403	0.0895	1.064	1.6506e-05	8.0687e-05
AC117500.3-201	-0.0114	0.0082	0.0196	1.0137	0.3727	0.4432
LINC00943-204	-0.0137	0.0101	0.0238	1.0166	0.4554	0.5215
AC006065.4-204	-0.0109	0.0102	0.0211	1.0147	0.3227	0.3959
AC021054.1-201	0.0729	-0.0543	-0.1272	-1.0921	0.0002	0.0005
AC073862.1-201	0.1861	-0.151	-0.3371	-1.2632	4.7548e-22	1.8315e-20
AC087235.1-201	-0.0102	0.0063	0.0165	1.0115	0.3078	0.3819
MRGPRF-AS1-201	-0.0223	0.0175	0.0397	1.0279	0.2398	0.3096
AC069503.1-201	0.0429	-0.0293	-0.0723	-1.0514	0.2502	0.3205
AC156455.1-201	-0.0231	0.0213	0.0445	1.0313	0.504	0.5684
LINC02387-201	-0.1003	0.076	0.1764	1.13	7.9823e-06	4.1551e-05
AC006065.3-201	-0.0109	0.0102	0.0211	1.0147	0.3227	0.3959
LINC02421-201	0.0022	-0.0021	-0.0043	-1.003	0.8464	0.8723
TMEM132D-AS2-201	-0.0204	0.0156	0.036	1.0253	0.0349	0.0586
ADGRD1-AS1-202	-0.0117	0.0158	0.0275	1.0192	0.7592	0.7981
SMCR5-201	-0.0219	0.0154	0.0374	1.0262	0.0538	0.0855
LINC02350-201	-0.018	0.0153	0.0333	1.0233	0.0961	0.1423
AC018653.3-201	-0.0398	0.0267	0.0665	1.0472	0.0054	0.0117
LINC02375-201	0.0038	-0.0037	-0.0075	-1.0052	0.5758	0.6366
AC007622.2-202	-0.0219	0.0174	0.0394	1.0277	0.0187	0.034
AC068888.1-207	-0.0644	0.0517	0.1161	1.0838	0.002	0.0049
LINC00485-201	-0.0072	0.0078	0.015	1.0104	0.1925	0.256
AC079385.2-201	-0.0251	0.0208	0.046	1.0324	0.0476	0.0764
AC117377.1-201	-0.0417	0.0303	0.072	1.0511	0.0005	0.0014
LINC01234-202	-0.361	0.293	0.6541	1.5736	1.2901e-10	1.5529e-09
MIR4307HG-201	-0.0455	0.0391	0.0846	1.0604	0.0002	0.0007
AC023509.2-201	0.1483	-0.1181	-0.2664	-1.2028	1.2947e-21	4.6177e-20
LINC02424-201	-0.0023	0.0012	0.0035	1.0024	0.7771	0.8134
CASC18-202	-0.0253	0.0212	0.0464	1.0327	0.0184	0.0337
AC089998.1-201	-0.0102	0.0068	0.017	1.0118	0.3676	0.4403
TMPO-AS1-202	-0.3097	0.2503	0.56	1.4743	6.9287e-27	3.9249e-25
AC091534.1-201	-0.0181	0.0121	0.0301	1.0211	0.0875	0.1312
RMST-205	-0.0045	0.0035	0.008	1.0055	0.7131	0.7598
AC117498.2-202	-0.0683	0.0574	0.1257	1.091	0.0002	0.0007
AC012085.2-201	0.0111	-0.0084	-0.0195	-1.0136	0.3115	0.3855
TRHDE-AS1-204	0.0949	-0.0733	-0.1682	-1.1236	1.2364e-11	1.7255e-10
LINC02402-201	0.004	-0.0024	-0.0063	-1.0044	0.7312	0.7738
LINC02426-201	-0.0313	0.0246	0.0559	1.0395	0.0009	0.0024
LINC02388-201	-0.016	0.0124	0.0284	1.0199	0.2912	0.3662
AL589743.1-201	-0.0369	0.03	0.0669	1.0475	0.002	0.0051
AC011611.3-201	-0.032	0.0271	0.059	1.0418	0.0048	0.0107
AC087897.2-201	-0.0164	0.0134	0.0299	1.0209	0.1883	0.2521
AC027288.3-203	0.8608	-0.7005	-1.5614	-2.9513	5.1962e-51	2.502e-48
AL137786.1-201	-0.0181	0.0128	0.0309	1.0217	0.1831	0.2466
ITPK1-AS1-201	-0.0307	0.0247	0.0554	1.0392	0.0008	0.0022
AL139193.2-201	-0.0518	0.0384	0.0901	1.0645	0.0006	0.0018
LINC02318-201	0.0049	-0.0022	-0.0071	-1.0049	0.5798	0.6403
DIO2-AS1-201	-0.0467	0.0382	0.0848	1.0606	0.001	0.0026
FOXN3-AS2-201	0.0137	-0.0099	-0.0236	-1.0165	0.3066	0.3819
CRAT37-201	0.0001	0.0018	0.0017	1.0012	0.8998	0.9177
SNHG14-221	-0.0256	0.0223	0.0479	1.0337	0.1932	0.2567
FAM181A-AS1-202	-0.0495	0.041	0.0905	1.0647	1.7953e-05	8.688e-05
LINC02274-201	-0.0245	0.0206	0.0451	1.0318	0.0165	0.0306
LINC00638-201	-0.0944	0.0768	0.1712	1.126	1.01e-06	6.357e-06
AL121809.1-201	-0.0552	0.0407	0.0959	1.0688	0.0068	0.0143
AL096869.2-202	0.0156	-0.0098	-0.0254	-1.0177	0.2035	0.2684
AL355922.2-201	-0.0903	0.0752	0.1655	1.1216	8.3536e-08	6.4666e-07
LINC00645-203	-0.0378	0.0305	0.0684	1.0485	0.145	0.2009
AL117192.1-202	-0.0291	0.024	0.0531	1.0375	0.0049	0.0108
AC015914.1-201	0.0733	-0.0539	-0.1272	-1.0922	1.2305e-05	6.1719e-05
ZNF710-AS1-201	0.2385	-0.1906	-0.4291	-1.3464	1.8112e-09	1.8168e-08
LINC01581-202	-0.0061	0.0025	0.0086	1.006	0.5949	0.6532
EWSAT1-206	-0.0203	0.0166	0.0369	1.0259	0.201	0.2655
AC105133.1-201	-0.0184	0.0132	0.0316	1.0222	0.0992	0.146
INAFM2-201	0.2932	-0.241	-0.5342	-1.4482	1.4106e-23	6.1745e-22
CERNA1-202	-0.0336	0.0287	0.0623	1.0441	0.0017	0.0044
AC022613.3-201	0.2047	-0.1688	-0.3735	-1.2955	2.4357e-10	2.8259e-09
AC104590.1-201	-0.0383	0.0321	0.0704	1.05	5.6714e-05	0.0002
AC104574.1-201	-0.0282	0.0213	0.0495	1.0349	0.009	0.0181
LINC02349-201	-0.003	0.0026	0.0056	1.0039	0.7579	0.7976
LINC00566-201	-0.009	0.0083	0.0173	1.0121	0.3362	0.4099
LINC01616-201	0.0041	0.0012	-0.0028	-1.002	0.9567	0.9647
AC112236.1-201	-0.0414	0.0336	0.0751	1.0534	0.0007	0.0019
LINC01963-201	0.182	-0.1432	-0.3252	-1.2528	7.77e-09	7.2474e-08
AC034111.1-201	0.0006	-0.002	-0.0026	-1.0018	0.9005	0.9177
AC141586.3-201	-0.0464	0.0343	0.0807	1.0575	0.0181	0.0331
LCMT1-AS2-201	-0.0632	0.0472	0.1104	1.0795	2.3003e-06	1.3108e-05
LINC02249-202	-0.0387	0.033	0.0717	1.051	0.0034	0.008
LINC00565-201	-0.0361	0.0312	0.0673	1.0478	0.0043	0.0096
LINC00622-201	0.2454	-0.1952	-0.4406	-1.3572	1.218e-10	1.4847e-09
VPS9D1-AS1-202	-0.1515	0.1211	0.2725	1.2079	4.3622e-14	7.7793e-13
LINC00838-201	-0.0067	0.0039	0.0105	1.0073	0.5973	0.6551
IL21R-AS1-201	-0.0535	0.0422	0.0957	1.0686	0.0002	0.0006
AC015818.2-201	-0.1463	0.1156	0.2619	1.1991	5.7789e-08	4.6337e-07
AC068870.1-201	-0.0089	0.0046	0.0135	1.0094	0.5648	0.6273
FBXL19-AS1-201	-0.0606	0.0427	0.1033	1.0742	9.6185e-05	0.0004
LINC02555-201	0.6356	-0.5225	-1.1581	-2.2316	2.5433e-29	1.6328e-27
AL138976.2-201	-0.0422	0.0334	0.0756	1.0538	0.036	0.06
SNHG9-202	0.0189	-0.0158	-0.0346	-1.0243	0.647	0.7009
AL118516.1-201	-0.2184	0.1804	0.3988	1.3184	2.1631e-05	0.0001
LINC01898-201	-0.0204	0.0153	0.0357	1.0251	0.134	0.1873
AL035425.3-201	-0.4349	0.3572	0.792	1.7315	0.0001	0.0004
AC010336.2-201	-0.0146	0.0096	0.0242	1.0169	0.3507	0.4227
AL158212.3-201	0.1281	-0.1012	-0.2294	-1.1723	5.1171e-10	5.4151e-09
LINC00261-202	0.9678	-0.7792	-1.747	-3.3566	2.499e-26	1.3369e-24
AC036108.3-201	-0.0062	0.0018	0.008	1.0056	0.6577	0.71
UBL7-AS1-203	-0.1832	0.1536	0.3368	1.263	1.3163e-06	8.0739e-06
LINC01003-201	0.0967	-0.0653	-0.162	-1.1188	0.1034	0.1513
LINC01917-201	-0.0124	0.0096	0.022	1.0154	0.1947	0.258
AC009414.2-201	0.1344	-0.1102	-0.2446	-1.1847	0.0002	0.0008
AL049796.1-201	0.012	-0.008	-0.0201	-1.014	0.217	0.2831
AF096876.1-201	-0.0312	0.0216	0.0529	1.0373	0.0274	0.048
AC022167.2-201	-0.2507	0.201	0.4517	1.3676	1.4764e-17	3.6456e-16
AC136285.1-201	-0.0562	0.0435	0.0997	1.0716	2.1083e-05	9.8557e-05
LINC01477-201	-0.0253	0.0175	0.0428	1.0301	0.1371	0.1909
AL441883.1-201	-0.0589	0.0471	0.1061	1.0763	0.0006	0.0017
AL353746.1-201	-0.0408	0.0334	0.0742	1.0527	0.0002	0.0007
LINC01686-201	-0.0603	0.045	0.1053	1.0758	0.0003	0.001
LINC00563-201	-0.0599	0.0482	0.1081	1.0778	2.0151e-05	9.4658e-05
AP001527.1-201	-0.0061	0.0076	0.0137	1.0096	0.4672	0.5343
AC007066.2-202	-0.0124	0.0142	0.0266	1.0186	0.3896	0.4595
AC092447.8-201	-0.0231	0.0153	0.0384	1.027	0.0194	0.0351
LINC02140-202	-0.0272	0.019	0.0462	1.0326	0.069	0.1077
JHDM1D-AS1-201	-0.1297	0.1114	0.2411	1.1819	0.001	0.0026
LINC01834-201	-0.0507	0.0391	0.0898	1.0642	0.0002	0.0006
DKFZP434H168-201	-0.0387	0.0251	0.0638	1.0452	0.0082	0.0168
AL050341.2-201	0.0252	-0.004	-0.0292	-1.0204	0.7534	0.7938
AP000223.1-201	0.0787	-0.0611	-0.1398	-1.1018	1.2571e-09	1.2879e-08
HEXA-AS1-201	-0.0118	0.0074	0.0193	1.0134	0.2482	0.3187
AC138627.1-208	-0.0047	0.0029	0.0076	1.0053	0.6513	0.704
AC023043.1-201	-0.1042	0.0843	0.1885	1.1396	0.0032	0.0074
AC006058.1-201	0.1343	-0.1038	-0.2382	-1.1795	6.9238e-12	1.0102e-10
AC009812.4-201	0.0062	0.0062	-0.0001	-1.0001	0.9993	0.9993
LINC01566-202	-0.0849	0.0651	0.15	1.1096	4.0536e-06	2.193e-05
VENTXP1-201	-0.0148	0.012	0.0268	1.0187	0.0541	0.0859
AL807752.5-201	-0.0121	0.0093	0.0214	1.0149	0.477	0.5436
AC023830.1-201	-0.0309	0.0224	0.0533	1.0377	0.0299	0.0519
AC139256.1-201	0.0562	-0.0427	-0.0989	-1.071	0.0025	0.0062
AC007823.1-201	-0.0389	0.0318	0.0707	1.0502	0.0088	0.0179
LINC02192-201	-0.0322	0.0256	0.0579	1.0409	0.0056	0.0121
LINC02175-201	-0.0377	0.0313	0.069	1.049	0.0404	0.0663
AC087388.1-201	-0.3895	0.3294	0.7189	1.6459	1.2774e-20	4.1006e-19
AC087500.1-202	-0.0394	0.0334	0.0728	1.0518	0.0044	0.0098
AC015909.3-201	-0.0022	-0.0012	0.001	1.0007	0.9689	0.9755
DLGAP1-AS2-201	-0.0475	0.0385	0.086	1.0614	0.0852	0.1286
LINC01569-202	-0.1617	0.1313	0.293	1.2252	4.5652e-15	9.3538e-14
AC040160.1-201	-0.0768	0.0606	0.1374	1.0999	2.8304e-08	2.3701e-07
AC024361.2-201	-0.0336	0.022	0.0556	1.0393	0.0383	0.0637
AC139530.1-201	-0.0393	0.0362	0.0755	1.0537	0.0119	0.023
LINC02091-201	-0.016	0.0059	0.022	1.0153	0.4436	0.5116
AC127496.1-201	-0.054	0.0453	0.0993	1.0712	0.0001	0.0004
AC007638.1-201	-0.0432	0.033	0.0761	1.0542	0.0003	0.001
AC015813.1-202	-0.0087	0.0127	0.0214	1.015	0.7904	0.8229
AC005725.1-201	-0.0461	0.0399	0.086	1.0614	0.0011	0.0029
DLGAP1-AS3-201	-0.0356	0.0281	0.0637	1.0452	0.0042	0.0094
LINC02076-201	-0.1463	0.1156	0.2619	1.1991	5.7789e-08	4.6337e-07
AP002478.1-201	-0.1236	0.1023	0.2258	1.1695	1.7513e-05	8.5175e-05
WWC2-AS2-201	-0.0249	0.016	0.041	1.0288	0.1339	0.1873
L3MBTL4-AS1-201	-0.0393	0.0209	0.0602	1.0426	0.0864	0.13
PCAT18-201	-0.0496	0.0389	0.0885	1.0633	0.0129	0.0246
AA06-201	-0.0731	0.0595	0.1326	1.0963	3.4818e-06	1.9051e-05
LINC00909-202	0.2429	-0.1897	-0.4326	-1.3497	3.744e-07	2.5754e-06
AP005329.2-201	0.1642	-0.1315	-0.2957	-1.2275	2.5775e-06	1.4431e-05
LINC00526-201	-0.1783	0.152	0.3304	1.2573	6.4319e-06	3.4221e-05
AC018521.3-201	-0.0015	0.0001	0.0016	1.0011	0.9226	0.9382
MAFG-AS1-201	-0.2849	0.2322	0.5172	1.4311	1.0673e-32	7.9064e-31
AC012417.1-201	-0.0357	0.0295	0.0652	1.0462	0.0002	0.0005
CYP4F35P-201	-0.0678	0.0552	0.123	1.089	9.6387e-07	6.1066e-06
GATA6-AS1-202	0.4432	-0.3592	-0.8025	-1.7441	1.1264e-33	9.0397e-32
ESRG-201	-0.1903	0.153	0.3433	1.2687	0.0038	0.0087
AC015813.1-203	-0.0085	0.0077	0.0162	1.0113	0.7398	0.7812
AL354674.1-201	-0.0294	0.0241	0.0535	1.0378	0.0703	0.1093
ZNF667-AS1-201	0.1928	-0.1557	-0.3484	-1.2732	0.0004	0.0012
AC021517.1-202	-0.0261	0.0216	0.0477	1.0336	0.0045	0.01
AC016493.1-201	0.0252	-0.0177	-0.0429	-1.0302	0.0401	0.0659
AP001198.1-201	-0.0221	0.0149	0.037	1.026	0.0835	0.1265
AC011815.1-201	-0.1221	0.1018	0.2239	1.1679	3.4081e-11	4.4958e-10
AC010980.2-201	-0.6444	0.5293	1.1737	2.2558	1.7183e-18	4.5965e-17
AC006213.2-201	-0.0635	0.0468	0.1103	1.0795	0.1042	0.1518
LINC01864-201	-0.0059	0.0043	0.0102	1.0071	0.6038	0.6593
AC006116.8-202	-0.0318	0.0255	0.0573	1.0405	0.0026	0.0063
AC020916.1-201	0.1516	-0.1262	-0.2778	-1.2124	3.3611e-08	2.7903e-07
LINC01538-201	-0.0203	0.0172	0.0375	1.0263	0.0021	0.0051
LDLRAD4-AS1-201	-0.0272	0.023	0.0502	1.0354	0.0111	0.0216
AC139100.1-201	-0.0604	0.044	0.1045	1.0751	2.0766e-06	1.212e-05
TNRC6C-AS1-201	0.0087	-0.0123	-0.021	-1.0147	0.4109	0.4791
LINC01924-201	-0.0069	0.0057	0.0126	1.0088	0.6113	0.6667
LINC00906-206	-0.028	0.0223	0.0502	1.0354	0.0218	0.0388
AC005394.1-201	-0.0364	0.0327	0.0691	1.0491	0.0028	0.0067
AC010680.1-201	0.0091	-0.0064	-0.0155	-1.0108	0.2039	0.2686
RNF157-AS1-204	-0.0807	0.0705	0.1512	1.1105	0.014	0.0267
KCNJ2-AS1-201	-0.0042	0.0052	0.0094	1.0066	0.5998	0.6571
AC006557.1-201	-0.0216	0.0139	0.0356	1.025	0.0564	0.089
AC091152.2-201	0.0061	-0.0027	-0.0088	-1.0061	0.5892	0.6477
AC010327.3-201	-0.1047	0.0855	0.1902	1.1409	1.0214e-07	7.6845e-07
AC004917.1-204	-0.0589	0.0502	0.1091	1.0786	3.0452e-05	0.0001
AC021683.3-202	-0.05	0.04	0.09	1.0644	0.01	0.0198
FAM95B1-212	-0.0588	0.0466	0.1054	1.0758	0.0012	0.0031
AC123912.2-201	-0.0243	0.0215	0.0458	1.0322	0.0718	0.111
LINC01838-201	-0.077	0.0572	0.1342	1.0975	1.4391e-05	7.1147e-05
AC005498.3-201	-0.0034	0.0017	0.0051	1.0035	0.8795	0.9029
AC026304.1-201	-0.2841	0.234	0.5181	1.4321	1.2062e-13	2.0379e-12
AC006262.1-203	-0.0868	0.0724	0.1592	1.1167	3.9192e-10	4.4402e-09
AL031282.2-201	0.0727	-0.0603	-0.133	-1.0965	0.0037	0.0085
LINC00664-203	0.0006	0.0003	-0.0004	-1.0003	0.9873	0.9893
LINC02135-201	-0.02	0.0159	0.0358	1.0251	0.0817	0.1239
MZF1-AS1-202	-0.0102	0.0091	0.0194	1.0135	0.2867	0.3614
AC010300.1-201	0.0081	-0.0084	-0.0165	-1.0115	0.4052	0.4737
CARD8-AS1-201	0.4909	-0.4064	-0.8973	-1.8626	4.0319e-26	2.0436e-24
MKNK1-AS1-201	-0.0949	0.0746	0.1695	1.1247	3.8312e-07	2.606e-06
AL513318.2-201	-0.4546	0.3691	0.8236	1.7699	1.5597e-13	2.5896e-12
MAP2K4P1-202	0.1581	-0.127	-0.2851	-1.2185	7.8269e-09	7.2474e-08
AL158152.1-201	0.3837	-0.3035	-0.6873	-1.6102	5.8584e-19	1.7096e-17
AC146944.4-201	0.635	-0.5093	-1.1444	-2.2105	3.1962e-30	2.1985e-28
AL356488.2-201	-0.0281	0.0231	0.0512	1.0361	0.4791	0.5447
AC078795.2-201	0.0658	-0.0508	-0.1166	-1.0841	2.0687e-06	1.212e-05
CARMN-210	0.157	-0.1195	-0.2765	-1.2112	1.751e-06	1.0473e-05
AC087203.3-201	0.0457	-0.0348	-0.0805	-1.0574	0.1278	0.1799

## Sheet: Agilent Dataset T-Test
Agilent Dataset Two Sample T-Test Results
variable	Normal	Tumor	tissue type => Tumor vs Normal.Estimate	tissue type => Tumor vs Normal.FoldChange	tissue type => Tumor vs Normal.RawPValue	tissue type => Tumor vs Normal.FDR_BH
TTTY1-201	0.0746	0.2238	0.1492	1.109	0.4489	0.7145
TTTY11-201	-0.5925	-0.17	0.4225	1.3403	0.0862	0.3005
D21S2088E-201	0.0998	0.1571	0.0574	1.0406	0.7064	0.883
LINC01931-201	-0.2462	-0.3234	-0.0772	-1.055	0.7387	0.9045
LINC00208-201	-0.7619	-0.1866	0.5753	1.4899	0.0379	0.1973
MIR31HG-201	-0.3563	0.3545	0.7109	1.6368	0.0568	0.2431
CSPG4P2Y-201	0.2194	-0.0179	-0.2373	-1.1788	0.182	0.4449
LINC00471-201	-0.7117	-0.2694	0.4423	1.3588	0.0351	0.188
FO393415.1-201	1.3709	0.0967	-1.2742	-2.4187	0.0012	0.02
C9orf106-201	0.9671	0.3746	-0.5925	-1.5079	0.0785	0.2841
LINC02363-201	-1.9706	-1.133	0.8376	1.7871	0.0185	0.126
AL049647.1-201	-0.7557	-0.4337	0.322	1.25	0.1532	0.4064
AL161668.1-201	1.4765	0.1189	-1.3577	-2.5627	0.0079	0.0765
LINC01658-201	-0.577	-0.5839	-0.0069	-1.0048	0.9627	0.982
LINC00304-201	0.2651	0.123	-0.1421	-1.1035	0.5271	0.7744
HECW1-IT1-201	-1.1163	0.7173	1.8336	3.5643	5.3064e-06	0.0005
LINC00305-201	0.1041	0.0393	-0.0648	-1.046	0.1561	0.4106
TTTY14-201	-0.1556	-0.5156	-0.36	-1.2834	0.6018	0.8314
LINC00314-201	-1.3766	-1.2427	0.1338	1.0972	0.6936	0.872
LINC00334-201	0.2108	-0.3474	-0.5581	-1.4724	0.2018	0.4763
TTTY13-201	-0.5028	-0.0609	0.4419	1.3584	0.0406	0.2049
LINC01116-202	0.2875	0.8309	0.5435	1.4575	0.2078	0.4787
GATA3-AS1-201	0.6019	-0.1673	-0.7692	-1.7044	0.0169	0.1204
NBPF5P-201	0.2717	0.1642	-0.1076	-1.0774	0.7014	0.8795
AL162431.2-201	0.1123	0.0813	-0.031	-1.0217	0.8806	0.9532
C20orf204-201	-0.3885	-0.5155	-0.127	-1.092	0.511	0.7606
AFDN-DT-201	-0.8871	-0.4921	0.395	1.3149	0.3047	0.5893
AC004893.2-201	-0.3994	-0.6112	-0.2118	-1.1581	0.4528	0.7172
CROCCP2-201	-0.558	-0.3701	0.1879	1.1391	0.1805	0.4434
AC015969.1-201	0.22	0.3445	0.1244	1.0901	0.3599	0.6442
AC105053.1-201	0.5373	-0.7277	-1.2649	-2.4031	4.5101e-05	0.002
LINC00311-201	0.2886	0.3532	0.0645	1.0458	0.754	0.9134
AL645568.1-201	-0.4834	-0.3314	0.152	1.1111	0.3306	0.6148
SPATA42-201	-0.3767	-0.1922	0.1846	1.1365	0.3563	0.6413
LINC00619-201	0.1323	-0.0006	-0.1329	-1.0965	0.0531	0.2359
LINC01854-201	0.5543	-0.0343	-0.5886	-1.5038	0.0617	0.2552
MAMDC2-AS1-201	0.4134	-0.9583	-1.3717	-2.5878	0.0002	0.0053
AL391987.4-201	-0.2179	0.3308	0.5487	1.4628	0.1189	0.3534
AC007389.1-202	0.4304	0.1312	-0.2992	-1.2305	0.2878	0.5645
FAM239A-201	-0.1609	-0.0336	0.1272	1.0922	0.8899	0.9542
FAM99A-201	-0.8302	-0.6934	0.1368	1.0994	0.7386	0.9045
C1RL-AS1-201	-0.2726	-0.1315	0.1411	1.1028	0.2896	0.5657
WT1-AS-201	0.772	0.52	-0.2519	-1.1908	0.4977	0.7522
LINC02026-201	0.1818	0.2717	0.0899	1.0643	0.4578	0.7192
TTTY5-201	-0.9468	-1.2807	-0.3339	-1.2604	0.3714	0.6543
LINC01139-201	0.003	0.5747	0.5716	1.4862	0.0766	0.2836
MIR4435-2HG-203	0.3044	0.6135	0.3091	1.2389	0.1619	0.4188
AL031587.1-201	-0.2146	-0.3412	-0.1266	-1.0917	0.2478	0.5176
TTLL11-IT1-201	0.0302	0.2691	0.2389	1.1801	0.0932	0.3042
AL121899.1-202	0.0808	-0.1979	-0.2786	-1.2131	0.1622	0.4188
HSPC324-201	2.102	0.1978	-1.9042	-3.7429	2.2154e-05	0.0014
IL10RB-AS1-201	0.4816	0.7709	0.2894	1.2221	0.1312	0.3673
LINC00354-201	-0.7358	-0.3782	0.3576	1.2813	0.0342	0.1852
LINC00092-201	0.5131	-0.3619	-0.875	-1.834	0.0013	0.0204
AC235097.1-201	0.1193	0.1979	0.0786	1.056	0.0679	0.268
AL122058.1-201	-0.0823	-0.0407	0.0417	1.0293	0.857	0.9465
AL136531.1-201	-0.3865	-0.3188	0.0677	1.0481	0.728	0.8977
LINC00606-201	0.0452	-0.0294	-0.0746	-1.053	0.817	0.9344
LINC01734-201	0.3745	0.0231	-0.3514	-1.2758	0.159	0.416
LINC01191-201	0.0342	0.1725	0.1383	1.1006	0.6737	0.8629
LINC00427-201	-0.2536	-0.1637	0.0898	1.0642	0.6691	0.8629
LINC00525-201	-1.0232	-0.4878	0.5354	1.4493	0.0076	0.0737
LINC01312-201	-0.3835	-0.0238	0.3597	1.2832	0.087	0.3005
CCDC148-AS1-201	-0.3249	-0.2492	0.0758	1.0539	0.572	0.81
LINC00894-201	-0.1403	0.2032	0.3435	1.2689	0.378	0.6571
AL139039.3-201	0.068	0.0707	0.0026	1.0018	0.9269	0.9704
AC104823.1-201	-0.3159	-0.2547	0.0612	1.0433	0.6599	0.8606
LINC01720-201	-0.0386	0.1281	0.1667	1.1225	0.0994	0.3167
AC000099.1-202	-0.2835	0.0946	0.3781	1.2997	0.0443	0.2165
AL031666.1-201	-0.7055	-0.119	0.5865	1.5016	0.0932	0.3042
AC131097.3-201	-0.4581	-0.6505	-0.1924	-1.1426	0.2799	0.5557
LINC00421-201	-0.284	-0.2986	-0.0146	-1.0101	0.9432	0.9733
HCP5-201	0.1682	0.0984	-0.0698	-1.0495	0.7753	0.9237
AC002480.4-201	0.0379	-0.1258	-0.1637	-1.1201	0.0996	0.3167
LINC00887-202	-0.2867	0.4563	0.743	1.6736	0.0279	0.1624
LINC00437-201	0.0762	0.0483	-0.0279	-1.0195	0.8596	0.9469
LINC00330-201	-0.2197	-0.3266	-0.1069	-1.0769	0.5058	0.7575
LINC01704-201	-0.327	-0.6814	-0.3545	-1.2785	0.0171	0.1204
EGOT-201	0.0006	0.4027	0.4021	1.3214	0.2896	0.5657
TPTEP1-203	0.3112	-0.0711	-0.3823	-1.3034	0.3123	0.598
VPS13A-AS1-201	-0.8949	-0.6536	0.2412	1.182	0.2225	0.4936
LINC01128-201	0.1548	0.2245	0.0697	1.0495	0.8223	0.9353
PIK3CD-AS2-201	-0.701	1.1554	1.8564	3.621	0.0011	0.0189
AC007349.3-201	-0.2971	-0.5047	-0.2077	-1.1548	0.2304	0.4987
ELFN1-AS1-201	-0.3776	-0.0841	0.2935	1.2256	0.059	0.2494
LINC01614-201	-0.0711	2.6411	2.7122	6.5531	1.9588e-06	0.0003
AC108058.1-202	-1.7374	-1.7205	0.0169	1.0118	0.9539	0.9782
KIAA1614-AS1-201	-0.1865	0.1317	0.3182	1.2468	0.0293	0.1671
LINC01656-201	-0.4878	-0.4866	0.0012	1.0008	0.9944	0.9957
AP006285.2-201	-0.3869	-0.4573	-0.0704	-1.05	0.6624	0.8606
AL139352.1-201	-0.0819	0.2864	0.3683	1.2908	0.1336	0.3719
AC092155.1-202	0.2132	0.183	-0.0301	-1.0211	0.8543	0.9461
LINC01689-201	0.1146	0.4298	0.3152	1.2442	0.2463	0.5176
LINC00630-201	0.0902	0.1314	0.0412	1.029	0.884	0.9542
ZNF503-AS1-201	-0.034	-0.257	-0.2229	-1.1671	0.4691	0.7321
AL691426.1-201	-0.8557	-0.4615	0.3942	1.3142	0.1141	0.3436
DAB1-AS1-201	-0.2988	-0.3593	-0.0605	-1.0428	0.8398	0.9411
CLDN10-AS1-201	0.0613	1.4989	1.4376	2.7087	0.0306	0.1731
MIATNB-201	-0.2337	-0.2289	0.0048	1.0034	0.9764	0.9894
LINP1-201	0.0645	0.2182	0.1537	1.1124	0.6092	0.8345
AC092535.1-201	-0.2749	0.6062	0.8812	1.8419	0.0204	0.1353
AC011752.1-203	0.046	-0.4026	-0.4486	-1.3648	0.0695	0.272
CHL1-AS1-201	-0.9156	-0.1998	0.7158	1.6424	0.0865	0.3005
LINC01756-201	-0.3101	-0.559	-0.2489	-1.1883	0.1056	0.3294
LINC02579-201	-0.432	-0.2451	0.187	1.1384	0.3904	0.669
AL645608.1-202	-0.1377	-0.7035	-0.5658	-1.4802	0.0255	0.1525
AL160408.1-201	-0.1162	0.5031	0.6193	1.5362	0.0729	0.2755
LINC01424-201	0.0236	0.1598	0.1362	1.099	0.6764	0.8651
LINC00705-201	-0.043	-0.0859	-0.043	-1.0302	0.6455	0.8573
AC080129.2-201	-0.2884	-0.6041	-0.3156	-1.2446	0.103	0.3252
AL391704.2-201	-0.1917	-0.0538	0.1379	1.1003	0.5761	0.8109
AL391832.2-201	-0.3811	-0.285	0.0962	1.0689	0.723	0.8942
LINC01219-201	-0.6487	-0.5833	0.0654	1.0464	0.7719	0.9234
PACRG-AS2-201	0.0373	0.1374	0.1001	1.0719	0.4447	0.7124
AL450469.1-201	0.2075	0.2625	0.055	1.0389	0.2298	0.4984
AC093690.1-201	-0.7149	-0.5203	0.1946	1.1444	0.4339	0.7058
AC106869.1-203	0.1074	-0.3037	-0.4111	-1.3297	0.1633	0.4205
LINC00317-201	-0.1959	-0.1934	0.0024	1.0017	0.9895	0.9946
LINC02097-201	-0.0377	-0.0552	-0.0175	-1.0122	0.9538	0.9782
LINC00410-201	-0.062	0.1667	0.2287	1.1718	0.1911	0.4602
FLJ37035-201	0.2004	0.3155	0.1151	1.0831	0.691	0.8709
LINC00308-201	-0.0358	0.1034	0.1392	1.1013	0.5774	0.8109
LINC01788-201	-0.0166	0.1223	0.1389	1.1011	0.3936	0.6733
AC019117.2-201	-0.3859	0.0431	0.4291	1.3463	0.177	0.44
LINC01687-202	-2.2799	-1.6977	0.5823	1.4972	0.2199	0.4914
LINC01494-201	-0.3072	-0.546	-0.2388	-1.18	0.3576	0.6425
LINC01527-201	-0.6744	-0.0523	0.6222	1.5392	0.0438	0.2165
AL445430.1-201	0.1667	0.2479	0.0812	1.0579	0.5747	0.8109
AL109924.2-201	0.0756	0.2202	0.1446	1.1054	0.5696	0.8097
AL162391.1-201	-0.176	-0.0897	0.0863	1.0617	0.1863	0.4531
AP002884.3-203	0.0897	-0.03	-0.1197	-1.0865	0.7191	0.8936
TP73-AS1-202	0.9886	0.6655	-0.3232	-1.2511	0.3005	0.5834
AL021937.1-201	-0.4724	-0.5513	-0.0789	-1.0562	0.7603	0.9176
AP001605.1-201	-0.1813	0.0232	0.2045	1.1523	0.1272	0.3645
SH3BP5-AS1-202	0.6568	0.1326	-0.5242	-1.4381	0.1105	0.3377
AL360093.1-201	-0.524	0.539	1.063	2.0892	0.0029	0.0381
AC092809.4-201	-0.3775	0.1544	0.5318	1.4458	0.0138	0.1096
AL139125.1-201	-0.0065	-0.0345	-0.028	-1.0196	0.8547	0.9461
NUTM2A-AS1-205	0.1045	-0.0181	-0.1227	-1.0888	0.6713	0.8629
LINC00574-201	-1.0873	-0.5463	0.541	1.4549	0.007	0.0706
AC104653.1-201	0.102	0.0383	-0.0637	-1.0451	0.754	0.9134
AC007389.3-201	-0.7541	-0.2244	0.5297	1.4436	0.0004	0.0091
AC074035.1-201	-0.0978	-0.2327	-0.1349	-1.098	0.6732	0.8629
ENTPD3-AS1-201	0.1228	-0.0786	-0.2014	-1.1498	0.4424	0.7101
LINC01305-201	-0.9063	-0.6122	0.2941	1.2261	0.2043	0.4787
MRGPRG-AS1-201	0.1628	-0.1054	-0.2682	-1.2043	0.2467	0.5176
LINC01426-202	0.1999	0.1886	-0.0112	-1.0078	0.96	0.9804
AC004947.1-201	0.9847	-0.2187	-1.2034	-2.3028	0.0021	0.0302
AP000289.1-201	-0.722	-0.7747	-0.0528	-1.0373	0.8371	0.9406
AL357055.3-201	-0.9336	-0.9901	-0.0565	-1.04	0.8698	0.9489
NEXN-AS1-201	0.1255	-0.2005	-0.326	-1.2536	0.1206	0.3564
LINC00271-201	0.2189	-0.18	-0.3989	-1.3185	0.0635	0.2589
SOX1-OT-201	-0.519	-0.3357	0.1833	1.1355	0.322	0.6117
BSN-AS2-201	-0.3542	-0.3049	0.0493	1.0348	0.795	0.9314
LINC00174-204	-0.3812	0.6445	1.0257	2.036	0.0005	0.0106
AC007557.4-201	-0.165	-0.4217	-0.2567	-1.1948	0.2715	0.5425
LINC01936-201	2.06	0.3747	-1.6853	-3.2161	0.0008	0.0147
AL023755.1-203	-1.1619	-0.4355	0.7264	1.6545	0.0032	0.0402
AC010145.1-201	0.1145	0.3887	0.2742	1.2093	0.0671	0.2668
AC005064.1-201	0.075	0.3571	0.2821	1.216	0.0956	0.3079
AL391095.1-201	-0.152	-0.4507	-0.2987	-1.23	0.2316	0.4995
LINC01074-201	-0.2648	-0.3342	-0.0693	-1.0492	0.8092	0.9335
AC016747.1-203	0.4508	0.5551	0.1043	1.075	0.6549	0.8606
LINC00857-201	-0.4039	-0.0523	0.3515	1.2759	0.257	0.5256
MAP3K20-AS1-203	-0.6902	-0.2198	0.4704	1.3855	0.0863	0.3005
AC004906.1-201	-0.0719	0.2686	0.3405	1.2662	0.0183	0.1256
LINC00284-201	0.7626	0.001	-0.7616	-1.6953	0.0239	0.1478
AL162425.1-201	-1.2477	-1.3864	-0.1388	-1.101	0.7574	0.9163
AL355674.1-201	-0.3021	-1.1932	-0.8911	-1.8546	0.0143	0.1096
AC062015.1-201	-0.4109	0.4951	0.9059	1.8737	0.0004	0.0091
AC156455.1-203	-0.6283	-0.2524	0.3759	1.2976	0.2556	0.5248
AL139246.3-201	-0.8777	-0.9874	-0.1097	-1.079	0.6729	0.8629
AL603840.1-203	0.0175	0.0602	0.0428	1.0301	0.8124	0.9335
SLIT1-AS1-201	0.114	0.1696	0.0556	1.0393	0.3309	0.6148
IL6R-AS1-201	-0.219	0.0118	0.2308	1.1735	0.3526	0.6395
AC007128.1-201	-0.4667	0.6304	1.0971	2.1393	0.0071	0.0712
AC024560.1-201	-0.8468	0.1534	1.0003	2.0004	0.0506	0.2328
AC016909.2-201	0.3984	-0.2182	-0.6166	-1.5333	0.0205	0.1353
AL353148.1-202	-0.4138	-0.335	0.0788	1.0561	0.8225	0.9353
LINC01315-202	0.046	0.0061	-0.0399	-1.028	0.8991	0.9557
AP001626.1-201	0.2299	0.431	0.2011	1.1496	0.4382	0.7092
LINC01137-201	-0.2235	0.4854	0.7089	1.6346	0.0024	0.0333
PITPNA-AS1-201	-0.2331	0.2457	0.4788	1.3936	0.0235	0.1478
AL445433.2-201	-0.0168	0.0233	0.0401	1.0282	0.8507	0.9461
AC099684.1-202	0.0041	-0.6295	-0.6336	-1.5514	0.0003	0.0084
LINC00462-201	-0.5186	-0.1094	0.4092	1.3279	0.042	0.2098
LINC01523-201	-0.6314	-0.0321	0.5993	1.5149	0.0072	0.0712
AL360295.1-201	1.0447	0.1893	-0.8554	-1.8093	0.0193	0.1307
LINC00454-201	-0.744	-0.732	0.012	1.0084	0.9563	0.9789
BX088651.2-201	0.5531	0.0692	-0.4838	-1.3985	0.309	0.5928
AC103702.2-203	-0.7821	-0.527	0.2551	1.1934	0.0816	0.2892
AL450384.2-201	-0.6327	-0.6066	0.0261	1.0183	0.9429	0.9733
AC008268.1-201	3.5273	1.5704	-1.9569	-3.8821	0.0056	0.0596
AC022034.2-201	1.2175	0.6302	-0.5873	-1.5024	0.2167	0.4898
AL021392.1-201	-0.4181	-0.3005	0.1175	1.0849	0.473	0.7322
RNF144A-AS1-203	-0.2459	0.428	0.6739	1.5954	0.0088	0.082
MIR4290HG-201	0.1728	0.1837	0.0109	1.0076	0.8925	0.9542
PRKG1-AS1-202	0.0712	-0.2758	-0.3469	-1.2719	0.0735	0.2765
LINC01049-201	-0.6518	-0.472	0.1798	1.1327	0.2551	0.5248
AL136309.2-201	-0.5409	-0.8406	-0.2997	-1.2309	0.2185	0.491
AL161636.1-201	0.1641	0.3978	0.2337	1.1758	0.0516	0.2333
LINC01741-201	-0.3871	-0.4673	-0.0802	-1.0572	0.6634	0.8606
AL606534.4-201	-0.1647	0.1229	0.2876	1.2206	0.4646	0.7263
LINC00313-205	1.3357	0.0147	-1.3211	-2.4985	0.0106	0.0909
LINC01874-201	0.3313	0.3193	-0.012	-1.0083	0.9477	0.975
LINC01222-201	0.1444	0.1476	0.0031	1.0022	0.989	0.9946
TAF1A-AS1-202	-0.5672	-0.1111	0.456	1.3718	0.0006	0.0123
MED15P9-202	0.7323	1.1115	0.3792	1.3006	0.4609	0.7229
LIMD1-AS1-201	1.0724	0.0899	-0.9825	-1.976	3.5303e-05	0.0018
AC099786.2-201	-0.339	-0.1119	0.2271	1.1705	0.2593	0.5262
AP001630.1-201	-0.7476	-0.4633	0.2843	1.2178	0.0441	0.2165
FRY-AS1-201	-0.2984	0.231	0.5295	1.4434	0.114	0.3436
DNAJC27-AS1-204	0.2101	0.151	-0.0591	-1.0418	0.7366	0.9045
HMGA1P4-201	-0.4884	0.7319	1.2203	2.3299	3.1192e-05	0.0018
DEPDC1-AS1-201	0.1208	0.1757	0.0549	1.0388	0.6904	0.8709
LINC00348-201	-0.1079	0.5218	0.6296	1.5472	0.0775	0.2837
AL596442.1-201	-0.1495	-0.1083	0.0412	1.029	0.6325	0.8484
MEG9-201	0.1055	-0.1375	-0.2429	-1.1834	0.1553	0.4099
AL078601.2-201	-0.0568	0.4022	0.4589	1.3745	0.1176	0.3516
LINC01238-203	-0.7291	-0.3409	0.3882	1.3088	0.0769	0.2836
AL138775.1-201	0.1643	0.186	0.0216	1.0151	0.5635	0.8075
LINC01153-201	-0.5221	-0.3638	0.1583	1.116	0.4732	0.7322
LINC00690-201	-0.1746	-0.1705	0.0042	1.0029	0.9837	0.993
LINC01425-202	-0.065	0.0445	0.1095	1.0789	0.6593	0.8606
LINC01770-202	-0.3698	0.1799	0.5497	1.4638	0.0002	0.0064
LINC01149-202	0.2349	0.1465	-0.0884	-1.0632	0.7235	0.8942
FAM212B-AS1-201	0.7904	0.2593	-0.5311	-1.445	0.0384	0.1979
AC096677.2-201	2.1938	1.2849	-0.9089	-1.8776	0.0339	0.1843
LBX1-AS1-201	-0.2961	-0.5833	-0.2872	-1.2202	0.1223	0.3591
DLG1-AS1-202	-0.4728	0.3732	0.846	1.7975	0.0013	0.0204
LINC00309-201	0.0355	0.0542	0.0187	1.0131	0.8052	0.9322
AL445235.1-201	0.262	0.2008	-0.0612	-1.0434	0.1958	0.468
LINC01352-201	-0.6669	-0.6565	0.0105	1.0073	0.9571	0.9789
AL137220.1-201	0.1976	0.6063	0.4086	1.3274	0.2074	0.4787
LINC01010-201	0.313	0.6249	0.3119	1.2414	0.3237	0.6117
LINC00210-201	0.2755	-0.1754	-0.4509	-1.3669	0.0752	0.2809
LINC01282-201	-0.6722	-0.5462	0.126	1.0912	0.6143	0.8379
AL513323.1-201	-0.0142	0.1663	0.1804	1.1332	0.4846	0.7385
AL357558.2-201	-0.1444	-0.1542	-0.0099	-1.0069	0.9687	0.9853
HDHD5-AS1-202	-0.2227	0.0577	0.2805	1.2146	0.324	0.6117
AL138733.2-201	-0.4333	-0.517	-0.0837	-1.0597	0.6435	0.8559
LINC01087-201	-0.2467	0.2223	0.469	1.3842	0.4053	0.6801
AL133410.1-202	-0.6265	-0.3425	0.284	1.2176	0.3546	0.641
LINC01598-201	-0.3619	0.3794	0.7413	1.6717	0.0622	0.2559
DSCR10-201	0.0365	-0.0655	-0.102	-1.0733	0.4732	0.7322
LINC01981-201	-0.1961	0.559	0.7551	1.6878	0.0101	0.0892
AL109741.1-201	1.5283	-0.5097	-2.038	-4.1067	2.1105e-06	0.0003
LINC01723-201	0.1234	0.2081	0.0848	1.0605	0.7815	0.927
AL022332.1-202	0.2884	0.6114	0.323	1.2509	0.1783	0.4403
LINC00691-201	-0.0897	0.1047	0.1944	1.1442	0.2496	0.5176
TNFRSF14-AS1-202	-1.0774	-1.054	0.0234	1.0164	0.9252	0.9704
DPP10-AS1-201	-0.4493	0.2642	0.7136	1.6398	0.0455	0.2178
LINC01844-201	0.0763	0.2064	0.13	1.0943	0.6079	0.8341
LINC00608-202	-0.5092	-0.6269	-0.1177	-1.085	0.4738	0.7322
PLCE1-AS2-202	-0.0681	-0.1469	-0.0788	-1.0562	0.6625	0.8606
SMG7-AS1-202	-0.0072	0.4691	0.4762	1.3911	0.0307	0.1731
FAM41C-202	-0.1152	0.3531	0.4683	1.3835	0.0257	0.1525
AC005281.1-201	-0.5666	-0.3115	0.2551	1.1934	0.2449	0.5176
LINC01797-202	0.5158	-0.1004	-0.6163	-1.5329	0.0327	0.18
LINC00441-201	0.2693	0.1262	-0.1431	-1.1043	0.4729	0.7322
AC069277.1-201	-0.099	0.081	0.18	1.1329	0.3792	0.6571
AC006372.2-201	-0.5237	-0.3342	0.1895	1.1404	0.3523	0.6395
LINC00954-201	-0.9279	-0.2934	0.6345	1.5524	0.0484	0.2273
MYCNUT-201	0.0459	-0.1084	-0.1543	-1.1129	0.554	0.7991
AC020571.1-202	0.9886	0.631	-0.3576	-1.2813	0.158	0.4145
LINC01700-201	0.0473	0.15	0.1027	1.0738	0.2015	0.4763
LINC02580-201	0.7254	-0.8535	-1.579	-2.9876	8.636e-05	0.003
LINC00163-201	0.2421	-0.2772	-0.5192	-1.4332	0.0008	0.016
LINC01852-201	0.8855	0.1355	-0.75	-1.6818	0.0003	0.0086
STK4-AS1-201	0.191	0.1913	0.0003	1.0002	0.9984	0.9984
LINC01007-201	0.207	0.4004	0.1934	1.1434	0.1429	0.3867
STK24-AS1-201	0.1747	-0.3047	-0.4794	-1.3942	0.0921	0.3042
AL162231.2-201	1.0363	0.3718	-0.6645	-1.585	0.0759	0.2823
Z82186.1-201	0.1047	-0.886	-0.9907	-1.9872	1.2211e-05	0.0008
DNAJC27-AS1-205	0.9229	-0.0518	-0.9747	-1.9652	0.0008	0.0147
LINC01208-202	-0.7459	-0.2004	0.5454	1.4595	0.0673	0.2668
LINC00595-204	0.1227	0.1284	0.0058	1.004	0.7673	0.921
LINC00460-201	0.2011	0.2823	0.0811	1.0579	0.8226	0.9353
AC106875.1-202	-0.3361	-0.4709	-0.1349	-1.098	0.409	0.6826
MORF4L2-AS1-201	-0.2508	-0.3315	-0.0807	-1.0575	0.7776	0.9245
RAPGEF4-AS1-202	-0.7438	-0.3017	0.4421	1.3585	0.0886	0.3024
LINC00028-201	-0.8769	-1.4772	-0.6004	-1.5161	0.0283	0.1624
AC076966.1-201	-0.1548	-0.3353	-0.1805	-1.1333	0.2281	0.4984
LINC01354-202	1.5702	0.1219	-1.4483	-2.7288	0.0002	0.0064
MIR99AHG-205	-0.5645	-0.7369	-0.1724	-1.1269	0.2295	0.4984
AL359182.1-201	0.6416	0.8259	0.1843	1.1363	0.6104	0.835
AL357507.1-201	-0.056	-0.2874	-0.2315	-1.174	0.1644	0.421
C20orf166-AS1-202	-0.5422	-0.7089	-0.1667	-1.1225	0.2735	0.5453
LINC01366-201	0.3433	0.059	-0.2843	-1.2179	0.2461	0.5176
LINC02573-201	-0.4532	-0.7583	-0.3051	-1.2355	0.1321	0.3688
AC073133.2-201	-0.1433	-0.9625	-0.8193	-1.7645	0.0089	0.082
AC092809.2-202	-0.5017	-0.2439	0.2579	1.1957	0.1471	0.3945
AC011893.1-201	-0.055	0.1248	0.1798	1.1327	0.2161	0.4896
AL591368.1-201	-0.0925	-0.0221	0.0703	1.0499	0.6176	0.8396
AL157373.2-201	-0.406	-0.3216	0.0844	1.0603	0.6381	0.8511
AC011995.1-201	-0.4034	-0.596	-0.1926	-1.1428	0.1385	0.379
LINC00242-201	0.1426	0.1758	0.0332	1.0233	0.8115	0.9335
C10orf71-AS1-201	0.003	-0.1441	-0.1471	-1.1073	0.652	0.8606
SNHG3-202	-0.2425	-0.122	0.1205	1.0871	0.5471	0.7935
LINC01120-201	-0.0051	-0.2067	-0.2016	-1.15	0.3768	0.6571
CASC6-201	-0.2126	0.0365	0.2491	1.1884	0.2108	0.4811
AL162384.1-201	0.1927	0.1806	-0.0121	-1.0084	0.484	0.7385
DCTN1-AS1-206	-1.244	-0.7752	0.4688	1.3839	0.1069	0.3321
FGF13-AS1-201	0.99	0.1995	-0.7906	-1.7298	0.0045	0.051
LINC01297-201	-0.0371	0.5573	0.5945	1.5099	0.1362	0.3771
AL445072.1-201	-0.0544	0.5973	0.6517	1.571	0.0159	0.1171
AC011228.1-201	0.2605	0.174	-0.0865	-1.0618	0.722	0.8942
AC019117.1-202	1.0329	1.0057	-0.0272	-1.019	0.9576	0.9789
LINC01806-202	0.8053	1.0903	0.285	1.2184	0.3801	0.6571
AL590683.1-201	0.1682	0.0977	-0.0705	-1.0501	0.6835	0.8686
RNF217-AS1-201	-0.672	0.3552	1.0272	2.0381	0.0052	0.0576
LINC00415-201	0.0131	0.1208	0.1077	1.0775	0.4085	0.6826
AP006216.1-201	0.5135	-0.228	-0.7416	-1.672	0.0011	0.0189
AC074183.1-201	0.9172	0.4395	-0.4777	-1.3925	0.0109	0.0925
AC012494.1-201	-1.7088	-0.5136	1.1952	2.2897	0.0141	0.1096
AL118511.1-201	0.1464	0.2984	0.152	1.1111	0.5066	0.7575
C21orf91-OT1-203	0.3942	0.1076	-0.2866	-1.2198	0.0977	0.3137
C9orf135-AS1-201	-0.2623	-0.2298	0.0325	1.0228	0.8004	0.9322
AL121672.1-201	-0.6386	-0.0944	0.5442	1.4582	0.045	0.2178
MACROD2-AS1-201	-0.7941	-0.5832	0.2109	1.1574	0.1081	0.3347
LINC01134-202	-0.7185	-0.3487	0.3697	1.2921	0.0232	0.1467
AL035448.1-201	-0.4985	-0.4469	0.0516	1.0364	0.8204	0.9353
U73166.1-201	-0.4557	-0.4711	-0.0155	-1.0108	0.9314	0.9728
SPATA13-213	1.569	0.363	-1.206	-2.307	0.011	0.0925
AC105339.1-203	-0.256	-0.4535	-0.1975	-1.1467	0.402	0.6779
LINC02574-201	0.808	-0.1552	-0.9631	-1.9495	0.0074	0.0725
AP001432.1-201	-0.1795	-0.0897	0.0897	1.0642	0.3757	0.6571
AL162419.1-201	-0.3189	-0.1239	0.195	1.1447	0.3011	0.5835
KCNQ1-AS1-201	-0.2321	-0.9071	-0.675	-1.5966	0.0001	0.0036
LINC01692-201	-0.4677	-0.6674	-0.1998	-1.1485	0.3782	0.6571
AL391987.3-201	-0.5694	0.3626	0.932	1.908	0.0006	0.0121
OSTM1-AS1-202	0.3154	0.4145	0.0991	1.0711	0.6583	0.8606
LINC01271-201	-0.6348	-0.6616	-0.0268	-1.0187	0.8932	0.9542
SATB2-AS1-202	0.0119	0.02	0.008	1.0056	0.9425	0.9733
ZEB1-AS1-203	0.6599	0.6918	0.0318	1.0223	0.8913	0.9542
LINC01920-201	0.0393	0.2306	0.1913	1.1418	0.1303	0.3669
KCNQ1DN-201	-0.1826	-0.3364	-0.1539	-1.1125	0.4174	0.6918
AC097468.1-201	-0.0981	0.4171	0.5152	1.4292	0.0217	0.1403
AL353052.2-201	-0.6943	-0.4534	0.241	1.1818	0.2061	0.4787
ACVR2B-AS1-201	0.1858	-0.213	-0.3988	-1.3184	0.0055	0.0596
LINC01718-201	-0.5964	-0.3413	0.2552	1.1935	0.2219	0.4935
LINC02243-201	0.1955	-0.0083	-0.2038	-1.1518	0.2505	0.5176
AL023755.1-201	-0.3685	-0.0498	0.3187	1.2472	0.3592	0.6441
RPS10P7-201	-0.8677	0.2782	1.1459	2.2128	0.0001	0.0042
LINC00315-201	0.3845	-0.3327	-0.7171	-1.6439	0.0028	0.0369
AC004975.2-201	-0.587	0.2998	0.8868	1.849	0.0009	0.0162
LINC02264-201	-0.269	-0.1627	0.1063	1.0764	0.815	0.9342
LINC01525-201	-0.6752	-0.0356	0.6396	1.5579	0.0128	0.1035
MEG8-205	0.3119	-0.7619	-1.0738	-2.105	0.0143	0.1096
AC002480.1-201	-0.5253	-0.5399	-0.0146	-1.0102	0.9055	0.9597
RFTN1P1-201	-0.7767	-0.6657	0.111	1.08	0.5818	0.8119
ENO1-AS1-201	0.3231	0.1764	-0.1467	-1.1071	0.4984	0.7522
LINC01134-203	-0.4354	-0.3779	0.0575	1.0406	0.7942	0.9314
AL157414.2-201	-0.2704	-0.6419	-0.3716	-1.2937	0.0671	0.2668
LINC01679-201	0.1314	0.4114	0.28	1.2142	0.4953	0.7519
AC073911.1-202	-0.4625	-0.2961	0.1664	1.1223	0.524	0.7744
LINC00656-201	0.1883	0.0994	-0.0889	-1.0636	0.409	0.6826
AL442224.1-201	0.1219	0.3391	0.2172	1.1625	0.2283	0.4984
LINC00327-201	-0.4475	-0.9086	-0.4611	-1.3766	0.0046	0.0511
AC010096.1-201	-0.042	0.4742	0.5162	1.4302	0.0658	0.264
AL391056.1-201	-0.5459	-0.2508	0.2951	1.227	0.1379	0.3782
AC006372.3-201	-0.8302	-0.9023	-0.0721	-1.0512	0.7209	0.8942
LINC00302-201	-0.1342	-0.2589	-0.1246	-1.0902	0.5208	0.7728
AL109924.1-201	0.0472	-0.025	-0.0722	-1.0513	0.6562	0.8606
AC096541.1-201	-0.6247	-0.6083	0.0164	1.0114	0.9363	0.9733
Z94160.1-201	-0.4701	-0.4307	0.0395	1.0277	0.7845	0.927
LINC01165-201	0.4584	-0.4384	-0.8968	-1.862	0.0004	0.0096
AL583839.1-201	-0.2237	-0.3013	-0.0775	-1.0552	0.5543	0.7991
LINC01015-204	0.3233	0.2212	-0.1021	-1.0733	0.5615	0.8069
LINC02549-201	-2.3917	-1.8119	0.5798	1.4946	0.18	0.4434
FOXD2-AS1-201	-0.8675	0.2919	1.1594	2.2337	6.3399e-06	0.0006
SLC25A5-AS1-202	-0.4043	-0.1645	0.2397	1.1808	0.3435	0.6304
AC002064.1-201	0.8493	-0.1571	-1.0064	-2.0089	8.4386e-06	0.0006
LINC01800-201	-0.638	-0.1345	0.5035	1.4176	0.1367	0.3771
FLJ31356-202	-0.2009	-0.2749	-0.074	-1.0526	0.608	0.8341
AL139237.1-201	-0.7183	-0.4427	0.2757	1.2106	0.1467	0.3945
PARD3-AS1-201	0.1967	0.5846	0.3879	1.3085	0.2541	0.524
AF274858.2-201	0.1941	0.259	0.0649	1.046	0.5615	0.8069
SDCBP2-AS1-201	0.1526	0.0088	-0.1438	-1.1048	0.1237	0.36
ATP11A-AS1-201	0.6767	0.4539	-0.2228	-1.167	0.6246	0.8447
AC005772.1-201	-0.5877	-0.2724	0.3152	1.2442	0.0566	0.2431
AC011900.1-201	-0.2124	-0.0065	0.2059	1.1534	0.523	0.7744
LINC01186-201	0.1322	-0.907	-1.0392	-2.0551	0.0356	0.1886
LINC00323-203	0.9496	0.6665	-0.2831	-1.2168	0.4352	0.7068
LINC01107-201	-0.4377	-0.6251	-0.1874	-1.1387	0.2069	0.4787
APTR-205	-0.0377	0.3768	0.4145	1.3328	0.0781	0.2837
SNHG7-204	-0.3372	-0.2882	0.049	1.0346	0.839	0.9411
AC012361.1-201	0.1421	0.0979	-0.0441	-1.0311	0.6815	0.8681
AL139275.1-201	-0.737	-0.3316	0.4055	1.3245	0.0447	0.2176
LINC00513-201	-0.1705	-0.4323	-0.2618	-1.1989	0.4541	0.7172
AP001189.1-201	0.3056	-0.4417	-0.7473	-1.6786	0.0041	0.0465
AC078842.2-201	-0.519	-0.1979	0.3211	1.2493	0.2618	0.5262
AL121970.1-201	-0.7454	0.0341	0.7795	1.7165	0.0226	0.1438
LINC00408-201	-0.0646	-0.6587	-0.5941	-1.5095	0.219	0.491
KRBOX1-AS1-201	0.1442	0.175	0.0308	1.0216	0.8887	0.9542
AL133319.1-201	-0.311	-0.0562	0.2548	1.1932	0.3548	0.641
AL161646.1-201	0.2501	0.5131	0.263	1.2	0.3328	0.6152
LINC00582-201	-0.3556	0.4032	0.7588	1.6921	0.0033	0.0408
AL645608.3-201	-0.4457	-0.0056	0.4401	1.3567	0.0721	0.2753
LINC01809-201	-0.856	-1.1686	-0.3126	-1.2419	0.2289	0.4984
LINC01281-202	-0.3515	-0.0588	0.2927	1.225	0.2279	0.4984
AL050331.3-201	-0.4601	0.1318	0.5919	1.5073	0.0474	0.2248
AL139350.1-201	-0.1267	0.1152	0.2419	1.1826	0.1126	0.3428
AL050403.1-201	-0.0898	-0.436	-0.3462	-1.2712	0.1606	0.418
AP001062.1-201	-0.4113	-0.5014	-0.0901	-1.0644	0.6728	0.8629
MIR600HG-201	-0.5151	-0.5538	-0.0387	-1.0272	0.8678	0.9489
LINC02245-201	-0.6206	-0.6973	-0.0767	-1.0546	0.7402	0.9045
AP000253.1-201	-1.3637	-0.6149	0.7488	1.6804	0.0586	0.2494
LINC02575-201	0.437	0.5949	0.1579	1.1156	0.7488	0.9103
LINC01831-201	-0.7161	-0.3384	0.3777	1.2993	0.1658	0.4224
SORCS3-AS1-201	-0.561	-0.2945	0.2665	1.2029	0.1905	0.4597
AC013733.1-201	0.1037	-0.0504	-0.1541	-1.1127	0.5305	0.7764
AL451069.3-201	-0.7325	-0.2146	0.5179	1.4319	0.0657	0.264
LINC00572-201	-0.1872	-0.5798	-0.3926	-1.3128	0.0065	0.0666
TMEM72-AS1-201	0.1189	0.0911	-0.0278	-1.0194	0.9141	0.9642
AL359924.1-201	0.1502	0.0173	-0.1329	-1.0965	0.1251	0.361
AC092634.3-201	0.3159	0.1441	-0.1718	-1.1265	0.4862	0.7397
HIPK1-AS1-204	-0.3819	-0.5284	-0.1465	-1.1069	0.3055	0.5895
SATB2-AS1-205	-1.1354	-1.1356	-0.0002	-1.0001	0.9759	0.9894
LINC01105-205	-0.0725	-0.0143	0.0582	1.0412	0.868	0.9489
AC120114.1-201	0.3901	0.4482	0.058	1.0411	0.8158	0.9342
AL161630.1-201	0.0563	0.1477	0.0914	1.0654	0.277	0.5511
LINC01813-201	-0.4922	-0.3038	0.1884	1.1395	0.2443	0.5176
AL158066.1-201	-0.5885	-0.9029	-0.3144	-1.2435	0.0946	0.3067
Z97205.1-201	0.3475	0.0196	-0.328	-1.2552	0.1957	0.468
GLIS3-AS1-201	1.1853	0.4198	-0.7655	-1.7	0.0058	0.0614
AC012368.1-206	-0.078	-0.4629	-0.3849	-1.3058	0.3676	0.6508
LINC00307-201	-0.8822	-0.5179	0.3643	1.2872	0.0813	0.2892
TLR8-AS1-201	-0.2802	0.5876	0.8679	1.8249	0.0007	0.0141
AC007557.1-201	-0.165	-0.138	0.027	1.0189	0.8663	0.9489
AL157834.2-201	0.4233	-0.8773	-1.3006	-2.4632	0.0001	0.0036
LINC00841-201	-0.0138	0.0333	0.0472	1.0332	0.287	0.5645
AC007038.1-201	-0.2535	-0.4768	-0.2232	-1.1673	0.5137	0.7634
AC092164.1-201	-0.2621	-0.1128	0.1493	1.1091	0.4765	0.733
AL353653.1-201	-0.0505	-0.0463	0.0042	1.0029	0.9414	0.9733
LINC01431-203	-0.3377	-0.643	-0.3053	-1.2357	0.0997	0.3167
HNF4A-AS1-201	-2.0922	-1.497	0.5952	1.5107	0.0772	0.2837
LINC01231-201	-0.1162	-0.1054	0.0108	1.0075	0.9466	0.975
LINC01792-201	0.3054	0.1745	-0.1308	-1.0949	0.3634	0.6473
AL137802.1-201	0.0532	0.3234	0.2702	1.206	0.219	0.491
AL137005.1-201	-0.2802	-0.2473	0.0328	1.023	0.8689	0.9489
BARX1-AS1-201	-1.1308	-0.3184	0.8125	1.7562	0.0039	0.0449
LINC01647-201	-0.8672	-0.6907	0.1765	1.1302	0.4464	0.7129
ELFN1-AS1-202	-0.4253	-0.1513	0.274	1.2092	0.3066	0.5905
LINC01293-201	-1.2909	-0.833	0.4579	1.3735	0.4253	0.697
AC019117.1-203	1.7973	1.8203	0.023	1.0161	0.9659	0.9843
AL135908.1-202	-0.034	0.2329	0.2668	1.2032	0.4625	0.7242
LINC00703-202	-0.2692	-0.2889	-0.0197	-1.0137	0.8855	0.9542
LINC01875-201	0.1444	0.2784	0.134	1.0973	0.0551	0.241
DDC-AS1-201	-0.3652	-0.2213	0.1439	1.1049	0.5067	0.7575
AL691447.2-201	0.0821	0.1494	0.0674	1.0478	0.8115	0.9335
OLMALINC-201	-1.0556	-0.4089	0.6467	1.5655	0.0779	0.2837
AL109615.2-201	0.0905	0.844	0.7534	1.6858	0.0173	0.1208
LINC02535-201	-1.881	-1.3455	0.5355	1.4494	0.3437	0.6304
TTTY10-202	-0.0779	-0.051	0.0269	1.0188	0.9437	0.9733
AL844175.1-201	0.2278	0.4077	0.1799	1.1328	0.48	0.7348
LINC01706-201	-1.173	-0.8747	0.2983	1.2297	0.0562	0.2431
AC017002.3-201	-0.1499	0.2489	0.3988	1.3184	0.0705	0.2741
RPS6KA2-AS1-201	-0.5966	-0.2311	0.3654	1.2883	0.175	0.4385
AL451069.1-201	-0.2282	-0.4554	-0.2272	-1.1706	0.2431	0.5169
LINC01056-201	0.0918	0.0461	-0.0457	-1.0322	0.4099	0.6829
LINC00894-208	-0.3332	0.1114	0.4447	1.361	0.2596	0.5262
LINC01448-201	-0.1084	0.1766	0.285	1.2184	0.1774	0.44
AL161785.1-201	2.0555	1.5306	-0.5249	-1.4388	0.1753	0.4385
LINC01653-201	-0.3522	-0.4133	-0.0611	-1.0433	0.8052	0.9322
AC098934.2-201	-0.7551	-0.4974	0.2578	1.1956	0.3716	0.6543
TTTY4C-201	-0.1792	-0.0155	0.1637	1.1202	0.1093	0.3363
LINC01563-201	0.0969	-0.1141	-0.2111	-1.1575	0.4421	0.7101
LINC01722-201	0.0384	0.0281	-0.0103	-1.0072	0.9417	0.9733
TRAF3IP2-AS1-207	-0.6901	-0.694	-0.004	-1.0028	0.9771	0.9894
AC234772.2-201	-0.5826	-0.6622	-0.0796	-1.0567	0.8793	0.9532
ELOVL2-AS1-202	0.5308	-0.0102	-0.541	-1.455	0.0725	0.2755
LINC00355-201	-0.5926	0.6523	1.2449	2.37	0.0646	0.2626
ST7-AS1-201	0.2548	0.1085	-0.1462	-1.1067	0.3714	0.6543
LINC00445-202	0.2463	0.1468	-0.0996	-1.0715	0.5622	0.8069
TRPM2-AS-202	-1.1498	0.025	1.1748	2.2576	0.012	0.0997
MIR155HG-201	0.4862	0.5993	0.1131	1.0815	0.6359	0.8495
LINC01657-201	-0.3218	0.1165	0.4384	1.3551	0.0656	0.264
AC079922.2-201	-0.114	0.3336	0.4476	1.3637	0.0033	0.0408
LINC01883-201	-0.5184	-0.0676	0.4508	1.3668	0.0914	0.3042
LINC01812-201	0.1857	0.265	0.0793	1.0565	0.3192	0.6088
FP325330.1-201	-0.6183	-0.3004	0.3179	1.2465	0.0512	0.2328
AP000696.1-201	0.0695	0.0983	0.0287	1.0201	0.8054	0.9322
AL021396.1-202	-0.2367	-0.2175	0.0192	1.0134	0.8846	0.9542
AP006216.2-201	-0.1233	-0.1692	-0.0459	-1.0323	0.768	0.921
LINC02530-201	0.2897	0.3793	0.0896	1.0641	0.6809	0.8681
AL358473.1-202	-0.8714	-0.5897	0.2817	1.2157	0.2034	0.4778
LINC01013-205	0.2068	-0.2838	-0.4906	-1.405	0.1298	0.3669
AL122019.1-202	-0.2966	-0.3274	-0.0308	-1.0216	0.8795	0.9532
AL606760.1-201	-0.1252	0.9227	1.048	2.0676	5.7099e-05	0.0022
TNK2-AS1-201	0.8296	0.0224	-0.8072	-1.7498	0.0092	0.0828
GJA10-202	0.1222	0.1984	0.0762	1.0543	0.0792	0.2856
AC226101.2-201	0.5513	-0.0453	-0.5965	-1.5121	0.0239	0.1478
Z99756.1-201	-0.6878	-0.6887	-0.0009	-1.0007	0.9945	0.9957
AC005224.1-201	-0.8024	-0.5024	0.3001	1.2312	0.1252	0.361
Z82195.2-202	0.2303	0.0499	-0.1804	-1.1332	0.3517	0.6395
AC007009.1-201	-0.4615	0.1004	0.562	1.4763	0.0796	0.2861
LINC02070-201	0.0105	0.1736	0.1631	1.1197	0.4961	0.7519
ADAMTS9-AS2-201	0.7177	-1.1094	-1.8272	-3.5484	1.3567e-06	0.0003
LINC02085-201	0.3757	0.4045	0.0289	1.0202	0.9058	0.9597
NDUFB2-AS1-201	-0.0781	0.1512	0.2293	1.1723	0.1519	0.404
FOXP1-AS1-201	-0.4316	-0.587	-0.1554	-1.1137	0.2934	0.572
AC147067.1-201	0.8077	0.3773	-0.4305	-1.3477	0.1415	0.3851
C3orf85-201	-3.2658	-3.0522	0.2136	1.1596	0.5776	0.8109
LINC00698-203	-0.8899	-0.1435	0.7464	1.6776	0.001	0.0175
AC092910.3-202	-0.2549	0.3501	0.605	1.521	0.0164	0.1194
LINC02029-201	0.643	0.1045	-0.5385	-1.4525	0.1053	0.3294
AC008040.1-204	-0.5163	-0.4675	0.0489	1.0344	0.7829	0.927
LINC00173-201	-0.5336	0.0983	0.6319	1.5496	0.0384	0.1979
MYLK-AS1-202	-0.3665	-0.3302	0.0363	1.0255	0.8023	0.9322
LINC00880-201	-0.6554	0.427	1.0824	2.1176	0.0038	0.0443
PSMD6-AS2-201	0.1841	-0.459	-0.6431	-1.5617	0.0013	0.0204
LINC02023-201	-1.2265	-1.395	-0.1684	-1.1238	0.2811	0.557
AC004690.2-201	0.3358	0.4011	0.0653	1.0463	0.7447	0.9072
DUBR-203	1.0052	0.4503	-0.555	-1.4691	0.0879	0.3014
LINC00973-201	0.0433	1.1522	1.1089	2.1569	0.0316	0.1771
LINC00115-201	-0.2762	-0.3379	-0.0617	-1.0437	0.7676	0.921
AC082651.3-201	-0.4162	-0.3152	0.1009	1.0725	0.3642	0.6473
LINC00852-201	0.132	-0.0232	-0.1552	-1.1136	0.4013	0.6779
AC021074.3-201	-0.8892	-0.5302	0.3591	1.2826	0.2103	0.481
AC074386.1-201	0.0824	-0.3156	-0.398	-1.3177	0.2322	0.4995
IGSF11-AS1-201	-0.1956	0.1266	0.3222	1.2503	0.1307	0.3669
LINC00996-201	0.2959	0.171	-0.1249	-1.0904	0.6034	0.8325
AC082651.1-201	-1.0942	-1.3659	-0.2717	-1.2073	0.3313	0.6148
AC093627.4-202	-0.8125	-0.4762	0.3362	1.2625	0.0595	0.2494
LINC00518-202	0.1037	0.1273	0.0236	1.0165	0.7496	0.9103
MNX1-AS1-201	-1.6142	1.0077	2.6219	6.1557	2.4436e-06	0.0003
ADAMTS9-AS2-203	1.3895	-0.8646	-2.254	-4.7702	1.3482e-09	1.2983e-06
LINC02042-201	-0.3902	0.3242	0.7144	1.6408	0.0548	0.2409
AC093010.2-201	0.2168	0.4912	0.2744	1.2095	0.379	0.6571
LINC00477-201	-0.2846	-0.4348	-0.1502	-1.1097	0.3448	0.6313
AC006252.1-201	-0.1851	-0.1104	0.0747	1.0532	0.7029	0.8802
AC092910.3-201	-0.4936	-0.1023	0.3914	1.3116	0.0061	0.0627
AC093627.4-201	-0.1764	0.0475	0.2239	1.1679	0.3647	0.6473
AC109466.1-209	-1.6852	-1.1954	0.4898	1.4043	0.0502	0.2322
AC117394.2-201	-0.459	-0.3128	0.1462	1.1066	0.4543	0.7172
LINC02016-201	2.016	-0.1417	-2.1576	-4.4618	2.0158e-06	0.0003
AC002310.2-202	-0.5108	-0.3406	0.1702	1.1252	0.2229	0.4936
AC093010.2-202	-0.1531	-0.0646	0.0885	1.0633	0.6199	0.8396
LINC00488-201	-0.3445	-0.382	-0.0376	-1.0264	0.8701	0.9489
LINC02047-201	-0.015	0.2369	0.2519	1.1908	0.1676	0.424
TCL6-210	-1.1653	-0.7595	0.4057	1.3248	0.1749	0.4385
SUCLG2-AS1-203	0.8811	0.0324	-0.8487	-1.8009	3.4848e-05	0.0018
LINC01213-202	-0.1175	0.6754	0.7928	1.7325	0.0171	0.1204
FOXP1-IT1-201	-0.5722	-0.4282	0.144	1.105	0.6926	0.8719
SBF2-AS1-201	-0.071	0.1911	0.2622	1.1993	0.3321	0.6151
LINC00682-201	-0.015	0.1524	0.1674	1.123	0.2327	0.4995
AL049840.1-201	-0.4007	-0.5031	-0.1024	-1.0735	0.713	0.8882
LINC00682-202	0.3123	0.4734	0.1611	1.1181	0.3816	0.6585
AC099508.1-201	0.2638	0.2248	-0.039	-1.0274	0.8809	0.9532
AC022113.1-201	-0.5863	-0.4524	0.1338	1.0972	0.4504	0.7157
SEC24B-AS1-201	-0.1945	-0.181	0.0135	1.0094	0.9349	0.9733
AP001922.1-201	-0.6174	-0.989	-0.3716	-1.2938	0.0567	0.2431
LINC02273-201	-0.2672	-0.0201	0.2471	1.1868	0.3376	0.6217
AC008966.1-203	-0.4889	0.4295	0.9184	1.89	0.0036	0.0425
PLA2G4E-AS1-201	0.0562	0.0484	-0.0078	-1.0054	0.9746	0.9894
AC083805.1-201	0.1843	0.5094	0.3251	1.2528	0.2095	0.4804
DNAJC3-AS1-201	-0.2052	0.3033	0.5085	1.4226	0.0605	0.2522
LINC002481-201	-0.1759	-0.2098	-0.0339	-1.0237	0.8315	0.9389
Z84485.1-202	-0.4037	0.1506	0.5543	1.4685	0.1303	0.3669
RRS1-AS1-201	-1.0311	-1.024	0.0071	1.0049	0.9804	0.9917
UBR5-AS1-201	0.3899	0.2297	-0.1602	-1.1175	0.2698	0.5401
MGC16275-201	0.4284	0.2387	-0.1897	-1.1405	0.2482	0.5176
AC012377.1-201	-0.3439	-0.0629	0.2811	1.2151	0.3563	0.6413
LINC00900-201	-0.0605	0.1288	0.1893	1.1402	0.2878	0.5645
LINC02325-201	0.0265	0.3423	0.3158	1.2447	0.2217	0.4935
GPRC5D-AS1-202	0.1637	0.0486	-0.115	-1.083	0.636	0.8495
LINC00920-201	1.0153	-0.3201	-1.3353	-2.5233	6.8158e-05	0.0025
AC107067.1-201	-0.1079	0.3046	0.4125	1.331	0.1302	0.3669
CSTF3-AS1-201	-0.4243	-0.4009	0.0234	1.0164	0.8535	0.9461
AC010198.1-201	0.1795	0.3432	0.1638	1.1202	0.4108	0.6833
FLJ31104-201	0.5362	-0.0185	-0.5547	-1.4688	0.0926	0.3042
AC092378.1-202	-0.1884	0.0124	0.2007	1.1493	0.1202	0.3561
AC087667.1-201	-0.4506	-0.125	0.3256	1.2532	0.1237	0.36
AC113382.1-201	-0.4568	0.0805	0.5373	1.4512	0.0165	0.1196
SNHG10-201	0.3124	0.1204	-0.192	-1.1423	0.4394	0.71
LINC02458-201	0.0105	0.3274	0.317	1.2457	0.2253	0.4975
MIR210HG-201	-0.3934	0.508	0.9013	1.8678	0.0017	0.0259
LINC01585-201	-0.7995	-0.7672	0.0323	1.0226	0.8539	0.9461
DDX11-AS1-201	-0.8056	-0.2473	0.5583	1.4725	0.0003	0.0067
AP000802.1-201	-0.6165	-0.1583	0.4582	1.3738	0.015	0.1132
AP000873.2-208	0.0245	-0.1469	-0.1714	-1.1262	0.5709	0.8097
AC022075.1-201	-0.4867	-0.3743	0.1124	1.081	0.7074	0.883
DACT3-AS1-201	0.1136	-0.0513	-0.1649	-1.1211	0.2091	0.4804
AC090061.1-201	-0.2425	-0.0182	0.2243	1.1682	0.285	0.5623
AC026250.1-201	0.5759	0.3728	-0.203	-1.1511	0.2603	0.5262
NRAV-201	0.942	0.4161	-0.526	-1.4399	0.0866	0.3005
GS1-24F4.2-201	-0.7466	-0.728	0.0186	1.013	0.9134	0.9642
AC100861.1-202	-0.2213	0.7451	0.9664	1.954	0.002	0.0285
AC090515.2-201	-0.146	-0.6245	-0.4785	-1.3933	0.0211	0.1385
AC092718.1-201	-0.4335	0.0014	0.435	1.3519	0.129	0.3669
NEAT1-202	-0.3678	-0.4776	-0.1099	-1.0791	0.776	0.9237
AC018797.2-201	0.4438	0.1456	-0.2982	-1.2296	0.1622	0.4188
AC044802.1-201	-0.5871	-0.0168	0.5702	1.4848	0.0085	0.0805
LINC00535-201	0.3064	-0.3314	-0.6378	-1.556	0.0406	0.2049
AC087521.1-201	1.8055	0.1909	-1.6146	-3.0624	4.9923e-05	0.0021
AC091948.1-201	0.6627	0.4952	-0.1675	-1.1231	0.5729	0.8102
AC005920.1-201	-0.8713	-0.9035	-0.0322	-1.0226	0.8965	0.955
AC107959.2-201	0.4448	0.2326	-0.2122	-1.1584	0.1506	0.4017
CKMT2-AS1-202	-0.1103	-0.3714	-0.2611	-1.1984	0.1376	0.3782
AC046130.1-201	0.2754	0.3828	0.1074	1.0773	0.6193	0.8396
AC096746.1-201	0.0306	0.0776	0.047	1.0331	0.8326	0.9389
AC107959.1-202	1.2922	0.5799	-0.7124	-1.6385	0.0323	0.18
AC009060.1-202	0.1484	0.0126	-0.1359	-1.0987	0.5258	0.7744
AC009292.1-201	-0.1989	-0.4384	-0.2394	-1.1805	0.0217	0.1403
AC008781.2-201	-0.4272	-0.5314	-0.1042	-1.0749	0.7451	0.9072
AC055717.1-201	-0.1499	-0.2816	-0.1317	-1.0955	0.5315	0.7767
LINC01267-201	0.2611	-0.2067	-0.4678	-1.383	0.16	0.4177
AL139353.2-202	-0.7833	0.196	0.9793	1.9715	0.0027	0.0367
AC004590.1-201	0.2441	0.2689	0.0247	1.0173	0.9132	0.9642
FGF10-AS1-201	-0.2084	-0.5509	-0.3425	-1.2679	0.087	0.3005
LINC01085-201	0.1679	0.0545	-0.1134	-1.0818	0.6526	0.8606
AC036214.1-201	-0.184	-0.2241	-0.0401	-1.0282	0.8309	0.9389
HHIP-AS1-201	0.8214	0.0215	-0.7998	-1.7409	0.0936	0.3044
AC112204.2-201	-0.08	-0.3888	-0.3088	-1.2387	0.0268	0.1575
AC109349.1-201	-0.7743	0.1167	0.8909	1.8544	0.0201	0.1345
AC008443.4-201	-0.5734	-0.4554	0.118	1.0852	0.4028	0.6781
NOP14-AS1-201	-0.7091	-0.9494	-0.2402	-1.1812	0.4453	0.7124
LINC02114-201	0.0497	0.4666	0.4168	1.335	0.0752	0.2809
LINC02148-201	0.1918	-0.1921	-0.3838	-1.3048	0.0151	0.1132
LINC02431-201	-0.1552	-0.0889	0.0663	1.047	0.7913	0.9296
AC023794.1-201	-0.3255	-0.3466	-0.0211	-1.0148	0.9059	0.9597
LINC00958-201	-0.4234	-0.175	0.2484	1.1879	0.2601	0.5262
PCAT4-201	-0.2237	-0.2972	-0.0735	-1.0523	0.649	0.8606
LINC02239-201	0.0737	0.0932	0.0195	1.0136	0.8404	0.9411
NPHP3-AS1-202	0.1582	0.165	0.0068	1.0048	0.9191	0.9665
AP002884.3-201	-0.7079	-0.6546	0.0533	1.0376	0.8757	0.9532
AP000866.2-201	1.0621	0.2837	-0.7784	-1.7152	0.0081	0.0768
AC016687.3-202	-0.1745	-0.2429	-0.0684	-1.0485	0.5497	0.7951
LINC01019-201	0.0379	0.1883	0.1504	1.1099	0.1999	0.4742
AC025171.2-202	0.1556	0.5856	0.4301	1.3473	0.1241	0.3601
AC012339.1-201	0.1572	0.303	0.1458	1.1063	0.2354	0.5026
AC092546.1-202	-0.1516	-0.279	-0.1274	-1.0923	0.5386	0.7835
AL121796.1-201	-0.8038	-0.6872	0.1166	1.0842	0.6651	0.8606
TMEM108-AS1-202	-0.316	-0.2892	0.0268	1.0188	0.8907	0.9542
CACNA1G-AS1-202	-0.3671	-0.1181	0.249	1.1884	0.1648	0.421
AC018682.1-201	-0.1732	-0.348	-0.1749	-1.1289	0.5374	0.783
AC007663.2-201	0.5407	0.4732	-0.0676	-1.048	0.7839	0.927
LINC01957-201	-0.261	-0.2085	0.0525	1.0371	0.7079	0.883
LINC02059-202	-0.7306	-0.3411	0.3895	1.31	0.0706	0.2741
AC109830.1-203	-0.3702	0.4296	0.7998	1.7409	0.0564	0.2431
PART1-202	-0.1983	-0.5008	-0.3025	-1.2333	0.11	0.3374
AC078881.1-201	0.2678	-0.0168	-0.2846	-1.2181	0.4966	0.7519
LINC02172-201	0.0754	0.2222	0.1468	1.1071	0.4156	0.69
AC113410.2-201	0.1697	0.4005	0.2308	1.1735	0.0395	0.2021
TRIM52-AS1-202	0.099	0.3867	0.2877	1.2207	0.3367	0.6211
LINC02145-202	0.3778	0.2092	-0.1687	-1.124	0.5768	0.8109
AC110760.2-201	0.0845	-0.0933	-0.1777	-1.1311	0.5284	0.7746
LINC02221-201	-0.8987	-0.5464	0.3522	1.2765	0.0917	0.3042
AC117500.2-201	-0.1251	-0.2172	-0.0921	-1.0659	0.4204	0.6921
AL133372.2-203	0.0819	0.2014	0.1195	1.0864	0.6325	0.8484
LINC02381-201	-0.1191	-0.3506	-0.2314	-1.174	0.365	0.6473
LINC02171-201	0.1699	0.2221	0.0521	1.0368	0.7152	0.8898
AC008525.1-201	0.1735	0.2752	0.1017	1.073	0.4566	0.7185
LINC02119-201	0.0891	0.2743	0.1852	1.137	0.4518	0.7167
SMAD1-AS2-201	-0.3565	0.1535	0.51	1.4241	0.1057	0.3294
AC092335.1-201	-0.3853	0.0634	0.4487	1.3648	0.1185	0.3534
AC104958.1-201	-0.5731	-0.2577	0.3154	1.2444	0.4778	0.7338
LINC02116-201	-0.4019	-0.6459	-0.2439	-1.1842	0.4256	0.697
LINC02510-201	0.1802	0.2076	0.0273	1.0191	0.6585	0.8606
LINC02493-201	-1.1499	-0.8619	0.2881	1.221	0.0894	0.3041
LINC02199-202	-0.5472	-0.5333	0.0139	1.0097	0.944	0.9733
AC139493.2-202	-0.4137	-0.1729	0.2408	1.1817	0.3231	0.6117
LINC02225-201	0.1638	0.1617	-0.002	-1.0014	0.9908	0.9949
LINC01234-201	-0.0627	-0.2447	-0.1821	-1.1345	0.5792	0.8118
AC096736.3-201	-0.0925	0.0103	0.1029	1.0739	0.2993	0.5822
LINC02380-201	0.0019	0.0617	0.0598	1.0423	0.8053	0.9322
AP003555.1-202	-0.9284	-1.4302	-0.5018	-1.416	0.1504	0.4017
AC096734.1-201	-0.055	-0.0598	-0.0047	-1.0033	0.986	0.9932
LINC02149-201	0.2092	0.1641	-0.045	-1.0317	0.8286	0.9389
AP003716.1-202	-1.0668	-0.9748	0.0919	1.0658	0.6846	0.8686
AC104827.1-202	-0.0713	-0.1475	-0.0762	-1.0542	0.7706	0.9229
AC141928.1-201	0.7344	0.1808	-0.5535	-1.4677	0.0222	0.1422
LINC01365-202	-0.3377	-0.0579	0.2798	1.214	0.2131	0.4851
HHIP-AS1-203	0.9425	-1.1319	-2.0744	-4.2117	0.0011	0.0188
LINC00290-201	0.0437	-0.0775	-0.1213	-1.0877	0.6044	0.8326
LINC02475-202	-0.6315	-0.4438	0.1878	1.139	0.4555	0.7179
AC023136.1-201	-0.2449	-0.6612	-0.4162	-1.3344	0.0282	0.1624
LINC02150-201	-0.4569	-0.4786	-0.0217	-1.0151	0.8539	0.9461
PURPL-205	-1.1815	-0.0495	1.1321	2.1917	0.0326	0.18
AC092611.1-201	-0.671	-0.1214	0.5497	1.4638	0.0878	0.3014
AC093909.4-201	0.0609	0.3767	0.3158	1.2447	0.063	0.258
CTD-2194D22.4-201	0.0885	0.0986	0.01	1.007	0.9382	0.9733
FOXD1-AS1-201	-0.0129	1.1357	1.1486	2.2169	0.0329	0.18
LINC02071-201	-0.2776	-0.2134	0.0642	1.0455	0.6624	0.8606
AC097537.1-201	0.5124	0.013	-0.4995	-1.4137	0.1677	0.424
LINC02123-201	0.225	0.2933	0.0683	1.0485	0.688	0.8706
LINC00605-201	-0.2568	-0.1034	0.1534	1.1122	0.427	0.697
LINC01618-201	0.1323	0.2563	0.1239	1.0897	0.4005	0.6779
LINC02353-201	0.1969	0.0375	-0.1594	-1.1168	0.3264	0.6117
AC097375.3-201	-0.0959	-0.0911	0.0048	1.0034	0.9857	0.9932
AC109830.1-202	0.0314	0.2847	0.2532	1.1919	0.2069	0.4787
FLJ12825-201	-0.7037	0.0169	0.7206	1.6478	0.0536	0.2369
LINC01091-204	0.1286	0.0005	-0.1281	-1.0929	0.6397	0.852
LINC02382-201	0.1955	0.8181	0.6225	1.5396	0.1262	0.3626
SLIT2-IT1-201	2.3876	0.7257	-1.6619	-3.1643	8.1955e-05	0.0029
AC008663.2-201	-0.2169	-0.2209	-0.004	-1.0028	0.9689	0.9853
LINC02099-201	-0.0089	0.0357	0.0446	1.0314	0.7657	0.921
LINC00051-201	0.275	0.2509	-0.024	-1.0168	0.834	0.9393
MIR3142HG-201	-1.0556	-0.2259	0.8297	1.7773	0.041	0.2057
CARMN-205	-0.513	-1.0696	-0.5566	-1.4708	0.0177	0.1225
ZFHX4-AS1-201	-0.1727	0.056	0.2286	1.1717	0.4744	0.7322
LINC01845-201	-0.3571	0.2176	0.5746	1.4893	0.0348	0.1875
FER1L6-AS1-201	-1.1456	-1.1988	-0.0532	-1.0376	0.8125	0.9335
LINC01111-201	0.353	0.4414	0.0884	1.0632	0.7243	0.8942
AC104051.2-201	-0.0731	-0.0308	0.0422	1.0297	0.7915	0.9296
LINC01289-201	0.1997	0.2517	0.0521	1.0367	0.7411	0.9046
AC025524.2-211	-0.3789	-0.0879	0.291	1.2235	0.4842	0.7385
AC021355.1-202	-0.4349	-0.3619	0.073	1.0519	0.6339	0.849
EXTL3-AS1-203	-0.1707	-0.0718	0.0989	1.0709	0.696	0.8739
AC022784.6-204	-0.9396	-0.7628	0.1768	1.1303	0.4754	0.7325
HPYR1-201	-0.9075	-0.3933	0.5142	1.4282	0.0838	0.2955
LINC00588-201	-0.6472	-0.6082	0.039	1.0274	0.9152	0.9642
PVT1-212	-0.5774	0.0161	0.5935	1.5089	0.0956	0.3079
AC091946.1-201	-0.0976	-0.1235	-0.026	-1.0182	0.8778	0.9532
LINC01419-201	-0.4121	0.4338	0.8459	1.7974	0.1899	0.4595
LINC02153-202	-0.2894	-0.6742	-0.3848	-1.3057	0.1777	0.44
AC016065.1-203	-0.2534	0.2112	0.4646	1.3799	0.1087	0.3356
AC004080.2-201	-0.8854	-0.812	0.0733	1.0521	0.6582	0.8606
AC019270.1-201	-0.1138	-0.4385	-0.3247	-1.2524	0.1047	0.3294
AC138356.3-201	-0.0638	-1.1752	-1.1115	-2.1606	7.2615e-07	0.0003
AC090921.1-201	0.132	0.4844	0.3523	1.2766	0.0911	0.3042
AC037486.1-201	-0.5953	0.1168	0.7121	1.6381	0.0268	0.1575
OTUD6B-AS1-202	0.2163	-0.0369	-0.2533	-1.1919	0.3264	0.6117
AC100800.1-201	-1.2542	-0.5672	0.687	1.6099	0.0118	0.0989
HOXA-AS3-205	-0.2207	-0.6815	-0.4608	-1.3763	0.2192	0.491
AC068858.1-201	-0.0205	-0.0846	-0.0641	-1.0454	0.6889	0.8706
AP002957.1-203	-0.9643	0.7632	1.7274	3.3114	3.0496e-05	0.0018
RAB30-AS1-202	0.248	0.2023	-0.0457	-1.0322	0.8307	0.9389
AP003110.1-201	-0.6429	0.0011	0.644	1.5626	0.1148	0.3445
ZNF252P-AS1-201	-0.3957	-0.084	0.3118	1.2412	0.4198	0.6921
AC010624.1-201	-0.284	-0.4656	-0.1816	-1.1341	0.3155	0.6029
AC005833.1-201	-0.3942	-0.6134	-0.2192	-1.1641	0.0715	0.2753
AP000873.2-209	0.1201	-0.0168	-0.1369	-1.0995	0.5922	0.8218
TBX5-AS1-201	3	1.2981	-1.7019	-3.2533	0.003	0.0382
AP002008.3-201	0.3564	-0.3254	-0.6818	-1.6041	0.0127	0.1035
AP000873.2-207	-0.2947	-0.3299	-0.0353	-1.0247	0.8948	0.9543
AP002008.1-201	0.3982	0.3249	-0.0733	-1.0521	0.844	0.9418
AC103796.1-201	0.3182	0.1718	-0.1465	-1.1069	0.5016	0.7547
TOLLIP-AS1-201	-0.326	-0.2414	0.0846	1.0604	0.5499	0.7951
AC105219.1-201	-0.0293	0.1001	0.1294	1.0938	0.4992	0.7524
TRAF3IP2-AS1-209	-0.1617	-0.4449	-0.2832	-1.2169	0.3246	0.6117
AP000911.1-202	-0.4469	-0.2304	0.2165	1.1619	0.05	0.2322
NAV2-AS4-201	-0.4014	0.0203	0.4217	1.3395	0.1007	0.3189
KIRREL3-AS2-201	-0.4519	-0.1212	0.3308	1.2577	0.2501	0.5176
RAB30-AS1-207	0.0972	-0.1464	-0.2435	-1.1839	0.1874	0.4547
CASC23-201	-0.7047	-0.7307	-0.026	-1.0182	0.9352	0.9733
LINC02282-201	0.1723	0.272	0.0998	1.0716	0.5706	0.8097
PXN-AS1-201	-0.5076	-0.7518	-0.2442	-1.1844	0.2158	0.4896
LINC02419-201	-0.0525	-0.178	-0.1254	-1.0908	0.5074	0.7575
LINC00943-203	-0.2196	0.0385	0.2581	1.1959	0.2501	0.5176
CLIP1-AS1-201	-0.0932	-0.5393	-0.4461	-1.3623	0.2342	0.5011
AC007368.1-201	0.2924	0.3946	0.1022	1.0734	0.5957	0.8255
LINC00944-201	-0.2959	-0.1073	0.1886	1.1397	0.617	0.8396
LINC02443-201	-0.19	0.664	0.8541	1.8076	0.0017	0.0259
AC005885.1-205	-0.1481	1.0578	1.2059	2.3068	0.0355	0.1886
AC117500.3-201	-0.6662	-0.6072	0.059	1.0417	0.8321	0.9389
LINC00943-204	-0.4543	-0.4675	-0.0132	-1.0092	0.9121	0.9642
AC006065.4-204	-0.9358	-0.3399	0.5959	1.5114	0.0013	0.0204
AC021054.1-201	0.3326	0.2828	-0.0498	-1.0351	0.8286	0.9389
AC073862.1-201	1.693	-0.3114	-2.0044	-4.0121	8.505e-06	0.0006
AC087235.1-201	0.1989	0.1766	-0.0223	-1.0156	0.9201	0.9665
MRGPRF-AS1-201	0.2184	-0.5034	-0.7217	-1.6492	1.5201e-06	0.0003
AC069503.1-201	0.7996	0.5829	-0.2168	-1.1621	0.3838	0.6613
AC156455.1-201	0.0322	-0.0029	-0.0351	-1.0246	0.8991	0.9557
LINC02387-201	-0.6556	-0.2396	0.416	1.3342	0.006	0.0627
AC006065.3-201	0.2481	0.3045	0.0563	1.0398	0.6846	0.8686
LINC02421-201	-0.7012	-0.8964	-0.1953	-1.1449	0.4789	0.7343
TMEM132D-AS2-201	-0.4639	-0.5547	-0.0908	-1.0649	0.7337	0.9035
ADGRD1-AS1-202	0.1389	-0.1115	-0.2504	-1.1895	0.2462	0.5176
SMCR5-201	0.3507	0.1249	-0.2258	-1.1695	0.3248	0.6117
LINC02350-201	-0.4421	0.4962	0.9382	1.9162	0.028	0.1624
AC018653.3-201	-0.338	-0.1073	0.2308	1.1734	0.0915	0.3042
LINC02375-201	-0.0052	-0.0864	-0.0813	-1.0579	0.686	0.8693
AC007622.2-202	-0.3093	-0.3964	-0.087	-1.0622	0.7399	0.9045
AC068888.1-207	0.4755	0.2032	-0.2722	-1.2077	0.2485	0.5176
LINC00485-201	-0.5118	-0.1283	0.3835	1.3045	0.0528	0.2355
AC079385.2-201	0.1318	0.1491	0.0174	1.0121	0.9271	0.9704
AC117377.1-201	-0.1681	0.0168	0.1849	1.1367	0.1142	0.3436
LINC01234-202	-0.3291	0.0084	0.3375	1.2636	0.4474	0.7133
MIR4307HG-201	-0.6879	-0.5364	0.1515	1.1107	0.6004	0.8307
AC023509.2-201	0.5099	-0.0937	-0.6036	-1.5195	0.0157	0.1164
LINC02424-201	0.1443	0.454	0.3096	1.2394	0.4409	0.7101
CASC18-202	-0.0468	0.2853	0.3321	1.2588	0.0522	0.2341
AC089998.1-201	-0.0519	-0.278	-0.2261	-1.1696	0.1663	0.4225
TMPO-AS1-202	-0.3577	0.5164	0.8741	1.8329	0.0029	0.038
AC091534.1-201	-0.5811	-0.2229	0.3583	1.2819	0.2071	0.4787
RMST-205	1.4288	-0.6233	-2.0521	-4.147	3.8456e-05	0.0018
AC117498.2-202	0.0933	0.2302	0.1369	1.0995	0.3887	0.6672
AC012085.2-201	-1.3686	-1.0185	0.3501	1.2746	0.0928	0.3042
TRHDE-AS1-204	1.351	-0.7942	-2.1453	-4.4237	3.6635e-05	0.0018
LINC02402-201	0.1413	0.2097	0.0684	1.0485	0.3989	0.6763
LINC02426-201	-0.5982	-0.8032	-0.205	-1.1527	0.3734	0.6562
LINC02388-201	-0.6885	-0.8021	-0.1136	-1.0819	0.6542	0.8606
AL589743.1-201	-0.7147	-0.1628	0.5519	1.466	0.3265	0.6117
AC011611.3-201	0.1969	0.08	-0.1169	-1.0844	0.6738	0.8629
AC087897.2-201	0.1647	0.1743	0.0095	1.0066	0.7968	0.9322
AC027288.3-203	0.4407	-0.2169	-0.6576	-1.5775	0.0004	0.0096
AL137786.1-201	0.5481	0.2907	-0.2574	-1.1953	0.3966	0.6763
ITPK1-AS1-201	-0.623	-0.9397	-0.3166	-1.2454	0.073	0.2755
AL139193.2-201	0.3725	0.2794	-0.0931	-1.0666	0.6778	0.8656
LINC02318-201	-0.5011	-0.3186	0.1825	1.1348	0.4197	0.6921
DIO2-AS1-201	-0.9501	-0.7209	0.2292	1.1722	0.6135	0.8379
FOXN3-AS2-201	-0.4776	-0.3327	0.1449	1.1057	0.4324	0.7046
CRAT37-201	0.0998	-0.2153	-0.3151	-1.2441	0.3513	0.6395
SNHG14-221	-0.4008	-0.4367	-0.0359	-1.0252	0.8895	0.9542
FAM181A-AS1-202	0.5378	0.4915	-0.0464	-1.0327	0.8637	0.9489
LINC02274-201	0.045	0.5767	0.5317	1.4457	0.0103	0.0897
LINC00638-201	-0.1732	0.3398	0.513	1.427	0.0102	0.0897
AL121809.1-201	-0.5699	-0.5173	0.0526	1.0371	0.8604	0.9469
AL096869.2-202	-0.0863	0.159	0.2453	1.1853	0.1415	0.3851
AL355922.2-201	-1.3642	-0.2712	1.093	2.1332	5.825e-05	0.0022
LINC00645-203	-0.4074	0.7557	1.1631	2.2394	0.0359	0.1889
AL117192.1-202	-0.7104	-0.6089	0.1015	1.0729	0.5372	0.783
AC015914.1-201	-0.3244	-1.0115	-0.6871	-1.61	0.0523	0.2341
ZNF710-AS1-201	-0.1296	-0.0211	0.1085	1.0781	0.3988	0.6763
LINC01581-202	-0.1096	0.0027	0.1123	1.0809	0.6647	0.8606
EWSAT1-206	-1.2276	-0.9294	0.2982	1.2296	0.1999	0.4742
AC105133.1-201	0.223	0.4408	0.2178	1.163	0.437	0.7084
INAFM2-201	0.9552	0.7367	-0.2186	-1.1636	0.3797	0.6571
CERNA1-202	-0.5236	-0.2748	0.2488	1.1882	0.4268	0.697
AC022613.3-201	0.5343	-0.2621	-0.7964	-1.7368	0.009	0.0827
AC104590.1-201	0.5787	0.6404	0.0617	1.0437	0.8225	0.9353
AC104574.1-201	0.1645	0.1974	0.0329	1.0231	0.7878	0.9287
LINC02349-201	0.1146	0.448	0.3334	1.26	0.0684	0.2687
LINC00566-201	-0.6514	-0.5735	0.0779	1.0555	0.7884	0.9287
LINC01616-201	0.1209	0.1226	0.0017	1.0012	0.9946	0.9957
AC112236.1-201	-0.4316	-0.045	0.3866	1.3073	0.441	0.7101
LINC01963-201	1.6273	0.8212	-0.806	-1.7484	0.0032	0.0402
AC034111.1-201	-0.3711	-0.4873	-0.1162	-1.0839	0.4207	0.6921
AC141586.3-201	-0.0771	-0.1757	-0.0986	-1.0707	0.5808	0.8119
LCMT1-AS2-201	-0.6672	0.1589	0.8261	1.7729	0.0001	0.0042
LINC02249-202	0.2897	0.4067	0.1171	1.0845	0.7352	0.9042
LINC00565-201	0.2593	-0.2823	-0.5417	-1.4557	0.0372	0.1948
LINC00622-201	0.3165	-0.0897	-0.4062	-1.3252	0.0244	0.1485
VPS9D1-AS1-202	-0.6066	-0.4329	0.1737	1.128	0.2617	0.5262
LINC00838-201	0.2208	0.2843	0.0636	1.0451	0.3987	0.6763
IL21R-AS1-201	-0.6023	-0.89	-0.2877	-1.2207	0.0442	0.2165
AC015818.2-201	-0.3205	-0.0917	0.2288	1.1718	0.2034	0.4778
AC068870.1-201	-0.4219	0.0227	0.4446	1.3609	0.0512	0.2328
FBXL19-AS1-201	-0.0131	0.1451	0.1583	1.1159	0.5812	0.8119
LINC02555-201	1.3772	0.4558	-0.9213	-1.8939	0.0457	0.2178
AL138976.2-201	-0.2646	-0.0759	0.1887	1.1398	0.2567	0.5256
SNHG9-202	0.0367	0.0151	-0.0216	-1.0151	0.8586	0.9469
AL118516.1-201	0.1066	0.093	-0.0137	-1.0095	0.9437	0.9733
LINC01898-201	0.0287	-0.1285	-0.1572	-1.1151	0.5859	0.8142
AL035425.3-201	0.0814	-0.0197	-0.1011	-1.0726	0.6326	0.8484
AC010336.2-201	-0.4666	-0.4189	0.0476	1.0336	0.7623	0.9188
AL158212.3-201	0.6247	0.1679	-0.4569	-1.3726	0.0596	0.2494
LINC00261-202	-0.9137	-1.7274	-0.8138	-1.7578	0.1128	0.3428
AC036108.3-201	-0.6426	-0.6663	-0.0237	-1.0166	0.8686	0.9489
UBL7-AS1-203	-0.5837	-0.318	0.2658	1.2023	0.1366	0.3771
LINC01003-201	0.7569	0.5453	-0.2117	-1.158	0.5849	0.814
LINC01917-201	0.3986	0.0594	-0.3392	-1.265	0.328	0.6121
AC009414.2-201	0.4624	-0.3361	-0.7986	-1.7394	0.0005	0.0108
AL049796.1-201	1.1139	0.2277	-0.8862	-1.8483	0.0055	0.0596
AF096876.1-201	0.2284	-0.2423	-0.4708	-1.3858	0.0142	0.1096
AC022167.2-201	-0.4628	0.0422	0.505	1.4191	0.0712	0.2753
AC136285.1-201	-0.7194	-0.5281	0.1912	1.1417	0.2417	0.515
LINC01477-201	0.2423	1.0859	0.8436	1.7945	0.0155	0.1156
AL441883.1-201	0.0287	0.1519	0.1232	1.0891	0.6268	0.8454
AL353746.1-201	-0.3105	-0.5264	-0.2159	-1.1614	0.1936	0.4648
LINC01686-201	0.1007	0.1616	0.0608	1.0431	0.7758	0.9237
LINC00563-201	-0.1584	-0.1815	-0.0231	-1.0161	0.8938	0.9542
AP001527.1-201	0.333	0.3868	0.0538	1.038	0.8133	0.9335
AC007066.2-202	-0.985	-1.1592	-0.1742	-1.1283	0.4212	0.6921
AC092447.8-201	-0.6796	-0.5968	0.0828	1.0591	0.6187	0.8396
LINC02140-202	0.1761	0.4436	0.2675	1.2037	0.1855	0.4523
JHDM1D-AS1-201	-0.7344	0.2003	0.9347	1.9115	0.0027	0.0369
LINC01834-201	-0.4139	-0.2225	0.1914	1.1419	0.3074	0.5908
DKFZP434H168-201	-0.3138	-0.2704	0.0434	1.0305	0.8107	0.9335
AL050341.2-201	0.3537	0.15	-0.2037	-1.1517	0.4713	0.7322
AP000223.1-201	0.5412	0.1128	-0.4285	-1.3458	0.0501	0.2322
HEXA-AS1-201	-0.7355	-0.5396	0.1959	1.1454	0.1764	0.44
AC138627.1-208	-0.7817	-0.9265	-0.1448	-1.1056	0.6525	0.8606
AC023043.1-201	-0.3742	-0.0558	0.3184	1.247	0.0136	0.1094
AC006058.1-201	1.0044	0.1894	-0.815	-1.7593	0.0019	0.0284
AC009812.4-201	0.2637	-0.252	-0.5157	-1.4296	0.0591	0.2494
LINC01566-202	-1.2073	-1.135	0.0724	1.0514	0.7845	0.927
VENTXP1-201	0.1415	0.2051	0.0636	1.0451	0.8808	0.9532
AL807752.5-201	0.0783	-0.406	-0.4843	-1.3989	0.0171	0.1204
AC023830.1-201	-0.0347	0.1397	0.1744	1.1285	0.3607	0.6444
AC139256.1-201	-0.7229	-0.585	0.1378	1.1002	0.6658	0.8606
AC007823.1-201	0.3352	0.2829	-0.0523	-1.0369	0.8564	0.9465
LINC02192-201	-0.3203	-0.089	0.2314	1.174	0.2329	0.4995
LINC02175-201	-0.2344	-0.2156	0.0188	1.0131	0.9287	0.971
AC087388.1-201	-0.443	0.0432	0.4862	1.4007	0.1219	0.3591
AC087500.1-202	-0.5743	-0.4022	0.1721	1.1267	0.5646	0.8079
AC015909.3-201	-0.8426	-0.8255	0.0171	1.012	0.9203	0.9665
DLGAP1-AS2-201	0.1538	0.0733	-0.0805	-1.0574	0.8356	0.94
LINC01569-202	0.2277	0.3973	0.1696	1.1248	0.5412	0.786
AC040160.1-201	0.0448	0.2176	0.1728	1.1272	0.3872	0.6658
AC024361.2-201	0.1143	0.1279	0.0136	1.0095	0.3469	0.634
AC139530.1-201	0.1297	0.3604	0.2307	1.1734	0.0034	0.0408
LINC02091-201	-0.4654	-0.6782	-0.2129	-1.159	0.5101	0.7604
AC127496.1-201	0.5486	0.5615	0.013	1.009	0.9529	0.9782
AC007638.1-201	0.0363	-0.2916	-0.3279	-1.2552	0.1717	0.4329
AC015813.1-202	-0.7361	-0.5497	0.1865	1.138	0.258	0.5262
AC005725.1-201	-0.4201	-0.472	-0.0519	-1.0366	0.7601	0.9176
DLGAP1-AS3-201	0.1948	-0.2725	-0.4673	-1.3825	0.0478	0.2254
LINC02076-201	-0.4479	-0.1958	0.2521	1.1909	0.1428	0.3867
AP002478.1-201	-0.0395	0.4195	0.4589	1.3745	0.0929	0.3042
WWC2-AS2-201	-0.1306	-0.4762	-0.3455	-1.2706	0.1554	0.4099
L3MBTL4-AS1-201	-0.438	-0.0995	0.3385	1.2645	0.2617	0.5262
PCAT18-201	-1.9697	-1.1881	0.7817	1.7191	0.0817	0.2892
AA06-201	0.677	-0.1082	-0.7852	-1.7234	0.0093	0.083
LINC00909-202	-1.6142	-2.0457	-0.4315	-1.3486	0.0719	0.2753
AP005329.2-201	-0.2232	-0.2662	-0.043	-1.0302	0.7979	0.9322
LINC00526-201	-0.4429	0.106	0.549	1.463	0.0618	0.2552
AC018521.3-201	0.1824	0.1966	0.0142	1.0099	0.5274	0.7744
MAFG-AS1-201	0.0091	0.2861	0.277	1.2117	0.0813	0.2892
AC012417.1-201	0.0199	0.0453	0.0254	1.0178	0.8504	0.9461
CYP4F35P-201	-0.3535	-0.4742	-0.1207	-1.0873	0.5655	0.8079
GATA6-AS1-202	-0.7297	-2.1671	-1.4374	-2.7082	0.0002	0.0052
ESRG-201	-0.2221	0.0265	0.2487	1.1881	0.0246	0.1488
AC015813.1-203	-0.698	-0.4969	0.2011	1.1496	0.2275	0.4984
AL354674.1-201	-0.499	-0.5473	-0.0484	-1.0341	0.803	0.9322
ZNF667-AS1-201	1.1778	0.3296	-0.8482	-1.8002	0.0015	0.0229
AC021517.1-202	-0.207	-0.1752	0.0319	1.0224	0.7752	0.9237
AC016493.1-201	0.3942	0.4486	0.0544	1.0384	0.8433	0.9418
AP001198.1-201	-0.0449	-0.3088	-0.2639	-1.2007	0.229	0.4984
AC011815.1-201	-0.204	0.1832	0.3872	1.3078	0.1987	0.4736
AC010980.2-201	-0.0981	0.0343	0.1324	1.0961	0.6289	0.8471
AC006213.2-201	-0.0546	0.0061	0.0607	1.043	0.5053	0.7575
LINC01864-201	-0.0914	-0.1992	-0.1078	-1.0776	0.6635	0.8606
AC006116.8-202	-0.2919	-0.3884	-0.0965	-1.0692	0.6267	0.8454
AC020916.1-201	-0.1357	-0.4754	-0.3397	-1.2655	0.1647	0.421
LINC01538-201	0.1772	0.416	0.2388	1.18	0.2623	0.5262
LDLRAD4-AS1-201	-0.6184	-0.6258	-0.0074	-1.0051	0.9834	0.993
AC139100.1-201	0.6537	0.8004	0.1467	1.107	0.5276	0.7744
TNRC6C-AS1-201	0.2441	0.7197	0.4756	1.3905	0.0239	0.1478
LINC01924-201	0.107	0.2764	0.1694	1.1246	0.1276	0.3647
LINC00906-206	0.2049	0.4976	0.2927	1.225	0.2056	0.4787
AC005394.1-201	-0.0684	0.0677	0.1361	1.0989	0.3274	0.6121
AC010680.1-201	1.6728	-0.0385	-1.7112	-3.2744	1.2597e-06	0.0003
RNF157-AS1-204	0.157	1.233	1.076	2.1082	0.0127	0.1035
KCNJ2-AS1-201	1.1585	0.0843	-1.0742	-2.1056	0.001	0.0184
AC006557.1-201	-0.6304	-0.1724	0.4579	1.3736	0.0923	0.3042
AC091152.2-201	-0.5726	-0.419	0.1536	1.1123	0.5255	0.7744
AC010327.3-201	-0.3315	-0.0844	0.2471	1.1868	0.1228	0.3595
AC004917.1-204	0.3893	0.1212	-0.2681	-1.2043	0.4054	0.6801
AC021683.3-202	-0.775	-0.8892	-0.1142	-1.0823	0.3789	0.6571
FAM95B1-212	-0.5629	-0.6091	-0.0462	-1.0325	0.8872	0.9542
AC123912.2-201	-0.3787	-0.6287	-0.25	-1.1892	0.2824	0.5585
LINC01838-201	-0.2629	-0.3079	-0.045	-1.0317	0.8003	0.9322
AC005498.3-201	0.3525	0.1914	-0.1612	-1.1182	0.6058	0.8334
AC026304.1-201	-0.0882	0.0942	0.1824	1.1348	0.57	0.8097
AC006262.1-203	-0.4389	-0.0553	0.3836	1.3046	0.0194	0.1307
AL031282.2-201	0.1928	0.3058	0.113	1.0815	0.5837	0.8134
LINC00664-203	0.4557	0.253	-0.2026	-1.1508	0.5664	0.8081
LINC02135-201	0.0919	-0.1834	-0.2753	-1.2103	0.1457	0.393
MZF1-AS1-202	0.4716	0.9298	0.4582	1.3738	0.0924	0.3042
AC010300.1-201	-0.6722	-0.7643	-0.0921	-1.0659	0.7888	0.9287
CARD8-AS1-201	0.599	0.0328	-0.5661	-1.4806	0.0142	0.1096
MKNK1-AS1-201	-0.8651	-0.3103	0.5548	1.469	0.025	0.1507
AL513318.2-201	-1.0011	-0.3363	0.6648	1.5854	0.0455	0.2178
MAP2K4P1-202	0.6354	0.37	-0.2654	-1.202	0.0402	0.2048
AL158152.1-201	-0.2682	-0.8247	-0.5566	-1.4708	0.0512	0.2328
AC146944.4-201	0.5972	0.255	-0.3421	-1.2676	0.1809	0.4434
AL356488.2-201	-0.0388	-0.0876	-0.0488	-1.0344	0.8438	0.9418
AC078795.2-201	0.4626	0.0313	-0.4314	-1.3485	0.0241	0.1478
CARMN-210	-0.6654	-1.2661	-0.6007	-1.5165	0.0092	0.0828
AC087203.3-201	0.7556	0.5133	-0.2423	-1.1828	0.3969	0.6763

## Sheet: TCGA Dataset T-Test
Supplementary Table 1. The student’s T-Test was performed for the Affymetrix dataset, Agilent dataset, and TCGA dataset.
TCGA Dataset Two Sample T-Test Results
variable	Normal	Tumor	tissue type => Tumor vs Normal.Estimate	tissue type => Tumor vs Normal.FoldChange	tissue type => Tumor vs Normal.RawPValue	tissue type => Tumor vs Normal.FDR_BH
TTTY1-201	-6.634	-6.6295	0.0045	1.0031	0.7973	0.836
TTTY11-201	-6.6439	-6.6439	0	1	.	.
D21S2088E-201	-6.6311	-6.6195	0.0116	1.0081	0.541	0.6018
LINC01931-201	-6.3417	-6.4742	-0.1325	-1.0962	0.0557	0.0935
LINC00208-201	-6.6439	-6.6439	0	1	.	.
MIR31HG-201	-5.1448	-2.4016	2.7432	6.6954	1.1022e-17	1.2501e-16
CSPG4P2Y-201	-6.6439	-6.5832	0.0606	1.0429	0.0632	0.104
LINC00471-201	-3.2127	-2.4747	0.738	1.6679	1.1995e-06	4.48e-06
FO393415.1-201	-3.3109	-5.569	-2.2581	-4.7835	6.1339e-32	1.6299e-30
C9orf106-201	-3.9464	-4.5048	-0.5584	-1.4726	0.0005	0.0013
LINC02363-201	-5.1838	-4.6175	0.5662	1.4807	0.0004	0.001
AL049647.1-201	-6.2032	-6.0489	0.1544	1.1129	0.1621	0.2309
AL161668.1-201	-6.5532	-5.9419	0.6113	1.5276	4.5308e-05	0.0001
LINC01658-201	-5.8979	-5.5912	0.3067	1.2368	0.0773	0.1241
LINC00304-201	-5.9944	-6.1803	-0.1859	-1.1375	0.0766	0.1236
HECW1-IT1-201	-6.63	-6.5681	0.0619	1.0439	0.106	0.1616
LINC00305-201	-5.5363	-6.2526	-0.7163	-1.643	4.5631e-06	1.6136e-05
TTTY14-201	-4.1557	-4.9616	-0.8059	-1.7483	0.0073	0.0152
LINC00314-201	-6.603	-6.4906	0.1124	1.081	0.094	0.1465
LINC00334-201	-5.513	-5.9601	-0.4471	-1.3633	0.0073	0.0153
TTTY13-201	-6.6439	-6.6303	0.0136	1.0094	0.3184	0.3912
LINC01116-202	-5.3559	-4.4196	0.9363	1.9136	0.0001	0.0003
GATA3-AS1-201	-5.8878	-5.7375	0.1504	1.1099	0.2893	0.3753
NBPF5P-201	-6.5638	-6.5246	0.0392	1.0275	0.452	0.5177
AL162431.2-201	-1.1536	-1.2581	-0.1045	-1.0751	0.362	0.4339
C20orf204-201	-4.7612	-3.6139	1.1473	2.2149	5.6094e-08	2.5448e-07
AFDN-DT-201	-2.0819	-2.6278	-0.5459	-1.4599	6.3222e-05	0.0002
AC004893.2-201	-0.7154	-1.3131	-0.5978	-1.5134	8.9856e-09	4.4688e-08
CROCCP2-201	-1.0151	-1.0999	-0.0847	-1.0605	0.5067	0.5712
AC015969.1-201	-6.198	-6.2102	-0.0122	-1.0085	0.9143	0.9303
AC105053.1-201	-2.4176	-5.0002	-2.5826	-5.9903	1.1592e-34	3.9929e-33
LINC00311-201	-5.5438	-5.8848	-0.341	-1.2667	0.0154	0.03
AL645568.1-201	-1.823	-1.9682	-0.1453	-1.1059	0.0815	0.1299
SPATA42-201	-6.6118	-6.5626	0.0492	1.0347	0.3777	0.4492
LINC00619-201	-3.6585	-4.9507	-1.2921	-2.4489	4.497e-08	2.0704e-07
LINC01854-201	-6.6206	-5.7654	0.8553	1.8091	1.6049e-06	5.9228e-06
MAMDC2-AS1-201	-3.6319	-4.7147	-1.0828	-2.1182	3.3525e-12	2.2925e-11
AL391987.4-201	-4.5956	-4.8178	-0.2222	-1.1665	0.3732	0.4444
AC007389.1-202	-4.6223	-4.9999	-0.3776	-1.2992	0.0233	0.0436
FAM239A-201	-2.7545	-1.5827	1.1718	2.253	0.0049	0.0106
FAM99A-201	-6.5458	-6.5733	-0.0275	-1.0192	0.6001	0.658
C1RL-AS1-201	-2.8572	-2.2762	0.581	1.4959	7.4162e-05	0.0002
WT1-AS-201	-5.4616	-4.5926	0.869	1.8264	9.6274e-05	0.0003
LINC02026-201	-4.6147	-4.4966	0.1181	1.0853	0.4242	0.4907
TTTY5-201	-6.5731	-6.6355	-0.0624	-1.0442	0.0527	0.0897
LINC01139-201	-1.9839	-2.0577	-0.0738	-1.0525	0.8116	0.849
MIR4435-2HG-203	3.1811	4.4065	1.2254	2.3382	1.2134e-18	1.5674e-17
AL031587.1-201	-6.0657	-5.8322	0.2335	1.1757	0.059	0.0983
TTLL11-IT1-201	-5.5493	-4.5694	0.98	1.9724	4.6203e-07	1.8285e-06
AL121899.1-202	-1.4806	-2.5344	-1.0538	-2.076	0.0016	0.0038
HSPC324-201	1.5416	-3.0164	-4.558	-23.5552	3.4996e-57	1.0849e-54
IL10RB-AS1-201	1.4406	0.7064	-0.7341	-1.6634	4.473e-11	2.7368e-10
LINC00354-201	-6.6439	-6.5999	0.044	1.0309	0.1627	0.2314
LINC00092-201	-0.0777	-2.5644	-2.4867	-5.605	4.1276e-39	1.8279e-37
AC235097.1-201	-6.6306	-6.5931	0.0375	1.0264	0.2639	0.3456
AL122058.1-201	-5.8409	-5.0818	0.7591	1.6925	0.0003	0.0008
AL136531.1-201	-3.0987	-2.9304	0.1683	1.1238	0.3792	0.4499
LINC00606-201	-6.6439	-6.6258	0.0181	1.0126	0.089	0.14
LINC01734-201	-6.6114	-6.634	-0.0226	-1.0158	0.3127	0.3912
LINC01191-201	-5.5178	-5.2751	0.2427	1.1832	0.1393	0.205
LINC00427-201	-6.3196	-6.1177	0.202	1.1503	0.1322	0.1955
LINC00525-201	-5.3546	-3.2869	2.0677	4.1922	2.9689e-17	3.2483e-16
LINC01312-201	-6.5341	-6.4663	0.0678	1.0481	0.4441	0.5111
CCDC148-AS1-201	-6.6285	-6.612	0.0165	1.0115	0.5434	0.6038
LINC00894-201	-4.8832	-4.9716	-0.0884	-1.0632	0.7109	0.7543
AL139039.3-201	-5.4778	-4.2372	1.2406	2.3629	1.0978e-10	6.5869e-10
AC104823.1-201	-6.5671	-6.3774	0.1897	1.1405	0.0898	0.1409
LINC01720-201	-6.6439	-6.5854	0.0584	1.0413	0.2192	0.2984
AC000099.1-202	-6.636	-6.5346	0.1014	1.0728	0.034	0.0612
AL031666.1-201	-0.8902	-2.4064	-1.5162	-2.8605	4.705e-20	6.7317e-19
AC131097.3-201	-4.5035	-3.6475	0.856	1.81	0.0002	0.0005
LINC00421-201	-6.5766	-6.4949	0.0816	1.0582	0.1612	0.2299
HCP5-201	3.8747	3.6782	-0.1964	-1.1459	0.068	0.1112
AC002480.4-201	-6.3364	-6.3224	0.0141	1.0098	0.8742	0.9054
LINC00887-202	-6.4273	-4.5403	1.8869	3.6985	1.935e-27	3.7491e-26
LINC00437-201	-6.2106	-6.5286	-0.3181	-1.2467	0.0004	0.0012
LINC00330-201	-6.1394	-5.8652	0.2742	1.2093	0.0471	0.0819
LINC01704-201	-6.182	-5.8346	0.3474	1.2723	0.0269	0.0493
EGOT-201	-4.026	-3.0456	0.9804	1.973	9.6103e-06	3.2859e-05
TPTEP1-203	-3.9262	-5.1002	-1.174	-2.2564	1.0624e-05	3.6193e-05
VPS13A-AS1-201	-6.553	-6.4873	0.0656	1.0465	0.3387	0.4096
LINC01128-201	-1.4764	-1.2468	0.2296	1.1725	0.0978	0.1513
PIK3CD-AS2-201	-0.4395	0.417	0.8565	1.8106	1.2526e-08	6.1965e-08
AC007349.3-201	-6.5672	-6.4621	0.1051	1.0756	0.1003	0.1545
ELFN1-AS1-201	-5.9711	-4.5944	1.3767	2.5967	2.155e-08	1.0225e-07
LINC01614-201	-2.9895	0.4621	3.4516	10.9403	3.8946e-33	1.1684e-31
AC108058.1-202	-5.8545	-5.1896	0.6649	1.5854	0.0001	0.0004
KIAA1614-AS1-201	-2.2036	-1.1663	1.0373	2.0524	2.3572e-08	1.1128e-07
LINC01656-201	-6.5526	-6.5368	0.0158	1.011	0.8025	0.8404
AP006285.2-201	-6.6439	-6.6439	0	1	.	.
AL139352.1-201	-3.6686	-3.5437	0.1248	1.0904	0.4923	0.5586
AC092155.1-202	-5.7869	-6.5329	-0.746	-1.6771	1.6216e-10	9.5446e-10
LINC01689-201	-6.6439	-6.6439	0	1	.	.
LINC00630-201	-4.719	-4.2696	0.4494	1.3655	0.0003	0.0008
ZNF503-AS1-201	0.2731	-1.432	-1.7051	-3.2605	2.4151e-17	2.6738e-16
AL691426.1-201	-6.6439	-6.5027	0.1412	1.1028	0.0089	0.0182
DAB1-AS1-201	-6.6227	-6.6368	-0.0141	-1.0098	0.3964	0.4649
CLDN10-AS1-201	-6.2276	-4.1482	2.0794	4.2264	2.5815e-11	1.6332e-10
MIATNB-201	-0.4628	-0.3648	0.098	1.0703	0.4019	0.4701
LINP1-201	-4.6698	-1.6628	3.0071	8.0392	3.232e-18	4.0619e-17
AC092535.1-201	-5.4218	-5.1509	0.2708	1.2065	0.0836	0.1325
AC011752.1-203	-6.6282	-6.5964	0.0318	1.0223	0.3932	0.4617
CHL1-AS1-201	-6.2848	-5.6358	0.649	1.5681	2.3558e-05	7.7969e-05
LINC01756-201	-6.4016	-6.3623	0.0394	1.0277	0.598	0.6566
LINC02579-201	-6.0153	-5.589	0.4263	1.3438	0.0054	0.0115
AL645608.1-202	-2.1518	-2.9137	-0.7619	-1.6957	8.7881e-05	0.0003
AL160408.1-201	-6.523	-5.7304	0.7925	1.7321	1.0349e-09	5.6616e-09
LINC01424-201	-4.4904	-3.9805	0.5099	1.4239	0.0031	0.007
LINC00705-201	-6.368	-5.6675	0.7005	1.6251	1.681e-07	7.1058e-07
AC080129.2-201	-5.4454	-5.0716	0.3738	1.2958	0.0909	0.1422
AL391704.2-201	-6.6341	-6.6243	0.0098	1.0068	0.6556	0.7065
AL391832.2-201	-4.1737	-3.8809	0.2928	1.225	0.1203	0.1802
LINC01219-201	-5.8418	-5.6235	0.2183	1.1633	0.2137	0.2918
PACRG-AS2-201	-6.6439	-6.6044	0.0395	1.0278	0.1005	0.1545
AL450469.1-201	-6.2074	-6.4899	-0.2825	-1.2163	0.0166	0.0319
AC093690.1-201	-4.2789	-4.2747	0.0042	1.0029	0.9782	0.9825
AC106869.1-203	-4.5363	-4.8077	-0.2714	-1.207	0.1013	0.1552
LINC00317-201	-6.6439	-6.6439	0	1	.	.
LINC02097-201	-6.4233	-6.0731	0.3502	1.2747	0.0007	0.0017
LINC00410-201	-6.6278	-6.5923	0.0355	1.0249	0.2713	0.3543
FLJ37035-201	-5.1712	-4.855	0.3162	1.245	0.1697	0.238
LINC00308-201	-6.6439	-6.5869	0.057	1.0403	0.0442	0.0784
LINC01788-201	-6.5642	-6.3201	0.2441	1.1844	0.0004	0.001
AC019117.2-201	-2.135	-3.1073	-0.9723	-1.962	0.0005	0.0012
LINC01687-202	-6.6439	-6.1526	0.4913	1.4057	5.9396e-05	0.0002
LINC01494-201	-6.6142	-6.3764	0.2378	1.1792	0.0002	0.0005
LINC01527-201	-6.4551	-5.4525	1.0026	2.0036	1.2732e-08	6.2318e-08
AL445430.1-201	-6.3687	-6.4733	-0.1046	-1.0752	0.2627	0.3446
AL109924.2-201	-6.4267	-4.9037	1.523	2.8739	3.4868e-18	4.2114e-17
AL162391.1-201	-6.6312	-6.5891	0.042	1.0296	0.1809	0.2514
AP002884.3-203	-0.2604	-0.4132	-0.1528	-1.1117	0.3279	0.4002
TP73-AS1-202	-4.1171	-5.1994	-1.0823	-2.1174	1.3753e-07	5.8671e-07
AL021937.1-201	-4.1663	-3.9022	0.264	1.2008	0.0996	0.1536
AP001605.1-201	-6.4299	-6.1884	0.2415	1.1822	0.0022	0.0052
SH3BP5-AS1-202	1.0087	-0.2823	-1.291	-2.4469	2.0701e-20	3.0571e-19
AL360093.1-201	-5.5574	-5.0427	0.5147	1.4287	0.0034	0.0076
AC092809.4-201	-3.7507	-3.6546	0.0961	1.0689	0.5026	0.5673
AL139125.1-201	-6.3275	-6.0222	0.3053	1.2357	0.0238	0.0443
NUTM2A-AS1-205	-1.9279	-1.46	0.4679	1.3831	2.3523e-06	8.5789e-06
LINC00574-201	-5.002	-4.8131	0.1889	1.1399	0.1571	0.2267
AC104653.1-201	-5.5375	-4.7332	0.8043	1.7463	0.0003	0.0008
AC007389.3-201	-4.7615	-3.9403	0.8211	1.7668	9.5035e-06	3.2614e-05
AC074035.1-201	-6.6439	-6.5767	0.0672	1.0477	0.0577	0.0964
ENTPD3-AS1-201	1.394	0.6705	-0.7236	-1.6513	3.1892e-13	2.4924e-12
LINC01305-201	-6.5237	-4.747	1.7767	3.4264	6.1588e-16	6.2258e-15
MRGPRG-AS1-201	-6.6121	-6.3243	0.2877	1.2207	0.0019	0.0045
LINC01426-202	-2.1264	-0.7278	1.3986	2.6365	3.6429e-13	2.7999e-12
AC004947.1-201	-1.0489	-4.6845	-3.6356	-12.4285	1.5698e-47	2.0856e-45
AP000289.1-201	-6.4975	-6.3394	0.1581	1.1158	0.1089	0.1657
AL357055.3-201	-3.0973	-3.913	-0.8157	-1.7602	4.766e-13	3.5745e-12
NEXN-AS1-201	-3.376	-4.4217	-1.0457	-2.0644	1.7992e-15	1.743e-14
LINC00271-201	-2.4937	-4.1725	-1.6788	-3.2016	5.9011e-17	6.3814e-16
SOX1-OT-201	-6.4116	-6.055	0.3565	1.2804	0.0396	0.0707
BSN-AS2-201	-5.4838	-5.2277	0.2562	1.1943	0.0602	0.0998
LINC00174-204	-0.4282	-0.0518	0.3764	1.2981	0.0034	0.0076
AC007557.4-201	-6.6439	-6.6264	0.0175	1.0122	0.3184	0.3912
LINC01936-201	1.7946	-1.1808	-2.9754	-7.8645	1.1828e-40	6.111e-39
AL023755.1-203	-6.6439	-6.4221	0.2217	1.1661	0.0046	0.0101
AC010145.1-201	-6.6439	-6.5744	0.0694	1.0493	0.2284	0.3078
AC005064.1-201	-5.3416	-4.7556	0.586	1.5011	0.0042	0.0092
AL391095.1-201	-4.377	-4.0031	0.3739	1.2959	0.0302	0.0552
LINC01074-201	-6.6439	-6.6244	0.0195	1.0136	0.3184	0.3912
AC016747.1-203	-2.7216	-2.6703	0.0514	1.0363	0.9032	0.9241
LINC00857-201	-0.9915	-0.0732	0.9183	1.8899	4.0747e-07	1.6194e-06
MAP3K20-AS1-203	-4.7948	-4.2937	0.5011	1.4153	0.0003	0.0008
AC004906.1-201	-6.0582	-5.8272	0.231	1.1736	0.1059	0.1616
LINC00284-201	-5.6796	-6.1731	-0.4935	-1.4079	0.0013	0.0031
AL162425.1-201	-6.5242	-6.49	0.0343	1.024	0.6031	0.6591
AL355674.1-201	-6.6439	-6.6282	0.0157	1.0109	0.3184	0.3912
AC062015.1-201	-6.6051	-5.7898	0.8153	1.7597	9.9375e-08	4.3594e-07
AC156455.1-203	-4.075	-3.7037	0.3713	1.2935	0.0653	0.1073
AL139246.3-201	-2.2241	-2.8024	-0.5783	-1.4931	0.0024	0.0056
AL603840.1-203	-6.6439	-6.6439	0	1	.	.
SLIT1-AS1-201	-6.6439	-6.6212	0.0226	1.0158	0.1585	0.2282
IL6R-AS1-201	-2.4171	-3.3209	-0.9038	-1.8709	7.034e-10	3.9646e-09
AC007128.1-201	-6.4664	-2.4536	4.0127	16.1418	2.606e-42	1.7312e-40
AC024560.1-201	-4.033	-2.8869	1.1461	2.2131	3.9834e-06	1.4248e-05
AC016909.2-201	-5.5738	-6.3196	-0.7459	-1.677	4.639e-10	2.6306e-09
AL353148.1-202	-6.3732	-6.6048	-0.2315	-1.1741	0.0049	0.0106
LINC01315-202	-0.6145	-0.8922	-0.2777	-1.2122	0.0742	0.1207
AP001626.1-201	-5.835	-5.2502	0.5848	1.4998	3.3921e-05	0.0001
LINC01137-201	1.5355	1.7686	0.2331	1.1753	0.0318	0.0578
PITPNA-AS1-201	1.2484	2.3133	1.0649	2.092	2.61e-21	4.1141e-20
AL445433.2-201	-6.6077	-6.5603	0.0474	1.0334	0.2805	0.3653
AC099684.1-202	-5.9872	-6.3276	-0.3405	-1.2662	0.0026	0.0061
LINC00462-201	-6.0609	-4.9102	1.1508	2.2203	8.1164e-07	3.1063e-06
LINC01523-201	-6.6439	-6.5905	0.0533	1.0376	0.0828	0.1314
AL360295.1-201	-6.4136	-6.611	-0.1974	-1.1466	0.0002	0.0005
LINC00454-201	-6.6439	-6.627	0.0168	1.0117	0.3184	0.3912
BX088651.2-201	-4.639	-6.0438	-1.4048	-2.6478	5.2372e-15	4.8706e-14
AC103702.2-203	-6.5869	-6.2501	0.3367	1.2629	0.0038	0.0084
AL450384.2-201	-1.3775	-1.6992	-0.3218	-1.2499	0.0224	0.0421
AC008268.1-201	3.6057	-2.8139	-6.4195	-85.6003	1.6993e-42	1.2156e-40
AC022034.2-201	-0.3172	-0.5562	-0.239	-1.1802	0.1734	0.2429
AL021392.1-201	-2.0189	-1.3658	0.6531	1.5726	2.4072e-07	9.9056e-07
RNF144A-AS1-203	-6.5187	-6.5073	0.0113	1.0079	0.88	0.9086
MIR4290HG-201	-6.427	-6.5553	-0.1283	-1.093	0.0152	0.0297
PRKG1-AS1-202	-6.4784	-6.2016	0.2768	1.2115	0.0063	0.0133
LINC01049-201	-6.6342	-6.6439	-0.0097	-1.0067	0.3184	0.3912
AL136309.2-201	-4.1415	-4.5028	-0.3613	-1.2846	0.0028	0.0065
AL161636.1-201	-6.1478	-5.9524	0.1954	1.1451	0.1563	0.2264
LINC01741-201	-6.6439	-6.617	0.0269	1.0188	0.3184	0.3912
AL606534.4-201	-6.6439	-6.6294	0.0145	1.0101	0.3184	0.3912
LINC00313-205	-3.1571	-3.7581	-0.6009	-1.5167	0.0086	0.0176
LINC01874-201	-6.6439	-6.6439	0	1	.	.
LINC01222-201	-6.5753	-6.4951	0.0803	1.0572	0.1312	0.1942
TAF1A-AS1-202	-4.4759	-3.6684	0.8075	1.7502	0.007	0.0146
MED15P9-202	-6.5202	-5.8915	0.6287	1.5461	0.0002	0.0005
LIMD1-AS1-201	-0.4706	-0.4846	-0.014	-1.0098	0.9583	0.9655
AC099786.2-201	-6.6038	-6.4139	0.1898	1.1406	0.0031	0.007
AP001630.1-201	-6.2755	-6.1484	0.1271	1.0921	0.3357	0.4081
FRY-AS1-201	-5.8826	-5.7385	0.1441	1.1051	0.3081	0.3912
DNAJC27-AS1-204	-5.337	-5.4163	-0.0793	-1.0565	0.6882	0.7365
HMGA1P4-201	-2.4463	-2.9871	-0.5407	-1.4547	0.0168	0.0322
DEPDC1-AS1-201	-6.2492	-4.7874	1.4618	2.7545	1.5412e-19	2.1079e-18
LINC00348-201	-5.7489	-6.113	-0.3642	-1.2871	0.0178	0.0341
AL596442.1-201	-6.5424	-6.003	0.5394	1.4533	0.0006	0.0015
MEG9-201	-4.6763	-4.8643	-0.188	-1.1391	0.3047	0.3912
AL078601.2-201	-5.3576	-5.6301	-0.2724	-1.2078	0.2014	0.2771
LINC01238-203	-4.1263	-3.9086	0.2177	1.1629	0.2582	0.3411
AL138775.1-201	-6.6439	-6.6439	0	1	.	.
LINC01153-201	-6.6382	-6.6041	0.0341	1.0239	0.0774	0.1241
LINC00690-201	-6.6439	-6.6095	0.0344	1.0241	0.1638	0.2319
LINC01425-202	-6.6295	-6.4814	0.1481	1.1081	0.1195	0.1796
LINC01770-202	-2.4158	-2.9881	-0.5722	-1.4868	0.0166	0.0319
LINC01149-202	-6.2379	-6.4655	-0.2276	-1.1709	0.0021	0.005
FAM212B-AS1-201	-1.8175	-2.6003	-0.7828	-1.7205	9.5895e-08	4.2671e-07
AC096677.2-201	-6.6065	-6.5816	0.025	1.0174	0.5779	0.6376
LBX1-AS1-201	-5.198	-5.8217	-0.6236	-1.5408	4.5228e-05	0.0001
DLG1-AS1-202	-3.8338	-3.0184	0.8154	1.7598	1.2739e-06	4.739e-06
LINC00309-201	-6.524	-6.5336	-0.0096	-1.0067	0.8128	0.8492
AL445235.1-201	-6.5773	-6.6106	-0.0333	-1.0233	0.3727	0.4444
LINC01352-201	-3.8046	-5.7005	-1.8959	-3.7215	1.6912e-26	3.084e-25
AL137220.1-201	-6.511	-6.5388	-0.0278	-1.0194	0.7121	0.7543
LINC01010-201	-2.3182	-2.514	-0.1958	-1.1454	0.4181	0.4848
LINC00210-201	-6.6439	-6.5613	0.0826	1.0589	0.2512	0.3339
LINC01282-201	-6.214	-6.3481	-0.1341	-1.0974	0.1928	0.2663
AL513323.1-201	-6.4263	-6.2025	0.2238	1.1678	0.0459	0.0805
AL357558.2-201	-6.6439	-6.6231	0.0207	1.0145	0.3184	0.3912
HDHD5-AS1-202	-3.9449	-3.565	0.3799	1.3012	0.0532	0.09
AL138733.2-201	-6.576	-6.5256	0.0503	1.0355	0.3787	0.4498
LINC01087-201	-6.4679	-6.1087	0.3593	1.2828	0.0004	0.0011
AL133410.1-202	-2.7991	-3.3992	-0.6001	-1.5158	0.0058	0.0125
LINC01598-201	-6.6439	-6.609	0.0348	1.0244	0.3184	0.3912
DSCR10-201	-6.6314	-6.4648	0.1667	1.1225	0.0206	0.0391
LINC01981-201	-6.6333	-5.9201	0.7132	1.6395	7.3736e-13	5.3996e-12
AL109741.1-201	-1.3318	-4.1815	-2.8498	-7.2088	2.1499e-31	5.4039e-30
LINC01723-201	-6.5991	-6.6287	-0.0297	-1.0208	0.3977	0.4658
AL022332.1-202	-6.473	-6.3459	0.1272	1.0922	0.2556	0.3382
LINC00691-201	-6.1001	-6.4247	-0.3246	-1.2523	0.0001	0.0003
TNFRSF14-AS1-202	-1.7991	-3.0665	-1.2674	-2.4073	1.3174e-13	1.0939e-12
DPP10-AS1-201	-3.2577	-2.4112	0.8465	1.7981	0.0148	0.0289
LINC01844-201	-3.64	-5.0704	-1.4304	-2.6952	4.4701e-13	3.3799e-12
LINC00608-202	-6.6174	-6.6146	0.0028	1.0019	0.8764	0.9066
PLCE1-AS2-202	-6.357	-6.432	-0.075	-1.0534	0.4051	0.4732
SMG7-AS1-202	-6.5075	-6.3266	0.1809	1.1336	0.0491	0.0845
FAM41C-202	-4.2983	-4.8238	-0.5255	-1.4394	0.0364	0.0652
AC005281.1-201	-3.4216	-3.8519	-0.4304	-1.3476	0.0555	0.0933
LINC01797-202	-5.6499	-6.0251	-0.3752	-1.297	0.0196	0.0373
LINC00441-201	-3.8245	-4.0776	-0.2531	-1.1918	0.1124	0.1706
AC069277.1-201	-6.2711	-5.0424	1.2287	2.3436	1.6722e-09	8.9375e-09
AC006372.2-201	-6.3511	-6.3624	-0.0113	-1.0079	0.9297	0.9429
LINC00954-201	-4.2303	-3.6249	0.6054	1.5214	0.0002	0.0007
MYCNUT-201	-6.6331	-6.2895	0.3436	1.2689	6.6981e-05	0.0002
AC020571.1-202	-1.3603	-1.2251	0.1352	1.0982	0.4122	0.4797
LINC01700-201	-4.9977	-6.1348	-1.1371	-2.1994	5.0998e-15	4.7907e-14
LINC02580-201	-2.1126	-4.5267	-2.4141	-5.3298	4.5982e-32	1.2577e-30
LINC00163-201	-1.7335	-5.2724	-3.5389	-11.6232	2.6772e-59	1.2449e-56
LINC01852-201	0.2061	-1.3246	-1.5307	-2.8893	2.3654e-38	9.5646e-37
STK4-AS1-201	-3.4501	-2.7227	0.7273	1.6555	3.5874e-09	1.8849e-08
LINC01007-201	-6.6212	-6.5727	0.0485	1.0342	0.1137	0.1719
STK24-AS1-201	-3.2651	-2.6629	0.6022	1.5181	0.0001	0.0003
AL162231.2-201	0.3029	-0.3872	-0.6902	-1.6135	5.8383e-08	2.6357e-07
Z82186.1-201	-5.7395	-5.7164	0.023	1.0161	0.826	0.8603
DNAJC27-AS1-205	-3.1201	-3.9186	-0.7985	-1.7393	9.5876e-08	4.2671e-07
LINC01208-202	-6.4972	-5.099	1.3982	2.6357	8.4971e-16	8.4971e-15
LINC00595-204	-5.9343	-6.0403	-0.106	-1.0762	0.3378	0.4091
LINC00460-201	-4.9734	-3.1745	1.7989	3.4797	8.2559e-09	4.1503e-08
AC106875.1-202	-6.0911	-5.6544	0.4367	1.3535	0.0393	0.0703
MORF4L2-AS1-201	-3.7454	-3.8209	-0.0755	-1.0538	0.6111	0.6655
RAPGEF4-AS1-202	-6.6049	-6.178	0.4269	1.3444	1.3172e-09	7.1639e-09
LINC00028-201	-4.7482	-5.8476	-1.0994	-2.1426	9.6623e-08	4.2767e-07
AC076966.1-201	-6.6439	-6.6228	0.021	1.0147	0.3184	0.3912
LINC01354-202	-2.0225	-4.2126	-2.1901	-4.5635	1.9109e-35	6.8351e-34
MIR99AHG-205	-1.1714	-2.6816	-1.5102	-2.8484	5.755e-16	5.8815e-15
AL359182.1-201	-4.1971	-3.2178	0.9793	1.9715	1.7188e-05	5.7499e-05
AL357507.1-201	-6.452	-6.3888	0.0632	1.0448	0.5261	0.5888
C20orf166-AS1-202	-6.175	-6.2943	-0.1193	-1.0862	0.2843	0.3697
LINC01366-201	-2.9226	-4.5116	-1.5889	-3.0083	4.9448e-19	6.477e-18
LINC02573-201	-6.48	-6.4922	-0.0122	-1.0085	0.8684	0.9004
AC073133.2-201	-4.6918	-5.6986	-1.0068	-2.0095	5.357e-13	3.9856e-12
AC092809.2-202	-3.1622	-5.1056	-1.9435	-3.8463	6.3417e-18	7.5613e-17
AC011893.1-201	-5.8123	-4.9345	0.8778	1.8376	5.4588e-08	2.4886e-07
AL591368.1-201	-6.3473	-5.9613	0.386	1.3068	0.0002	0.0006
AL157373.2-201	-3.7355	-3.0495	0.686	1.6088	0.0022	0.0052
AC011995.1-201	-6.5927	-6.6187	-0.026	-1.0182	0.4528	0.518
LINC00242-201	-2.8086	-2.4929	0.3157	1.2446	0.0073	0.0153
C10orf71-AS1-201	-6.1916	-6.0746	0.1171	1.0845	0.4202	0.4866
SNHG3-202	1.537	2.3599	0.8229	1.769	1.6993e-12	1.1973e-11
LINC01120-201	-6.6202	-6.2036	0.4166	1.3348	1.2949e-07	5.5494e-07
CASC6-201	-6.5569	-6.4973	0.0596	1.0422	0.3883	0.4588
AL162384.1-201	-6.6023	-6.2452	0.3571	1.2809	0.0002	0.0005
DCTN1-AS1-206	-5.3986	-5.9738	-0.5752	-1.4899	6.9123e-06	2.3898e-05
FGF13-AS1-201	-3.7741	-5.0804	-1.3063	-2.4731	1.405e-10	8.3762e-10
LINC01297-201	-6.6025	-5.4828	1.1197	2.173	2.9061e-08	1.3581e-07
AL445072.1-201	-6.6017	-5.5911	1.0106	2.0148	3.2351e-10	1.8804e-09
AC011228.1-201	-6.6439	-6.6267	0.0172	1.012	0.3184	0.3912
AC019117.1-202	-2.118	-3.177	-1.059	-2.0835	9.9413e-05	0.0003
LINC01806-202	0.2858	-0.2989	-0.5848	-1.4998	0.0026	0.0061
AL590683.1-201	-5.8315	-5.8216	0.0099	1.0069	0.9483	0.9576
RNF217-AS1-201	-4.2958	-4.1894	0.1063	1.0765	0.4643	0.5298
LINC00415-201	-6.2528	-6.1482	0.1046	1.0752	0.4607	0.5263
AP006216.1-201	-6.6158	-6.5931	0.0227	1.0159	0.5751	0.6352
AC074183.1-201	-6.2683	-6.4311	-0.1628	-1.1195	0.1302	0.1931
AC012494.1-201	-6.6439	-6.5721	0.0717	1.051	0.0784	0.1252
AL118511.1-201	-3.2131	-2.9643	0.2488	1.1882	0.1364	0.2013
C21orf91-OT1-203	-6.5936	-6.4288	0.1648	1.121	0.0614	0.1013
C9orf135-AS1-201	-6.5764	-6.5357	0.0408	1.0287	0.3926	0.4615
AL121672.1-201	-4.0476	-4.0252	0.0224	1.0156	0.888	0.9118
MACROD2-AS1-201	-6.4682	-6.4178	0.0504	1.0355	0.5468	0.6069
LINC01134-202	-5.0387	-4.7022	0.3365	1.2627	0.0457	0.0804
AL035448.1-201	-4.1677	-4.6014	-0.4337	-1.3507	0.0079	0.0163
U73166.1-201	-3.2453	-3.1635	0.0818	1.0583	0.6225	0.6755
SPATA13-213	-2.5017	-3.7421	-1.2405	-2.3627	1.4948e-12	1.0612e-11
AC105339.1-203	-6.3017	-6.332	-0.0303	-1.0212	0.7022	0.7481
LINC02574-201	-4.1439	-4.7199	-0.576	-1.4907	0.0123	0.0244
AP001432.1-201	-3.2268	-2.5827	0.6441	1.5627	0.0007	0.0018
AL162419.1-201	-5.7948	-6.0863	-0.2915	-1.2239	0.0324	0.0587
KCNQ1-AS1-201	-5.1472	-5.89	-0.7428	-1.6734	4.9675e-06	1.7433e-05
LINC01692-201	-6.6439	-6.6242	0.0196	1.0137	0.0858	0.1354
AL391987.3-201	-6.6439	-6.5659	0.0779	1.0555	0.0664	0.1087
OSTM1-AS1-202	-6.6222	-6.3451	0.277	1.2117	5.6107e-05	0.0002
LINC01271-201	-4.3761	-3.0222	1.3539	2.5561	3.4802e-13	2.6971e-12
SATB2-AS1-202	-6.6439	-6.6439	0	1	.	.
ZEB1-AS1-203	-3.8599	-3.1647	0.6951	1.619	0.0048	0.0106
LINC01920-201	-6.6345	-6.4542	0.1803	1.1331	0.0008	0.0021
KCNQ1DN-201	-5.8602	-6.154	-0.2938	-1.2259	0.032	0.058
AC097468.1-201	-4.0247	-4.175	-0.1503	-1.1098	0.5239	0.5877
AL353052.2-201	-6.6287	-6.6244	0.0043	1.003	0.8193	0.8542
ACVR2B-AS1-201	-1.5157	-1.7074	-0.1917	-1.1421	0.0548	0.0923
LINC01718-201	-6.6439	-6.6439	0	1	.	.
LINC02243-201	-5.7729	-6.1832	-0.4104	-1.329	0.0013	0.0033
AL023755.1-201	-6.5529	-6.0941	0.4587	1.3743	2.2836e-07	9.439e-07
RPS10P7-201	-1.0121	-0.2591	0.753	1.6853	1.9947e-12	1.3741e-11
LINC00315-201	-4.4746	-5.488	-1.0134	-2.0187	1.6155e-16	1.7073e-15
AC004975.2-201	-4.3105	-3.7658	0.5448	1.4588	0.0094	0.0191
LINC02264-201	-6.6439	-6.6439	0	1	.	.
LINC01525-201	-6.6439	-6.5772	0.0667	1.0473	0.0917	0.1433
MEG8-205	-6.0082	-5.9831	0.0251	1.0176	0.8883	0.9118
AC002480.1-201	-3.1548	-3.4304	-0.2755	-1.2105	0.1663	0.234
RFTN1P1-201	-5.4611	-6.078	-0.6168	-1.5335	0.0012	0.003
ENO1-AS1-201	-3.221	-2.7695	0.4514	1.3674	0.0413	0.0734
LINC01134-203	-3.904	-3.4258	0.4782	1.393	0.0002	0.0005
AL157414.2-201	-6.6439	-6.6439	0	1	.	.
LINC01679-201	-0.7088	-0.9269	-0.218	-1.1632	0.1434	0.2101
AC073911.1-202	-5.4785	-6.1241	-0.6456	-1.5644	4.4306e-05	0.0001
LINC00656-201	-1.8698	-5.2494	-3.3797	-10.4085	3.1919e-53	7.4213e-51
AL442224.1-201	-5.6628	-5.116	0.5468	1.4609	0.052	0.0886
LINC00327-201	-2.3596	-3.8556	-1.496	-2.8206	1.0587e-17	1.2156e-16
AC010096.1-201	-6.6024	-6.4734	0.129	1.0936	0.0215	0.0406
AL391056.1-201	-4.6696	-2.7363	1.9333	3.8193	1.2813e-15	1.2543e-14
AC006372.3-201	-6.4237	-6.2586	0.1651	1.1212	0.026	0.0478
LINC00302-201	-6.6439	-6.362	0.2818	1.2157	0.0016	0.0039
AL109924.1-201	-6.6439	-6.4188	0.2251	1.1688	0.0004	0.0012
AC096541.1-201	-5.4831	-5.6406	-0.1575	-1.1153	0.2259	0.3062
Z94160.1-201	-6.3448	-5.9789	0.3659	1.2887	0.0005	0.0012
LINC01165-201	-3.4056	-5.6638	-2.2581	-4.7837	1.1737e-35	4.3662e-34
AL583839.1-201	-2.2834	-2.428	-0.1446	-1.1054	0.363	0.4345
LINC01015-204	-6.6439	-6.6439	0	1	.	.
LINC02549-201	-6.6439	-6.6051	0.0388	1.0272	0.1568	0.2267
FOXD2-AS1-201	-0.9799	0.0571	1.037	2.052	2.1524e-18	2.7422e-17
SLC25A5-AS1-202	-2.4688	-2.6313	-0.1625	-1.1192	0.2753	0.3591
AC002064.1-201	-5.0004	-5.6458	-0.6454	-1.5642	0.0004	0.0012
LINC01800-201	-5.6366	-5.4333	0.2033	1.1513	0.152	0.2216
FLJ31356-202	-3.1428	-2.6029	0.5399	1.4538	0.0004	0.0011
AL139237.1-201	-6.5004	-6.5803	-0.0798	-1.0569	0.266	0.348
PARD3-AS1-201	-4.1049	-3.4235	0.6814	1.6037	0.0103	0.0206
AF274858.2-201	-6.6301	-6.5811	0.049	1.0345	0.2259	0.3062
SDCBP2-AS1-201	-2.2685	-2.6706	-0.4021	-1.3214	0.0104	0.021
ATP11A-AS1-201	-5.3616	-5.9019	-0.5404	-1.4544	0.0015	0.0038
AC005772.1-201	-6.6439	-6.595	0.0489	1.0345	0.1418	0.208
AC011900.1-201	-6.6439	-6.5963	0.0476	1.0335	0.0257	0.0475
LINC01186-201	-2.2811	-3.4763	-1.1952	-2.2898	1.203e-07	5.2037e-07
LINC00323-203	-5.2271	-5.2585	-0.0315	-1.0221	0.8803	0.9086
LINC01107-201	-5.4146	-6.049	-0.6345	-1.5524	1.6955e-06	6.2323e-06
APTR-205	1.239	1.1289	-0.1101	-1.0793	0.2355	0.3155
SNHG7-204	-0.8811	-0.2426	0.6385	1.5567	4.0229e-07	1.6057e-06
AC012361.1-201	-6.6439	-6.6332	0.0107	1.0074	0.3184	0.3912
AL139275.1-201	-6.6127	-6.4292	0.1835	1.1356	0.0033	0.0073
LINC00513-201	-3.6804	-4.0234	-0.343	-1.2684	0.1218	0.1822
AP001189.1-201	-0.2518	-3.8213	-3.5695	-11.8717	1.3399e-44	1.0384e-42
AC078842.2-201	-6.6372	-6.6033	0.0339	1.0238	0.0764	0.1235
AL121970.1-201	-6.6261	-6.4934	0.1327	1.0963	0.0193	0.0368
LINC00408-201	-6.6439	-6.6276	0.0163	1.0113	0.3184	0.3912
KRBOX1-AS1-201	-6.3908	-6.4268	-0.036	-1.0252	0.6018	0.6585
AL133319.1-201	-6.6085	-6.5536	0.055	1.0388	0.2263	0.3063
AL161646.1-201	-6.3237	-6.5136	-0.1899	-1.1407	0.0486	0.0839
LINC00582-201	-3.9455	-3.1852	0.7603	1.6938	0.0059	0.0127
AL645608.3-201	-5.7371	-4.5198	1.2174	2.3252	3.6575e-11	2.2526e-10
LINC01809-201	-6.6439	-6.6439	0	1	.	.
LINC01281-202	-5.3698	-4.1073	1.2625	2.3991	1.6532e-09	8.8871e-09
AL050331.3-201	-4.9136	-4.7424	0.1712	1.126	0.2196	0.2986
AL139350.1-201	-6.6439	-6.6439	0	1	.	.
AL050403.1-201	-6.6135	-6.5421	0.0715	1.0508	0.0593	0.0985
AP001062.1-201	0.0785	-0.1954	-0.2738	-1.209	0.0047	0.0102
MIR600HG-201	-0.2395	-0.9482	-0.7087	-1.6343	5.5094e-06	1.9119e-05
LINC02245-201	-6.1202	-5.711	0.4092	1.328	0.0003	0.0008
AP000253.1-201	-5.5374	-4.9312	0.6062	1.5223	2.3314e-06	8.5363e-06
LINC02575-201	-1.5454	-2.6984	-1.153	-2.2237	4.4637e-06	1.5905e-05
LINC01831-201	-6.6439	-6.5499	0.0939	1.0673	0.0514	0.0879
SORCS3-AS1-201	-6.6439	-6.6167	0.0271	1.019	0.1646	0.2322
AC013733.1-201	-6.6439	-6.6439	0	1	.	.
AL451069.3-201	-4.0399	-4.7508	-0.7109	-1.6368	0.0001	0.0004
LINC00572-201	-6.4544	-6.5595	-0.1051	-1.0755	0.1513	0.2212
TMEM72-AS1-201	-4.7792	-5.3909	-0.6118	-1.5281	1.9514e-07	8.1748e-07
AL359924.1-201	-6.637	-6.4324	0.2046	1.1524	0.0044	0.0097
AC092634.3-201	-5.0005	-5.6882	-0.6877	-1.6107	0.0002	0.0007
HIPK1-AS1-204	-4.6036	-5.4683	-0.8647	-1.821	7.2735e-10	4.0749e-09
SATB2-AS1-205	-6.6001	-6.458	0.142	1.1035	0.0023	0.0054
LINC01105-205	-6.5432	-6.6394	-0.0962	-1.0689	0.0462	0.0806
AC120114.1-201	-3.3988	-1.8014	1.5974	3.0259	1.2772e-28	2.6994e-27
AL161630.1-201	-5.9249	-5.8342	0.0906	1.0648	0.58	0.639
LINC01813-201	-6.6439	-6.5681	0.0758	1.0539	0.0265	0.0488
AL158066.1-201	-5.2026	-5.6783	-0.4756	-1.3905	0.0236	0.0441
Z97205.1-201	-6.6172	-6.607	0.0101	1.0071	0.7854	0.8258
GLIS3-AS1-201	-2.5202	-3.8551	-1.3349	-2.5226	1.2663e-08	6.2308e-08
AC012368.1-206	-0.0842	0.0283	0.1125	1.0811	0.4663	0.5314
LINC00307-201	-6.6439	-6.6252	0.0187	1.013	0.3184	0.3912
TLR8-AS1-201	-3.9041	-4.89	-0.9859	-1.9805	6.4008e-05	0.0002
AC007557.1-201	-6.5973	-6.5931	0.0042	1.0029	0.9314	0.9436
AL157834.2-201	-4.9658	-5.3039	-0.338	-1.264	0.1152	0.1736
LINC00841-201	-6.6439	-6.6439	0	1	.	.
AC007038.1-201	-2.6686	-2.9295	-0.2609	-1.1983	0.0824	0.131
AC092164.1-201	-3.2061	-4.571	-1.3649	-2.5756	3.8454e-12	2.5915e-11
AL353653.1-201	-6.3576	-6.2625	0.0951	1.0681	0.3914	0.4611
LINC01431-203	-3.2472	-3.3613	-0.1141	-1.0823	0.6192	0.6727
HNF4A-AS1-201	-6.6439	-6.6439	0	1	.	.
LINC01231-201	-6.5895	-6.6049	-0.0154	-1.0108	0.712	0.7543
LINC01792-201	-6.4678	-5.495	0.9728	1.9627	1.2933e-13	1.0836e-12
AL137802.1-201	-2.11	-3.3223	-1.2122	-2.317	1.5791e-05	5.3016e-05
AL137005.1-201	-6.3175	-6.3161	0.0014	1.001	0.9898	0.9919
BARX1-AS1-201	-6.634	-5.8181	0.8159	1.7603	4.1648e-09	2.176e-08
LINC01647-201	-6.5359	-6.1661	0.3698	1.2922	1.253e-05	4.2376e-05
ELFN1-AS1-202	-4.6229	-2.9455	1.6774	3.1985	7.0674e-09	3.6313e-08
LINC01293-201	-3.7747	-4.5791	-0.8045	-1.7465	0.0001	0.0003
AC019117.1-203	-0.6778	-1.88	-1.2022	-2.3009	2.7821e-05	9.1751e-05
AL135908.1-202	-6.6439	-6.6228	0.0211	1.0147	0.3184	0.3912
LINC00703-202	-6.2753	-6.3638	-0.0885	-1.0633	0.228	0.3077
LINC01875-201	-6.6041	-6.5678	0.0363	1.0255	0.4467	0.5129
DDC-AS1-201	-6.5704	-6.5079	0.0625	1.0443	0.2299	0.3094
AL691447.2-201	-2.4078	-2.6234	-0.2156	-1.1612	0.0606	0.1002
OLMALINC-201	0.7496	0.6425	-0.1071	-1.0771	0.2622	0.3446
AL109615.2-201	-5.3229	-5.3111	0.0118	1.0082	0.9432	0.9534
LINC02535-201	-5.8505	-3.8055	2.045	4.1266	5.2055e-26	9.3099e-25
TTTY10-202	-5.7015	-6.06	-0.3584	-1.282	0.01	0.0202
AL844175.1-201	-6.5025	-6.0909	0.4116	1.3301	0.0064	0.0135
LINC01706-201	-6.6313	-6.6439	-0.0126	-1.0087	0.3184	0.3912
AC017002.3-201	-1.8518	-0.8992	0.9527	1.9354	2.1981e-07	9.1262e-07
RPS6KA2-AS1-201	-6.6015	-6.4271	0.1744	1.1285	0.0163	0.0314
AL451069.1-201	-2.8007	-5.162	-2.3613	-5.1385	1.7035e-24	2.9338e-23
LINC01056-201	-6.6439	-6.6334	0.0104	1.0072	0.3184	0.3912
LINC00894-208	-4.5366	-4.3998	0.1368	1.0995	0.6062	0.6617
LINC01448-201	-6.5705	-5.8739	0.6966	1.6207	9.4856e-07	3.586e-06
AL161785.1-201	1.7574	-0.1751	-1.9325	-3.8171	2.9632e-29	6.5613e-28
LINC01653-201	-6.6439	-6.5709	0.073	1.0519	0.2603	0.3433
AC098934.2-201	-5.1495	-2.8463	2.3032	4.9354	3.8306e-27	7.1248e-26
TTTY4C-201	-6.523	-6.5707	-0.0478	-1.0337	0.3245	0.3976
LINC01563-201	-5.5059	-5.6484	-0.1425	-1.1038	0.4088	0.4765
LINC01722-201	-6.5593	-6.4818	0.0776	1.0552	0.0569	0.0953
TRAF3IP2-AS1-207	-4.1207	-4.7772	-0.6565	-1.5763	0.0304	0.0553
AC234772.2-201	-5.3808	-3.9776	1.4032	2.6448	4.7541e-08	2.178e-07
ELOVL2-AS1-202	-6.5626	-5.8914	0.6712	1.5924	3.0452e-07	1.2313e-06
LINC00355-201	-6.1018	-4.3975	1.7043	3.2588	1.2035e-11	7.7724e-11
ST7-AS1-201	0.1349	-0.8041	-0.939	-1.9172	7.1051e-15	6.4781e-14
LINC00445-202	-6.5347	-6.3739	0.1609	1.1179	0.0592	0.0984
TRPM2-AS-202	-5.8993	-3.795	2.1042	4.2997	9.3118e-16	9.2127e-15
MIR155HG-201	-0.701	-0.7092	-0.0082	-1.0057	0.9574	0.9655
LINC01657-201	-6.6233	-6.59	0.0333	1.0233	0.3576	0.4294
AC079922.2-201	-1.5558	-1.1759	0.3799	1.3012	9.7814e-05	0.0003
LINC01883-201	-6.6439	-6.4591	0.1848	1.1366	0.004	0.0089
LINC01812-201	-6.4245	-5.5466	0.8779	1.8377	1.9694e-08	9.3923e-08
FP325330.1-201	-6.6238	-6.6439	-0.0201	-1.014	0.3184	0.3912
AP000696.1-201	-6.5357	-5.1841	1.3516	2.5519	1.6511e-13	1.347e-12
AL021396.1-202	-6.2579	-6.3423	-0.0844	-1.0602	0.3287	0.4006
AP006216.2-201	-6.6439	-6.6439	0	1	.	.
LINC02530-201	-6.5859	-6.5526	0.0333	1.0234	0.5277	0.5899
AL358473.1-202	-5.6218	-5.4899	0.1318	1.0957	0.3123	0.3912
LINC01013-205	-4.3105	-4.5756	-0.2651	-1.2017	0.2162	0.2948
AL122019.1-202	-6.6439	-6.6171	0.0267	1.0187	0.3184	0.3912
AL606760.1-201	-1.3755	-0.9874	0.3881	1.3086	0.0025	0.0058
TNK2-AS1-201	-3.6422	-3.5518	0.0903	1.0646	0.5341	0.5956
GJA10-202	-6.6439	-6.4431	0.2007	1.1493	0.0062	0.0132
AC226101.2-201	-3.6736	-5.6941	-2.0206	-4.0575	9.2867e-17	9.9271e-16
Z99756.1-201	-6.397	-6.5322	-0.1352	-1.0983	0.0131	0.0257
AC005224.1-201	-3.6381	-3.0687	0.5694	1.4839	5.0915e-06	1.7801e-05
Z82195.2-202	-6.6439	-6.6141	0.0297	1.0208	0.045	0.0795
AC007009.1-201	-0.36	-1.5653	-1.2053	-2.3059	0.0003	0.0007
LINC02070-201	-6.6439	-6.6223	0.0215	1.015	0.1759	0.2456
ADAMTS9-AS2-201	-3.7663	-5.8328	-2.0665	-4.1886	4.1411e-45	3.5011e-43
LINC02085-201	-6.5048	-6.0216	0.4832	1.3979	0.0012	0.0031
NDUFB2-AS1-201	-1.6508	-1.3268	0.324	1.2518	1.8325e-05	6.1084e-05
FOXP1-AS1-201	-6.5296	-6.3884	0.1413	1.1029	0.1165	0.1753
AC147067.1-201	0.6675	-0.1127	-0.7802	-1.7173	1.6028e-08	7.8043e-08
C3orf85-201	-6.6366	-6.5983	0.0383	1.0269	0.3329	0.4052
LINC00698-203	-6.4667	-6.2901	0.1766	1.1302	0.0215	0.0406
AC092910.3-202	-2.5625	-1.843	0.7195	1.6466	1.2361e-07	5.3223e-07
LINC02029-201	-5.7801	-4.505	1.2751	2.4202	9.7031e-08	4.2767e-07
AC008040.1-204	-6.3186	-5.8039	0.5148	1.4288	5.2982e-05	0.0002
LINC00173-201	-5.3205	-4.7343	0.5863	1.5013	0.0112	0.0223
MYLK-AS1-202	-1.8791	-1.8022	0.0769	1.0547	0.7293	0.7716
LINC00880-201	-4.659	-2.9733	1.6857	3.2171	7.8433e-13	5.6545e-12
PSMD6-AS2-201	-1.851	-2.7184	-0.8674	-1.8243	4.3265e-09	2.2478e-08
LINC02023-201	-6.6367	-6.5897	0.047	1.0331	0.2271	0.307
AC004690.2-201	-6.6224	-6.6216	0.0008	1.0006	0.9719	0.9771
DUBR-203	-4.0974	-5.1362	-1.0389	-2.0546	5.0055e-07	1.9559e-06
LINC00973-201	-5.8948	-3.902	1.9928	3.9801	7.7523e-09	3.9183e-08
LINC00115-201	-1.7301	-0.992	0.7382	1.6681	9.5232e-10	5.2406e-09
AC082651.3-201	-3.3212	-4.0952	-0.774	-1.71	0.0006	0.0016
LINC00852-201	-0.584	-1.7775	-1.1935	-2.2871	3.8038e-27	7.1248e-26
AC021074.3-201	-6.5952	-6.568	0.0272	1.019	0.3817	0.4522
AC074386.1-201	-6.4118	-6.0257	0.3861	1.3069	0.0092	0.0188
IGSF11-AS1-201	-6.6027	-6.4221	0.1806	1.1333	0.0014	0.0033
LINC00996-201	-0.6552	-2.658	-2.0028	-4.0079	2.616e-28	5.289e-27
AC082651.1-201	-6.1361	-6.2322	-0.0961	-1.0689	0.4056	0.4732
AC093627.4-202	-4.6594	-4.5655	0.094	1.0673	0.7046	0.7489
LINC00518-202	-6.6145	-5.963	0.6515	1.5708	4.9548e-07	1.9443e-06
MNX1-AS1-201	-4.9556	-1.2324	3.7233	13.2072	1.8885e-31	4.8786e-30
ADAMTS9-AS2-203	-0.7319	-3.6522	-2.9203	-7.5698	1.3242e-48	2.0526e-46
LINC02042-201	-6.3815	-6.2391	0.1425	1.1038	0.1679	0.2359
AC093010.2-201	-5.5141	-5.4919	0.0222	1.0155	0.9011	0.9229
LINC00477-201	-6.5987	-6.4432	0.1556	1.1139	0.0037	0.0084
AC006252.1-201	-3.519	-2.7586	0.7604	1.6939	1.8202e-07	7.6596e-07
AC092910.3-201	-6.5341	-6.3679	0.1661	1.122	0.0253	0.0468
AC093627.4-201	-0.2066	-0.6141	-0.4075	-1.3264	0.0007	0.0017
AC109466.1-209	-6.606	-6.5514	0.0546	1.0386	0.2494	0.3328
AC117394.2-201	-6.4764	-6.1772	0.2992	1.2305	0.0213	0.0402
LINC02016-201	-0.8742	-5.8676	-4.9934	-31.8547	2.5771e-69	2.3967e-66
AC002310.2-202	-5.8101	-4.9626	0.8475	1.7994	9.3247e-07	3.5396e-06
AC093010.2-202	-5.4552	-5.6405	-0.1852	-1.137	0.2554	0.3382
LINC00488-201	-6.6016	-6.3066	0.295	1.2269	0.0039	0.0086
LINC02047-201	-6.6439	-6.6439	0	1	.	.
TCL6-210	-6.0537	-6.1275	-0.0738	-1.0525	0.6168	0.6709
SUCLG2-AS1-203	-1.9231	-2.0501	-0.127	-1.092	0.3444	0.4155
LINC01213-202	-6.3766	-4.4906	1.886	3.696	2.5113e-13	2.0133e-12
FOXP1-IT1-201	-5.8884	-5.8205	0.0678	1.0481	0.6333	0.6856
SBF2-AS1-201	-0.3387	0.8107	1.1494	2.2182	9.3219e-29	2.0161e-27
LINC00682-201	-6.6439	-6.6022	0.0417	1.0293	0.203	0.2784
AL049840.1-201	-0.3888	-0.5617	-0.1729	-1.1273	0.1961	0.2701
LINC00682-202	-6.6439	-6.3023	0.3415	1.2671	0.0003	0.0009
AC099508.1-201	-6.6439	-6.6439	0	1	.	.
AC022113.1-201	-4.4706	-4.6197	-0.1491	-1.1089	0.3378	0.4091
SEC24B-AS1-201	-1.5206	-1.3091	0.2115	1.1579	0.0239	0.0443
AP001922.1-201	-6.6439	-6.6049	0.039	1.0274	0.046	0.0805
LINC02273-201	-2.3007	-3.0506	-0.7499	-1.6817	4.1739e-05	0.0001
AC008966.1-203	-1.6142	-1.4886	0.1256	1.0909	0.2502	0.3334
PLA2G4E-AS1-201	-4.8581	-4.7059	0.1521	1.1112	0.4824	0.5484
AC083805.1-201	-4.1126	-4.5635	-0.4509	-1.3669	0.0064	0.0135
DNAJC3-AS1-201	-0.3822	-0.3175	0.0647	1.0459	0.5089	0.5723
LINC002481-201	-1.209	-2.286	-1.077	-2.1096	1.7359e-12	1.2138e-11
Z84485.1-202	-3.7899	-2.435	1.3548	2.5577	2.8846e-13	2.2735e-12
RRS1-AS1-201	-5.2205	-5.4073	-0.1867	-1.1382	0.0661	0.1084
UBR5-AS1-201	1.2893	0.8503	-0.439	-1.3557	7.3407e-09	3.7305e-08
MGC16275-201	-1.9432	-2.8443	-0.9011	-1.8675	7.7503e-15	6.9979e-14
AC012377.1-201	-6.1026	-5.4776	0.625	1.5423	3.775e-08	1.7554e-07
LINC00900-201	-2.5721	-2.014	0.5581	1.4723	0.0003	0.0007
LINC02325-201	-5.634	-5.4115	0.2225	1.1668	0.1788	0.2492
GPRC5D-AS1-202	0.2224	-0.0518	-0.2743	-1.2094	0.0081	0.0167
LINC00920-201	-0.2832	-1.6157	-1.3325	-2.5184	2.0709e-20	3.0571e-19
AC107067.1-201	-4.166	-5.381	-1.215	-2.3214	7.346e-12	4.8452e-11
CSTF3-AS1-201	-5.6458	-5.0364	0.6094	1.5256	4.5257e-06	1.6065e-05
AC010198.1-201	-5.1882	-5.0512	0.137	1.0996	0.3679	0.4392
FLJ31104-201	-2.7181	-3.7668	-1.0487	-2.0687	3.4811e-12	2.3631e-11
AC092378.1-202	-6.6114	-6.5157	0.0956	1.0685	0.0533	0.09
AC087667.1-201	-6.0625	-4.1719	1.8906	3.708	3.4575e-18	4.2114e-17
AC113382.1-201	-5.8764	-5.5014	0.375	1.2968	0.0082	0.0169
SNHG10-201	-1.2413	-0.9728	0.2684	1.2045	0.0217	0.0407
LINC02458-201	-4.5732	-4.9758	-0.4026	-1.3219	0.0111	0.0221
MIR210HG-201	-0.5574	0.31	0.8673	1.8243	1.3246e-11	8.4954e-11
LINC01585-201	-5.6297	-5.2177	0.412	1.3305	0.0079	0.0163
DDX11-AS1-201	-3.7444	-1.5558	2.1886	4.5587	4.7884e-42	2.9688e-40
AP000802.1-201	-5.4609	-5.7026	-0.2417	-1.1824	0.1417	0.208
AP000873.2-208	-3.5035	-2.3853	1.1181	2.1707	3.4403e-06	1.2401e-05
AC022075.1-201	-2.8279	-0.9903	1.8376	3.5741	2.1588e-15	2.0487e-14
DACT3-AS1-201	-5.2532	-5.5798	-0.3267	-1.2541	0.0238	0.0443
AC090061.1-201	-2.9796	-2.7077	0.2719	1.2074	0.0472	0.082
AC026250.1-201	-4.0036	-2.0915	1.9121	3.7635	6.1326e-39	2.5924e-37
NRAV-201	1.8029	1.9164	0.1135	1.0818	0.1645	0.2322
GS1-24F4.2-201	-5.9253	-5.1129	0.8123	1.7561	8.516e-06	2.9333e-05
AC100861.1-202	-0.4419	0.6705	1.1124	2.1621	4.5859e-28	9.0742e-27
AC090515.2-201	-2.4123	-2.6062	-0.1939	-1.1438	0.0767	0.1236
AC092718.1-201	-5.7375	-5.6347	0.1028	1.0738	0.4712	0.5364
NEAT1-202	3.2713	2.8693	-0.402	-1.3213	0.01	0.0203
AC018797.2-201	-0.5648	-0.5034	0.0614	1.0435	0.443	0.5107
AC044802.1-201	-3.8079	-4.4385	-0.6306	-1.5482	1.1078e-07	4.837e-07
LINC00535-201	-3.668	-4.9388	-1.2708	-2.413	1.0141e-17	1.1789e-16
AC087521.1-201	-0.7373	-3.8732	-3.1359	-8.7902	6.0993e-40	2.8362e-38
AC091948.1-201	-1.9229	-3.6928	-1.7699	-3.4103	5.7612e-30	1.3395e-28
AC005920.1-201	-4.5382	-5.2472	-0.7091	-1.6347	3.8233e-05	0.0001
AC107959.2-201	-6.054	-5.4509	0.6031	1.519	4.8446e-07	1.9091e-06
CKMT2-AS1-202	-1.8515	-2.0901	-0.2386	-1.1799	0.0507	0.0868
AC046130.1-201	-5.0428	-4.2389	0.804	1.7459	1.124e-07	4.8845e-07
AC096746.1-201	-6.6439	-6.6439	0	1	.	.
AC107959.1-202	0.6688	-0.9415	-1.6103	-3.0532	3.7155e-41	2.1596e-39
AC009060.1-202	-6.6332	-6.3667	0.2665	1.2029	0.002	0.0047
AC009292.1-201	-6.0603	-5.8063	0.254	1.1925	0.0611	0.1009
AC008781.2-201	-5.8314	-6.0546	-0.2231	-1.1673	0.1139	0.172
AC055717.1-201	-6.0891	-6.2747	-0.1857	-1.1373	0.0951	0.1477
LINC01267-201	-3.2936	-5.1329	-1.8393	-3.5784	7.7704e-13	5.6457e-12
AL139353.2-202	-4.3936	-3.902	0.4917	1.4061	0.0005	0.0012
AC004590.1-201	-6.4189	-6.261	0.1578	1.1156	0.165	0.2325
FGF10-AS1-201	-4.0528	-6.1137	-2.0609	-4.1724	2.7164e-36	1.0526e-34
LINC01085-201	-5.9961	-6.0104	-0.0143	-1.01	0.9084	0.9264
AC036214.1-201	-5.8084	-5.4331	0.3752	1.297	0.0026	0.006
HHIP-AS1-201	2.2015	-0.6795	-2.881	-7.3668	2.6124e-33	8.6771e-32
AC112204.2-201	-6.4684	-6.6149	-0.1465	-1.1069	0.0444	0.0787
AC109349.1-201	-6.6439	-6.6317	0.0122	1.0085	0.3184	0.3912
AC008443.4-201	-5.9503	-5.6497	0.3006	1.2317	0.0874	0.1378
NOP14-AS1-201	-4.9147	-5.6038	-0.689	-1.6122	3.9343e-07	1.5771e-06
LINC02114-201	-6.6439	-6.6439	0	1	.	.
LINC02148-201	-5.0878	-6.1944	-1.1066	-2.1534	3.9046e-13	2.9765e-12
LINC02431-201	-6.6439	-6.6439	0	1	.	.
AC023794.1-201	-5.6365	-5.87	-0.2335	-1.1757	0.2348	0.3151
LINC00958-201	-3.0112	-0.9291	2.0821	4.2342	5.4e-09	2.79e-08
PCAT4-201	-6.5398	-6.558	-0.0182	-1.0127	0.6984	0.7449
LINC02239-201	-6.6439	-6.6115	0.0323	1.0227	0.0922	0.1438
NPHP3-AS1-202	-6.3816	-6.2427	0.1389	1.1011	0.0731	0.1191
AP002884.3-201	-3.5408	-3.5519	-0.0111	-1.0077	0.9382	0.9494
AP000866.2-201	0.032	-2.933	-2.965	-7.8082	5.2778e-47	6.1354e-45
AC016687.3-202	-6.6439	-6.501	0.1429	1.1041	0.0143	0.0281
LINC01019-201	-5.927	-6.2041	-0.2771	-1.2118	0.0308	0.056
AC025171.2-202	-5.1274	-5.2853	-0.1579	-1.1156	0.5009	0.5661
AC012339.1-201	-6.6034	-6.5178	0.0856	1.0611	0.16	0.2293
AC092546.1-202	-6.506	-6.4515	0.0545	1.0385	0.5207	0.5849
AL121796.1-201	-6.6439	-6.5792	0.0646	1.0458	0.0966	0.1497
TMEM108-AS1-202	-5.4807	-6.2439	-0.7632	-1.6973	1.9297e-08	9.2504e-08
CACNA1G-AS1-202	-5.3137	-5.2906	0.0231	1.0161	0.8839	0.9103
AC018682.1-201	-4.51	-4.5867	-0.0768	-1.0546	0.6252	0.6776
AC007663.2-201	-3.3855	-5.3581	-1.9727	-3.925	5.519e-24	9.3322e-23
LINC01957-201	-6.6439	-6.5371	0.1068	1.0768	0.1276	0.1902
LINC02059-202	-6.6275	-6.5646	0.0629	1.0446	0.1012	0.1552
AC109830.1-203	-6.6439	-6.4038	0.2401	1.1811	0.0077	0.016
PART1-202	-5.9436	-6.0284	-0.0848	-1.0606	0.5297	0.5914
AC078881.1-201	-3.3044	-3.9648	-0.6604	-1.5805	3.4903e-05	0.0001
LINC02172-201	-5.0935	-5.5084	-0.4149	-1.3332	0.0025	0.0058
AC113410.2-201	-6.5762	-6.5417	0.0345	1.0242	0.6076	0.6624
TRIM52-AS1-202	-1.7996	-2.5095	-0.71	-1.6358	3.0436e-06	1.1014e-05
LINC02145-202	-3.9792	-4.73	-0.7508	-1.6827	2.1884e-05	7.2685e-05
AC110760.2-201	-5.3093	-5.8301	-0.5208	-1.4347	0.0013	0.0031
LINC02221-201	-6.6439	-6.6439	0	1	.	.
AC117500.2-201	-6.21	-6.0748	0.1352	1.0982	0.3417	0.4127
AL133372.2-203	-6.6129	-6.3096	0.3033	1.2339	0.0028	0.0064
LINC02381-201	0.796	0.8967	0.1007	1.0723	0.525	0.5882
LINC02171-201	-6.6328	-6.5805	0.0522	1.0369	0.2381	0.3185
AC008525.1-201	-6.6084	-6.5689	0.0395	1.0278	0.3496	0.4206
LINC02119-201	-6.6201	-6.4172	0.2028	1.151	0.0014	0.0035
SMAD1-AS2-201	-6.2394	-6.2918	-0.0524	-1.037	0.671	0.7198
AC092335.1-201	-6.6439	-6.4297	0.2142	1.16	0.002	0.0047
AC104958.1-201	-5.4752	-5.6398	-0.1646	-1.1209	0.2855	0.3708
LINC02116-201	-6.6439	-6.5858	0.058	1.041	0.0819	0.1304
LINC02510-201	-6.6439	-6.6104	0.0335	1.0235	0.1755	0.2454
LINC02493-201	-6.6106	-6.6066	0.004	1.0027	0.8931	0.9158
LINC02199-202	-6.6439	-6.5995	0.0444	1.0313	0.0943	0.1467
AC139493.2-202	-6.3241	-6.3107	0.0134	1.0093	0.9048	0.9247
LINC02225-201	-6.6375	-6.6057	0.0318	1.0223	0.0411	0.0732
LINC01234-201	-6.5219	-5.4878	1.0341	2.0478	3.9249e-10	2.2394e-09
AC096736.3-201	-6.5777	-6.4888	0.0889	1.0636	0.152	0.2216
LINC02380-201	-6.6259	-6.6126	0.0133	1.0093	0.6007	0.658
AP003555.1-202	-6.493	-6.4919	0.0011	1.0008	0.9872	0.9904
AC096734.1-201	-6.2078	-5.4404	0.7674	1.7022	1.482e-06	5.4912e-06
LINC02149-201	-6.6207	-6.5905	0.0303	1.0212	0.4935	0.5591
AP003716.1-202	-5.3181	-5.4503	-0.1321	-1.0959	0.3045	0.3912
AC104827.1-202	-6.2951	-6.1719	0.1232	1.0892	0.2544	0.3375
AC141928.1-201	-2.4183	-3.8955	-1.4772	-2.7841	3.5482e-14	3.0554e-13
LINC01365-202	-6.6439	-6.6439	0	1	.	.
HHIP-AS1-203	-6.3843	-6.2661	0.1182	1.0853	0.3639	0.435
LINC00290-201	-6.6255	-6.5884	0.0371	1.0261	0.326	0.399
LINC02475-202	-5.9317	-4.1655	1.7662	3.4016	2.5781e-13	2.0493e-12
AC023136.1-201	-6.6439	-6.6439	0	1	.	.
LINC02150-201	-6.4863	-6.4424	0.0438	1.0308	0.4487	0.5145
PURPL-205	-6.4649	-6.3989	0.066	1.0468	0.5499	0.6089
AC092611.1-201	-3.7143	-3.4957	0.2186	1.1636	0.1127	0.1707
AC093909.4-201	-6.0733	-6.546	-0.4727	-1.3877	1.6285e-08	7.8881e-08
CTD-2194D22.4-201	-6.6321	-6.4773	0.1547	1.1132	0.0049	0.0107
FOXD1-AS1-201	-4.3319	-2.5064	1.8255	3.5443	6.592e-07	2.5544e-06
LINC02071-201	-6.5995	-6.3764	0.2231	1.1672	0.0002	0.0005
AC097537.1-201	-5.3908	-6.5737	-1.1829	-2.2703	2.8186e-16	2.9126e-15
LINC02123-201	-6.6439	-6.6345	0.0093	1.0065	0.3184	0.3912
LINC00605-201	-4.3315	-3.975	0.3565	1.2803	0.128	0.1904
LINC01618-201	-6.6009	-6.5555	0.0455	1.032	0.3377	0.4091
LINC02353-201	-6.6439	-6.5848	0.059	1.0418	0.0479	0.0829
AC097375.3-201	-6.6136	-6.5802	0.0334	1.0234	0.2513	0.3339
AC109830.1-202	-6.6439	-6.5465	0.0974	1.0698	0.0529	0.0897
FLJ12825-201	-5.3763	-4.4537	0.9226	1.8955	8.4369e-09	4.2184e-08
LINC01091-204	-5.8111	-6.0925	-0.2814	-1.2153	0.0209	0.0395
LINC02382-201	-6.2594	-5.8791	0.3804	1.3017	0.0351	0.0632
SLIT2-IT1-201	-5.4869	-5.8843	-0.3974	-1.3171	0.0251	0.0466
AC008663.2-201	-3.5284	-4.6057	-1.0773	-2.1101	1.1694e-14	1.026e-13
LINC02099-201	-5.7827	-4.6019	1.1808	2.2671	4.7431e-14	4.0468e-13
LINC00051-201	-6.5308	-6.525	0.0058	1.004	0.9278	0.942
MIR3142HG-201	-2.0094	-2.0309	-0.0215	-1.015	0.9135	0.9303
CARMN-205	-5.0072	-5.4195	-0.4124	-1.3309	0.0143	0.0281
ZFHX4-AS1-201	-6.356	-5.7612	0.5948	1.5103	6.8846e-05	0.0002
LINC01845-201	-6.608	-6.5198	0.0882	1.0631	0.0457	0.0804
FER1L6-AS1-201	-6.6123	-6.4926	0.1197	1.0865	0.1107	0.1682
LINC01111-201	-6.5306	-6.5631	-0.0324	-1.0227	0.5001	0.5658
AC104051.2-201	-4.9601	-6.096	-1.1358	-2.1974	6.718e-21	1.0242e-19
LINC01289-201	-6.633	-6.4417	0.1913	1.1418	5.3207e-06	1.8533e-05
AC025524.2-211	-6.6439	-6.5606	0.0832	1.0594	0.0762	0.1234
AC021355.1-202	-6.6439	-6.6439	0	1	.	.
EXTL3-AS1-203	-5.7853	-5.1498	0.6356	1.5535	0.0001	0.0004
AC022784.6-204	-5.9397	-6.4637	-0.5241	-1.438	7.6787e-12	4.9939e-11
HPYR1-201	-6.1844	-6.5453	-0.3609	-1.2843	4.5992e-05	0.0001
LINC00588-201	-6.334	-6.558	-0.224	-1.168	0.0014	0.0035
PVT1-212	-3.8027	-0.8429	2.9598	7.7799	9.9509e-31	2.4353e-29
AC091946.1-201	-6.3203	-5.8776	0.4428	1.3592	0.0028	0.0065
LINC01419-201	-6.4532	-5.5638	0.8894	1.8525	0.0004	0.001
LINC02153-202	-6.5998	-6.6263	-0.0265	-1.0185	0.3896	0.4598
AC016065.1-203	-0.8103	-0.0297	0.7806	1.7178	1.4846e-10	8.7939e-10
AC004080.2-201	-6.593	-5.7661	0.8269	1.7739	1.6482e-08	7.942e-08
AC019270.1-201	-6.5483	-6.5461	0.0022	1.0015	0.9626	0.9688
AC138356.3-201	-6.4941	-6.0381	0.4561	1.3718	0.0003	0.0008
AC090921.1-201	-5.742	-5.2489	0.493	1.4074	0.0011	0.0028
AC037486.1-201	-6.6332	-6.1786	0.4546	1.3704	3.9789e-06	1.4248e-05
OTUD6B-AS1-202	3.1315	2.8021	-0.3294	-1.2565	1.4012e-07	5.9502e-07
AC100800.1-201	-6.3961	-6.0706	0.3255	1.2531	0.0157	0.0304
HOXA-AS3-205	-3.6447	-2.7989	0.8458	1.7972	1.0726e-05	3.6406e-05
AC068858.1-201	-6.6022	-6.3169	0.2853	1.2187	6.1742e-05	0.0002
AP002957.1-203	-6.1472	-4.6609	1.4863	2.8017	2.3813e-13	1.9257e-12
RAB30-AS1-202	0.6686	1.059	0.3903	1.3107	0.0006	0.0015
AP003110.1-201	-6.128	-6.2646	-0.1366	-1.0993	0.2625	0.3446
ZNF252P-AS1-201	-4.9152	-3.7802	1.135	2.1962	8.7249e-15	7.8021e-14
AC010624.1-201	-2.483	-4.7417	-2.2587	-4.7857	3.1506e-19	4.2465e-18
AC005833.1-201	-4.9242	-6.0384	-1.1142	-2.1648	1.109e-14	9.8222e-14
AP000873.2-209	-5.0677	-4.8404	0.2273	1.1707	0.3917	0.4611
TBX5-AS1-201	2.0609	-0.0527	-2.1136	-4.3276	1.1159e-40	6.1044e-39
AP002008.3-201	-6.3677	-6.2834	0.0843	1.0601	0.3279	0.4002
AP000873.2-207	-6.0232	-5.5264	0.4968	1.4111	0.0115	0.0228
AP002008.1-201	-5.2289	-5.4648	-0.236	-1.1777	0.2071	0.2836
AC103796.1-201	-6.6192	-6.6439	-0.0246	-1.0172	0.3184	0.3912
TOLLIP-AS1-201	-0.3746	-0.6763	-0.3017	-1.2326	0.0155	0.0301
AC105219.1-201	-2.7031	-2.6897	0.0133	1.0093	0.9066	0.9255
TRAF3IP2-AS1-209	-4.9626	-5.1511	-0.1885	-1.1396	0.1849	0.2562
AP000911.1-202	-6.568	-6.3559	0.2121	1.1584	0.0186	0.0355
NAV2-AS4-201	-6.036	-6.2537	-0.2177	-1.1629	0.098	0.1513
KIRREL3-AS2-201	-6.6439	-6.5838	0.06	1.0425	0.1631	0.2316
RAB30-AS1-207	-1.5125	-1.0688	0.4437	1.3601	0.0022	0.0052
CASC23-201	-6.6439	-6.6065	0.0373	1.0262	0.0493	0.0847
LINC02282-201	-6.6321	-6.2451	0.387	1.3077	0.0006	0.0016
PXN-AS1-201	-0.6754	-0.8824	-0.207	-1.1543	0.0469	0.0816
LINC02419-201	-6.4735	-6.4022	0.0713	1.0506	0.3207	0.3934
LINC00943-203	-5.5032	-5.3839	0.1193	1.0862	0.4175	0.4848
CLIP1-AS1-201	-4.8868	-4.8443	0.0425	1.0299	0.7859	0.8258
AC007368.1-201	-6.5509	-6.4325	0.1185	1.0856	0.1546	0.2247
LINC00944-201	-6.0881	-5.5759	0.5122	1.4262	0.0064	0.0135
LINC02443-201	-6.6134	-6.0759	0.5375	1.4514	8.6498e-07	3.2969e-06
AC005885.1-205	-5.7913	-5.3754	0.4159	1.3341	0.0358	0.0642
AC117500.3-201	-5.0384	-5.1988	-0.1604	-1.1176	0.4153	0.4828
LINC00943-204	-6.1877	-6.1612	0.0266	1.0186	0.8136	0.8492
AC006065.4-204	-6.5803	-6.5936	-0.0134	-1.0093	0.7882	0.8274
AC021054.1-201	2.7115	1.3718	-1.3397	-2.531	1.3022e-30	3.1053e-29
AC073862.1-201	-4.5367	-5.7497	-1.213	-2.3182	2.4072e-06	8.745e-06
AC087235.1-201	-6.6148	-6.5353	0.0796	1.0567	0.1049	0.1604
MRGPRF-AS1-201	-4.3838	-5.7902	-1.4064	-2.6507	1.6268e-17	1.8228e-16
AC069503.1-201	-6.1874	-5.4179	0.7695	1.7047	9.7078e-07	3.6552e-06
AC156455.1-201	-1.675	-2.2931	-0.6181	-1.5349	0.0002	0.0006
LINC02387-201	-5.6859	-4.3784	1.3075	2.4751	4.0729e-08	1.8845e-07
AC006065.3-201	-6.6165	-6.6439	-0.0273	-1.0191	0.3184	0.3912
LINC02421-201	-5.6463	-5.6817	-0.0354	-1.0249	0.7407	0.7827
TMEM132D-AS2-201	-6.6335	-6.6019	0.0317	1.0222	0.2343	0.3149
ADGRD1-AS1-202	0.2012	-1.6779	-1.8791	-3.6785	2.7635e-08	1.298e-07
SMCR5-201	-5.8864	-5.6183	0.2682	1.2043	0.0461	0.0806
LINC02350-201	-6.6439	-6.5815	0.0623	1.0442	0.1597	0.2291
AC018653.3-201	-2.3291	-1.7319	0.5972	1.5127	0.0012	0.0031
LINC02375-201	-6.6439	-6.627	0.0168	1.0117	0.3184	0.3912
AC007622.2-202	-4.5099	-4.2232	0.2867	1.2198	0.057	0.0954
AC068888.1-207	0.1243	-0.2677	-0.3919	-1.3121	0.0016	0.004
LINC00485-201	-6.5262	-6.3128	0.2134	1.1594	0.0099	0.02
AC079385.2-201	-6.0291	-5.9379	0.0912	1.0652	0.5085	0.5723
AC117377.1-201	-6.6439	-6.6338	0.01	1.007	0.3184	0.3912
LINC01234-202	-6.1498	-3.4728	2.677	6.3954	2.1318e-15	2.0439e-14
MIR4307HG-201	-6.6439	-6.4886	0.1553	1.1136	0.0068	0.0143
AC023509.2-201	0.9002	-3.5581	-4.4583	-21.9833	8.939e-46	9.2369e-44
LINC02424-201	-6.6439	-6.627	0.0168	1.0117	0.3184	0.3912
CASC18-202	-4.9473	-4.3781	0.5691	1.4836	0.0009	0.0024
AC089998.1-201	-5.7726	-6.2852	-0.5125	-1.4266	1.0179e-06	3.817e-06
TMPO-AS1-202	-2.1174	-0.431	1.6864	3.2186	3.6898e-32	1.0399e-30
AC091534.1-201	-6.6439	-6.5903	0.0535	1.0378	0.0516	0.0881
RMST-205	-5.2224	-6.2134	-0.991	-1.9875	2.4995e-07	1.024e-06
AC117498.2-202	-3.0737	-3.2023	-0.1286	-1.0932	0.5866	0.6448
AC012085.2-201	-3.5546	-4.8687	-1.3141	-2.4865	6.0538e-13	4.4682e-12
TRHDE-AS1-204	-5.6271	-6.2711	-0.644	-1.5626	0.0004	0.001
LINC02402-201	-6.6439	-6.6439	0	1	.	.
LINC02426-201	-6.6439	-6.6214	0.0225	1.0157	0.161	0.2299
LINC02388-201	-6.2137	-6.2498	-0.0361	-1.0254	0.7042	0.7489
AL589743.1-201	-6.3328	-5.4873	0.8455	1.7969	3.916e-10	2.2394e-09
AC011611.3-201	-6.2398	-6.2933	-0.0535	-1.0378	0.7538	0.7948
AC087897.2-201	-6.5971	-6.6123	-0.0152	-1.0106	0.6641	0.7141
AC027288.3-203	-5.3677	-6.5215	-1.1538	-2.225	7.5219e-12	4.9263e-11
AL137786.1-201	-4.5868	-5.1481	-0.5613	-1.4756	0.0044	0.0097
ITPK1-AS1-201	-5.9399	-6.0928	-0.1529	-1.1118	0.1532	0.2229
AL139193.2-201	-6.6085	-6.5535	0.055	1.0389	0.2618	0.3446
LINC02318-201	-6.5135	-6.4894	0.0241	1.0168	0.6899	0.7375
DIO2-AS1-201	-6.6052	-6.5833	0.022	1.0153	0.5536	0.6122
FOXN3-AS2-201	-6.2898	-6.2682	0.0215	1.015	0.8613	0.895
CRAT37-201	-6.1799	-6.3099	-0.13	-1.0943	0.1559	0.2262
SNHG14-221	-6.3398	-6.2433	0.0965	1.0692	0.3863	0.4571
FAM181A-AS1-202	-3.9485	-5.921	-1.9725	-3.9245	2.3834e-20	3.4634e-19
LINC02274-201	-5.3617	-5.6595	-0.2977	-1.2292	0.0687	0.1122
LINC00638-201	-1.4793	-0.7863	0.693	1.6166	1.5871e-09	8.5813e-09
AL121809.1-201	-6.5387	-6.4534	0.0854	1.0609	0.179	0.2492
AL096869.2-202	-5.8005	-6.1328	-0.3324	-1.2591	0.0086	0.0176
AL355922.2-201	-2.3345	-1.8218	0.5127	1.4267	0.0032	0.0073
LINC00645-203	-6.6129	-6.2021	0.4108	1.3294	7.1506e-08	3.2126e-07
AL117192.1-202	-6.5465	-6.5465	-0.0001	-1	0.9992	0.9992
AC015914.1-201	-3.3213	-5.5931	-2.2718	-4.8293	3.8466e-33	1.1684e-31
ZNF710-AS1-201	-0.0007	-0.7064	-0.7057	-1.631	0.0329	0.0594
LINC01581-202	-6.6272	-6.5192	0.108	1.0777	0.0098	0.02
EWSAT1-206	-5.7438	-4.9618	0.782	1.7195	0.0001	0.0003
AC105133.1-201	-6.6439	-6.6439	0	1	.	.
INAFM2-201	2.706	1.9054	-0.8006	-1.7418	5.1065e-20	7.1955e-19
CERNA1-202	-2.5306	-2.5124	0.0182	1.0127	0.8851	0.9106
AC022613.3-201	-3.7913	-4.7436	-0.9523	-1.935	2.1933e-07	9.1262e-07
AC104590.1-201	-4.1975	-3.7345	0.4631	1.3785	0.0507	0.0868
AC104574.1-201	-6.6439	-6.6249	0.0189	1.0132	0.3184	0.3912
LINC02349-201	-6.6439	-6.6291	0.0148	1.0103	0.3184	0.3912
LINC00566-201	-6.6439	-6.5978	0.046	1.0324	0.1609	0.2299
LINC01616-201	-4.0642	-6.2627	-2.1985	-4.5902	2.7332e-32	7.9435e-31
AC112236.1-201	-6.3848	-5.0235	1.3613	2.5692	6.758e-12	4.4892e-11
LINC01963-201	1.3514	0.119	-1.2324	-2.3495	1.6278e-28	3.3642e-27
AC034111.1-201	-6.343	-6.1787	0.1644	1.1207	0.0454	0.0802
AC141586.3-201	-6.5929	-6.5724	0.0205	1.0143	0.7549	0.7951
LCMT1-AS2-201	-5.6041	-5.4557	0.1484	1.1083	0.2932	0.3792
LINC02249-202	-6.2421	-6.0427	0.1994	1.1482	0.0896	0.1407
LINC00565-201	-3.7248	-3.7368	-0.012	-1.0084	0.9256	0.9408
LINC00622-201	-0.3843	-1.4882	-1.1039	-2.1494	5.7842e-15	5.3261e-14
VPS9D1-AS1-202	-2.1951	0.8736	3.0687	8.3904	5.9482e-40	2.8362e-38
LINC00838-201	-6.6439	-6.5767	0.0672	1.0477	0.0053	0.0114
IL21R-AS1-201	-4.7436	-4.6749	0.0687	1.0488	0.6706	0.7198
AC015818.2-201	-6.2754	-4.7075	1.5679	2.9648	1.4678e-13	1.208e-12
AC068870.1-201	-4.4951	-5.3973	-0.9022	-1.8689	2.8684e-11	1.8025e-10
FBXL19-AS1-201	-1.3871	-1.1075	0.2796	1.2138	0.011	0.0219
LINC02555-201	1.1218	-3.1462	-4.2681	-19.2669	1.0526e-45	9.7894e-44
AL138976.2-201	-1.353	-1.3319	0.021	1.0147	0.8642	0.897
SNHG9-202	-3.1089	-3.3565	-0.2476	-1.1872	0.2943	0.3802
AL118516.1-201	1.0753	1.5169	0.4416	1.3581	0.0008	0.002
LINC01898-201	-6.6439	-6.6279	0.016	1.0111	0.1573	0.2267
AL035425.3-201	-4.8383	-5.3221	-0.4838	-1.3984	0.0156	0.0302
AC010336.2-201	-4.7165	-3.7841	0.9324	1.9085	0.0001	0.0003
AL158212.3-201	0.2943	-0.6353	-0.9296	-1.9047	7.3124e-18	8.6083e-17
LINC00261-202	2.2835	-1.5587	-3.8422	-14.3421	8.1983e-30	1.8596e-28
AC036108.3-201	-2.3834	-3.0893	-0.7059	-1.6312	7.1111e-11	4.2943e-10
UBL7-AS1-203	-0.011	0.3056	0.3167	1.2454	6.7976e-05	0.0002
LINC01003-201	1.1009	0.8068	-0.2942	-1.2262	0.0009	0.0022
LINC01917-201	-6.0971	-6.4759	-0.3788	-1.3003	0.0005	0.0014
AC009414.2-201	0.6395	-0.2948	-0.9343	-1.9109	6.0124e-11	3.6546e-10
AL049796.1-201	-2.2201	-2.6954	-0.4753	-1.3902	6.3388e-07	2.4666e-06
AF096876.1-201	-6.6439	-6.6439	0	1	.	.
AC022167.2-201	-0.6741	-0.5277	0.1464	1.1068	0.1203	0.1802
AC136285.1-201	-6.5478	-6.5143	0.0336	1.0235	0.5496	0.6089
LINC01477-201	-6.6439	-6.6188	0.0251	1.0175	0.1851	0.2562
AL441883.1-201	-6.0925	-4.9427	1.1498	2.2188	5.3695e-05	0.0002
AL353746.1-201	-6.2158	-5.5492	0.6666	1.5873	1.3006e-05	4.3826e-05
LINC01686-201	-2.3853	-2.059	0.3264	1.2539	0.0128	0.0252
LINC00563-201	-4.6974	-5.9052	-1.2079	-2.3099	1.9577e-16	2.0456e-15
AP001527.1-201	-5.4967	-6.0657	-0.569	-1.4835	4.7967e-06	1.6897e-05
AC007066.2-202	-1.2252	-1.5389	-0.3138	-1.2429	0.0029	0.0066
AC092447.8-201	-6.6439	-6.6439	0	1	.	.
LINC02140-202	-6.5773	-6.4126	0.1647	1.1209	0.0278	0.051
JHDM1D-AS1-201	0.9404	1.5858	0.6454	1.5642	2.6367e-07	1.0755e-06
LINC01834-201	-6.6439	-6.5764	0.0675	1.0479	0.0841	0.133
DKFZP434H168-201	-6.5583	-6.4613	0.097	1.0696	0.2078	0.2842
AL050341.2-201	1.427	1.3513	-0.0758	-1.0539	0.4467	0.5129
AP000223.1-201	-2.1844	-4.1296	-1.9452	-3.8509	3.1639e-22	5.2544e-21
HEXA-AS1-201	-3.4278	-3.4845	-0.0567	-1.0401	0.6485	0.7005
AC138627.1-208	-6.5124	-6.5693	-0.0569	-1.0403	0.3578	0.4294
AC023043.1-201	0.5461	0.7389	0.1928	1.143	0.193	0.2663
AC006058.1-201	-1.0347	-3.3175	-2.2828	-4.8662	3.6388e-22	5.937e-21
AC009812.4-201	-0.7403	-1.0655	-0.3253	-1.2529	0.01	0.0203
LINC01566-202	-6.6371	-6.6372	-0.0001	-1.0001	0.9932	0.9943
VENTXP1-201	-6.6439	-6.5018	0.1421	1.1035	0.0107	0.0215
AL807752.5-201	-3.4347	-3.3049	0.1298	1.0941	0.4311	0.4981
AC023830.1-201	-4.7603	-5.0453	-0.2849	-1.2184	0.0746	0.1211
AC139256.1-201	-0.7435	-0.9119	-0.1684	-1.1238	0.1592	0.2289
AC007823.1-201	-3.6645	-3.1352	0.5292	1.4432	0.0002	0.0005
LINC02192-201	-6.5318	-6.2439	0.2879	1.2209	0.004	0.0089
LINC02175-201	-3.4116	-3.4303	-0.0187	-1.013	0.8823	0.9097
AC087388.1-201	-2.1415	-0.939	1.2025	2.3014	3.3147e-18	4.1102e-17
AC087500.1-202	-1.3073	-1.9637	-0.6564	-1.5761	8.3317e-10	4.6122e-09
AC015909.3-201	-6.2675	-6.0449	0.2227	1.1669	0.0769	0.1238
DLGAP1-AS2-201	-1.386	-0.6643	0.7217	1.6492	3.1182e-05	0.0001
LINC01569-202	-1.2468	-0.3996	0.8472	1.799	9.6692e-13	6.9172e-12
AC040160.1-201	-1.6076	-1.584	0.0235	1.0164	0.8327	0.8663
AC024361.2-201	-4.3576	-3.6329	0.7247	1.6526	0.0002	0.0007
AC139530.1-201	1.0449	0.7391	-0.3058	-1.2361	0.002	0.0048
LINC02091-201	-4.7233	-5.4387	-0.7155	-1.642	8.8693e-05	0.0003
AC127496.1-201	-5.3677	-5.1922	0.1755	1.1293	0.1386	0.2042
AC007638.1-201	-6.4895	-6.6034	-0.1139	-1.0821	0.0153	0.0297
AC015813.1-202	-0.9954	-0.8464	0.149	1.1088	0.2903	0.3761
AC005725.1-201	-4.8192	-5.2882	-0.469	-1.3842	0.0126	0.0249
DLGAP1-AS3-201	-5.5324	-6.1023	-0.5699	-1.4844	0.0001	0.0004
LINC02076-201	-4.9971	-3.7641	1.233	2.3505	7.1994e-09	3.6788e-08
AP002478.1-201	-5.5137	-4.361	1.1527	2.2233	7.78e-07	3.0023e-06
WWC2-AS2-201	-1.2883	-2.7321	-1.4438	-2.7204	1.5525e-25	2.7241e-24
L3MBTL4-AS1-201	-3.4387	-3.1595	0.2792	1.2135	0.0776	0.1242
PCAT18-201	-5.7566	-5.4639	0.2926	1.2249	0.1237	0.1847
AA06-201	-6.6439	-6.6439	0	1	.	.
LINC00909-202	1.1459	0.8669	-0.279	-1.2134	5.1677e-05	0.0002
AP005329.2-201	-1.2173	-1.2584	-0.0411	-1.0289	0.6976	0.7449
LINC00526-201	0.2346	0.5182	0.2836	1.2172	0.0003	0.0009
AC018521.3-201	-6.4375	-6.0689	0.3685	1.2911	0.0006	0.0016
MAFG-AS1-201	0.0463	1.2114	1.1651	2.2425	1.0891e-21	1.7464e-20
AC012417.1-201	-5.2551	-5.3527	-0.0976	-1.07	0.5393	0.6007
CYP4F35P-201	-2.0797	-3.3163	-1.2365	-2.3563	6.6291e-12	4.4353e-11
GATA6-AS1-202	-0.1319	-3.5312	-3.3993	-10.5508	5.0477e-52	9.3887e-50
ESRG-201	-5.166	-4.3492	0.8168	1.7615	0.0006	0.0016
AC015813.1-203	-0.6789	-0.5344	0.1445	1.1053	0.31	0.3912
AL354674.1-201	-6.6227	-6.5886	0.0342	1.024	0.4432	0.5107
ZNF667-AS1-201	1.8134	0.8807	-0.9327	-1.9088	8.0196e-07	3.0819e-06
AC021517.1-202	-6.6189	-6.4059	0.2129	1.159	0.0011	0.0026
AC016493.1-201	-6.6232	-6.5428	0.0804	1.0573	0.202	0.2775
AP001198.1-201	-6.5601	-6.535	0.025	1.0175	0.582	0.6406
AC011815.1-201	-2.1295	-1.5395	0.59	1.5053	1.8885e-09	9.9792e-09
AC010980.2-201	-2.631	-1.1413	1.4896	2.8082	3.4672e-11	2.1497e-10
AC006213.2-201	-1.6674	-1.8519	-0.1845	-1.1364	0.1634	0.2317
LINC01864-201	-6.2863	-6.3898	-0.1034	-1.0743	0.1812	0.2515
AC006116.8-202	-4.4564	-4.523	-0.0666	-1.0472	0.6842	0.7331
AC020916.1-201	3.5303	2.4378	-1.0925	-2.1324	1.8471e-09	9.8161e-09
LINC01538-201	-6.6377	-6.6055	0.0322	1.0225	0.2447	0.327
LDLRAD4-AS1-201	-3.7711	-5.9651	-2.1941	-4.5759	3.414e-33	1.0948e-31
AC139100.1-201	-3.4872	-3.0381	0.4491	1.3652	0.0012	0.0031
TNRC6C-AS1-201	1.6127	1.2917	-0.321	-1.2492	0.0042	0.0092
LINC01924-201	-6.6439	-6.4986	0.1453	1.106	0.0065	0.0136
LINC00906-206	-5.9164	-6.4901	-0.5737	-1.4884	3.5292e-10	2.0386e-09
AC005394.1-201	-6.6051	-6.4701	0.1349	1.098	0.048	0.083
AC010680.1-201	-5.4321	-6.1457	-0.7136	-1.6399	2.3732e-11	1.5117e-10
RNF157-AS1-204	-2.7015	-2.5194	0.1821	1.1345	0.3084	0.3912
KCNJ2-AS1-201	-1.1802	-1.6583	-0.478	-1.3928	0.0018	0.0043
AC006557.1-201	-5.3084	-4.9907	0.3177	1.2463	0.0533	0.09
AC091152.2-201	-3.2141	-3.1613	0.0528	1.0372	0.6415	0.6938
AC010327.3-201	-4.4992	-4.4305	0.0687	1.0488	0.743	0.7843
AC004917.1-204	-6.4162	-6.374	0.0423	1.0297	0.6526	0.7041
AC021683.3-202	-6.5788	-5.8648	0.714	1.6404	3.5036e-07	1.4105e-06
FAM95B1-212	-1.6382	-3.0878	-1.4496	-2.7312	2.1017e-14	1.8267e-13
AC123912.2-201	-6.353	-6.4028	-0.0497	-1.0351	0.4925	0.5586
LINC01838-201	-6.3746	-6.2692	0.1054	1.0758	0.3472	0.4183
AC005498.3-201	-1.9857	-2.6373	-0.6517	-1.571	3.0314e-07	1.2311e-06
AC026304.1-201	-0.3174	0.0633	0.3807	1.302	0.0029	0.0065
AC006262.1-203	-5.4422	-3.7276	1.7146	3.282	1.8508e-12	1.2845e-11
AL031282.2-201	-0.0116	-0.0609	-0.0493	-1.0347	0.6572	0.7074
LINC00664-203	-4.0673	-4.6919	-0.6245	-1.5417	0.0019	0.0046
LINC02135-201	-6.6033	-6.534	0.0692	1.0492	0.129	0.1916
MZF1-AS1-202	-1.0557	-1.4252	-0.3696	-1.292	0.0034	0.0076
AC010300.1-201	-3.1408	-4.2082	-1.0674	-2.0957	2.6807e-10	1.5679e-09
CARD8-AS1-201	1.4924	0.4055	-1.0868	-2.1241	3.6474e-21	5.6535e-20
MKNK1-AS1-201	-3.7301	-4.1358	-0.4058	-1.3248	0.005	0.0109
AL513318.2-201	-2.9337	-1.5809	1.3528	2.554	5.0976e-05	0.0002
MAP2K4P1-202	-4.5555	-5.3893	-0.8339	-1.7825	8.221e-10	4.5782e-09
AL158152.1-201	-0.7485	-2.8438	-2.0953	-4.2731	1.2484e-13	1.0555e-12
AC146944.4-201	2.4549	1.4767	-0.9783	-1.9701	7.7145e-20	1.0708e-18
AL356488.2-201	-4.8776	-4.5346	0.3431	1.2684	0.3124	0.3912
AC078795.2-201	-0.1796	-1.0064	-0.8268	-1.7737	3.0191e-11	1.8844e-10
CARMN-210	-2.5743	-4.1845	-1.6103	-3.0531	3.7917e-19	5.0375e-18
AC087203.3-201	-0.3934	-0.8793	-0.4859	-1.4005	0.0008	0.0021
